# Supplementary material for: The Mechanism of Dehydrating Bimodules in trans‐Acyltransferase Polyketide Biosynthesis: A Showcase Study on Hepatoprotective Hangtaimycin
Source: PubMed Central journal article supplement (PMC8456789; doi:10.1002/anie.202106250), 2021-07-28
Supplement: ANIE-60-19139-s001.pdf [file ANIE-60-19139-s001.pdf]

## Supporting Information

### **The Mechanism of Dehydrating Bimodules in *trans*-Acyltransferase Polyketide Biosynthesis: A Showcase Study on Hepatoprotective Hangtaimycin**

*Minghe Luo<sup>+</sup>, Houchao Xu<sup>+</sup>, Yulu Dong, Kun Shen, Junlei Lu, Zhiyong Yin, Miaomiao Qi, Guo Sun, Lingjie Tang, Jin Xiang, Zixin Deng, Jeroen S. Dickschat,\* and Yuhui Sun\**

anie\_202106250\_sm\_miscellaneous\_information.pdf

## Supporting Information

## Table of Contents

|                                                                                                                                        |    |
|----------------------------------------------------------------------------------------------------------------------------------------|----|
| <b>Table S1.</b> Bacterial strains and plasmids used in this study.....                                                                | 4  |
| <b>Table S2.</b> List of oligonucleotide primers used in this study .....                                                              | 5  |
| <b>Figure S1.</b> Hepatoprotective effects of HTM (1) against damage induced by CCl <sub>4</sub> in HepG2 cells .....                  | 8  |
| <b>Table S3.</b> <sup>13</sup> C (150 MHz) and <sup>1</sup> H (600 MHz) NMR data for HTM (1) .....                                     | 10 |
| <b>Figure S2.</b> Key COSY and HMBC correlation of HTM (1).....                                                                        | 11 |
| <b>Figure S3.</b> ESI-HRMS spectrum of HTM (1).....                                                                                    | 12 |
| <b>Figure S4.</b> <sup>1</sup> H NMR spectrum of HTM (1) (600 MHz, (CD <sub>3</sub> ) <sub>2</sub> SO) .....                           | 12 |
| <b>Figure S5.</b> <sup>13</sup> C NMR spectrum of HTM (1) (150 MHz, (CD <sub>3</sub> ) <sub>2</sub> SO).....                           | 13 |
| <b>Figure S6.</b> HSQC spectrum of HTM (1) (600 MHz, (CD <sub>3</sub> ) <sub>2</sub> SO).....                                          | 13 |
| <b>Figure S7.</b> <sup>1</sup> H- <sup>1</sup> H COSY spectrum of HTM (1) (600 MHz, (CD <sub>3</sub> ) <sub>2</sub> SO) .....          | 14 |
| <b>Figure S8.</b> HMBC spectrum of HTM (1) (600 MHz, (CD <sub>3</sub> ) <sub>2</sub> SO).....                                          | 14 |
| <b>Figure S9.</b> ROESY spectrum of HTM (1) (600 MHz, (CD <sub>3</sub> ) <sub>2</sub> SO).....                                         | 15 |
| <b>Scheme S1.</b> a) Putative degradation of hangtaimycin to sarmentosamide (HTM <sub>222</sub> ). b) Synthesis of sarmentosamide..... | 16 |
| <b>Figure S10.</b> <sup>1</sup> H NMR spectrum (500 MHz, CD <sub>3</sub> OD) of <b>S2</b> .....                                        | 21 |
| <b>Figure S11.</b> <sup>13</sup> C NMR spectrum (126 MHz, CD <sub>3</sub> OD) of <b>S2</b> .....                                       | 21 |
| <b>Figure S12.</b> <sup>13</sup> C-DEPT-135 NMR spectrum (126 MHz, CD <sub>3</sub> OD) of <b>S2</b> .....                              | 22 |
| <b>Figure S13.</b> <sup>1</sup> H NMR spectrum (500 MHz, CDCl <sub>3</sub> ) of <b>S3</b> .....                                        | 22 |
| <b>Figure S14.</b> <sup>13</sup> C NMR spectrum (126 MHz, CDCl <sub>3</sub> ) of <b>S3</b> .....                                       | 23 |
| <b>Figure S15.</b> <sup>13</sup> C-DEPT-135 NMR spectrum (126 MHz, CDCl <sub>3</sub> ) of <b>S3</b> .....                              | 23 |
| <b>Figure S16.</b> <sup>1</sup> H NMR spectrum (500 MHz, CDCl <sub>3</sub> ) of <b>S4</b> .....                                        | 24 |
| <b>Figure S17.</b> <sup>13</sup> C NMR spectrum (126 MHz, CDCl <sub>3</sub> ) of <b>S4</b> .....                                       | 24 |
| <b>Figure S18.</b> <sup>13</sup> C-DEPT-135 NMR spectrum (126 MHz, CDCl <sub>3</sub> ) of <b>S4</b> .....                              | 25 |
| <b>Figure S19.</b> <sup>1</sup> H NMR spectrum (500 MHz, CD <sub>3</sub> OD) of <b>S5</b> .....                                        | 25 |
| <b>Figure S20.</b> <sup>13</sup> C NMR spectrum (126 MHz, CD <sub>3</sub> OD) of <b>S5</b> .....                                       | 26 |
| <b>Figure S21.</b> <sup>13</sup> C-DEPT-135 NMR spectrum (126 MHz, CD <sub>3</sub> OD) of <b>S5</b> .....                              | 26 |
| <b>Figure S22.</b> <sup>1</sup> H NMR spectrum (700 MHz, CDCl <sub>3</sub> ) of <b>S12</b> .....                                       | 27 |
| <b>Figure S23.</b> <sup>13</sup> C NMR spectrum (176 MHz, CDCl <sub>3</sub> ) of <b>S12</b> .....                                      | 27 |
| <b>Figure S24.</b> <sup>13</sup> C-DEPT-135 NMR spectrum (176 MHz, CDCl <sub>3</sub> ) of <b>S12</b> .....                             | 28 |
| <b>Figure S25.</b> <sup>1</sup> H NMR spectrum (700 MHz, CDCl <sub>3</sub> ) of <b>4</b> .....                                         | 28 |
| <b>Figure S26.</b> <sup>13</sup> C NMR spectrum (176 MHz, CDCl <sub>3</sub> ) of <b>4</b> .....                                        | 29 |
| <b>Figure S27.</b> <sup>13</sup> C-DEPT-135 NMR spectrum (176 MHz, CDCl <sub>3</sub> ) of <b>4</b> .....                               | 29 |
| <b>Figure S28.</b> <sup>1</sup> H NMR spectrum (500 MHz, CD <sub>3</sub> OD) of <b>S7</b> .....                                        | 30 |
| <b>Figure S29.</b> <sup>13</sup> C NMR spectrum (126 MHz, CD <sub>3</sub> OD) of <b>S7</b> .....                                       | 30 |
| <b>Figure S30.</b> <sup>13</sup> C-DEPT-135 NMR spectrum (126 MHz, CD <sub>3</sub> OD) of <b>S7</b> .....                              | 31 |
| <b>Figure S31.</b> <sup>1</sup> H- <sup>1</sup> H COSY spectrum (500 MHz, CD <sub>3</sub> OD) of <b>S7</b> .....                       | 31 |
| <b>Figure S32.</b> HSQC spectrum (CD <sub>3</sub> OD) of <b>S7</b> .....                                                               | 32 |
| <b>Figure S33.</b> HMBC spectrum (CD <sub>3</sub> OD) of <b>S7</b> .....                                                               | 32 |
| <b>Figure S34.</b> NOESY spectrum (CD <sub>3</sub> OD) of <b>S7</b> .....                                                              | 33 |
| <b>Figure S35.</b> <sup>1</sup> H NMR spectrum (500 MHz, CD <sub>3</sub> OD) of <b>S8</b> .....                                        | 33 |
| <b>Figure S36.</b> <sup>13</sup> C NMR spectrum (126 MHz, CD <sub>3</sub> OD) of <b>S8</b> .....                                       | 34 |
| <b>Figure S37.</b> <sup>13</sup> C-DEPT-135 NMR spectrum (126 MHz, CD <sub>3</sub> OD) of <b>S8</b> .....                              | 34 |
| <b>Figure S38.</b> <sup>1</sup> H- <sup>1</sup> H COSY spectrum (500 MHz, CD <sub>3</sub> OD) of <b>S8</b> .....                       | 35 |

## SUPPORTING INFORMATION

|                                                                                                                                                                                                                                                               |    |
|---------------------------------------------------------------------------------------------------------------------------------------------------------------------------------------------------------------------------------------------------------------|----|
| <b>Figure S39.</b> HSQC spectrum (CD <sub>3</sub> OD) of <b>S8</b> .....                                                                                                                                                                                      | 35 |
| <b>Figure S40.</b> HMBC spectrum (CD <sub>3</sub> OD) of <b>S8</b> .....                                                                                                                                                                                      | 36 |
| <b>Figure S41.</b> NOESY spectrum (CD <sub>3</sub> OD) of <b>S8</b> .....                                                                                                                                                                                     | 36 |
| <b>Figure S42.</b> <sup>1</sup> H NMR spectrum (700 MHz, CD <sub>3</sub> OD) of HTM <sub>222</sub> .....                                                                                                                                                      | 37 |
| <b>Figure S43.</b> <sup>13</sup> C NMR spectrum (176 MHz, CD <sub>3</sub> OD) of HTM <sub>222</sub> .....                                                                                                                                                     | 37 |
| <b>Figure S44.</b> <sup>13</sup> C-DEPT-135 NMR spectrum (176 MHz, CD <sub>3</sub> OD) of HTM <sub>222</sub> .....                                                                                                                                            | 38 |
| <b>Figure S45.</b> <sup>1</sup> H- <sup>1</sup> H COSY spectrum (700 MHz, CD <sub>3</sub> OD) of HTM <sub>222</sub> .....                                                                                                                                     | 38 |
| <b>Figure S46.</b> HSQC spectrum (CD <sub>3</sub> OD) of HTM <sub>222</sub> .....                                                                                                                                                                             | 39 |
| <b>Figure S47.</b> HMBC spectrum (CD <sub>3</sub> OD) of HTM <sub>222</sub> .....                                                                                                                                                                             | 39 |
| <b>Figure S48.</b> NOESY spectrum (CD <sub>3</sub> OD) of HTM <sub>222</sub> .....                                                                                                                                                                            | 40 |
| <b>Figure S49.</b> Identification of HTM <sub>222</sub> by LC-ESI-HRMS.....                                                                                                                                                                                   | 41 |
| <b>Table S4.</b> Deduced functions of ORFs in putative HTM biosynthetic gene cluster.....                                                                                                                                                                     | 42 |
| <b>Figure S50.</b> Deletion of the entire HTM biosynthetic gene cluster and its verification.....                                                                                                                                                             | 44 |
| <b>Figure S51.</b> Scheme presentation of <i>htmA7</i> deletion and verification.....                                                                                                                                                                         | 44 |
| <b>Figure S52.</b> Site-directed mutation of DH <sub>1</sub> in module 1 of HtmA1.....                                                                                                                                                                        | 45 |
| <b>Figure S53.</b> Site-directed mutation of KR <sub>1</sub> in module 1 of HtmA1.....                                                                                                                                                                        | 45 |
| <b>Figure S54.</b> The partial sequence alignment of KS in HTM PKS.....                                                                                                                                                                                       | 46 |
| <b>Figure S55.</b> Site-directed mutation of KR <sub>2</sub> in module 2 of HtmA1.....                                                                                                                                                                        | 46 |
| <b>Figure S56.</b> Site-directed mutation of DH <sub>3</sub> in module 3 of HtmA1.....                                                                                                                                                                        | 47 |
| <b>Figure S57.</b> Site-directed mutation of ACP <sub>2</sub> in module 2 of HtmA1.....                                                                                                                                                                       | 47 |
| <b>Figure S58.</b> Site-directed mutation of ACP <sub>3</sub> in module 3 of HtmA1.....                                                                                                                                                                       | 48 |
| <b>Figure S59.</b> Site-directed mutation of KS <sub>3</sub> in module 3 of HtmA1.....                                                                                                                                                                        | 48 |
| <b>Figure S60.</b> Proposed mechanism of the dehydrating bimodule (modules 2 and 3) of HtmA1.....                                                                                                                                                             | 49 |
| <b>Figure S61.</b> SDS-PAGE analysis of all recombinant enzymes used in this study.....                                                                                                                                                                       | 50 |
| <b>Figure S62.</b> <sup>1</sup> H NMR spectrum of compound <b>2</b> (400 MHz, (CD <sub>3</sub> ) <sub>2</sub> SO).....                                                                                                                                        | 51 |
| <b>Figure S63.</b> <sup>13</sup> C NMR spectrum of compound <b>2</b> (150 MHz, (CD <sub>3</sub> ) <sub>2</sub> SO).....                                                                                                                                       | 52 |
| <b>Figure S64.</b> ESI-HRMS of compound <b>2</b> .....                                                                                                                                                                                                        | 53 |
| <b>Scheme S2.</b> Preparation of a) ( <i>rac</i> )- <b>3</b> and b) enantiomerically enriched ( <i>R</i> )- <b>3</b> by kinetic resolution through Sharpless epoxidation of ethyl ( <i>rac</i> )-3-hydroxyhex-4-enoate ( <b>S13</b> ) and saponification..... | 54 |
| <b>Figure S65.</b> <sup>1</sup> H NMR spectrum of compound <b>3</b> (400 MHz, CD <sub>3</sub> OD).....                                                                                                                                                        | 56 |
| <b>Figure S66.</b> <sup>13</sup> C NMR spectrum of compound <b>3</b> (100 MHz, CD <sub>3</sub> OD).....                                                                                                                                                       | 56 |
| <b>Figure S67.</b> ESI-HRMS of compound <b>3</b> .....                                                                                                                                                                                                        | 57 |
| <b>Figure S68.</b> Confirmation of configuration of C3-hydroxy group in the product <b>3</b> from in vitro assay of <i>holo</i> -module 2 with synthetic <b>2</b> by chiral HPLC analysis.....                                                                | 57 |
| <b>Scheme S3.</b> Preparation of ( <i>S</i> )- <b>3</b> and ( <i>R</i> )- <b>3</b> by Evans' acyl oxazolidinone.....                                                                                                                                          | 58 |
| <b>Figure S69.</b> <sup>1</sup> H NMR spectrum of compound <b>S14</b> (500 MHz, CDCl <sub>3</sub> ).....                                                                                                                                                      | 60 |
| <b>Figure S70.</b> <sup>13</sup> C NMR spectrum of compound <b>S14</b> (125 MHz, CDCl <sub>3</sub> ).....                                                                                                                                                     | 60 |
| <b>Figure S71.</b> <sup>1</sup> H NMR spectrum of compound ( <i>S</i> )- <b>S15</b> (500 MHz, C <sub>6</sub> D <sub>6</sub> ).....                                                                                                                            | 61 |
| <b>Figure S72.</b> <sup>13</sup> C NMR spectrum of compound ( <i>S</i> )- <b>S15</b> (125 MHz, C <sub>6</sub> D <sub>6</sub> ).....                                                                                                                           | 61 |
| <b>Figure S73.</b> <sup>1</sup> H NMR spectrum of compound ( <i>R</i> )- <b>S15</b> (500 MHz, C <sub>6</sub> D <sub>6</sub> ).....                                                                                                                            | 62 |
| <b>Figure S74.</b> <sup>13</sup> C NMR spectrum of compound ( <i>R</i> )- <b>S15</b> (125 MHz, C <sub>6</sub> D <sub>6</sub> ).....                                                                                                                           | 62 |
| <b>Figure S75.</b> <sup>1</sup> H NMR spectrum of compound <b>3</b> (500 MHz, C <sub>6</sub> D <sub>6</sub> ).....                                                                                                                                            | 63 |
| <b>Figure S76.</b> <sup>13</sup> C NMR spectrum of compound <b>3</b> (125 MHz, C <sub>6</sub> D <sub>6</sub> ).....                                                                                                                                           | 63 |
| <b>Figure S77.</b> <sup>1</sup> H NMR spectrum of compound <b>S16</b> (500 MHz, CDCl <sub>3</sub> ).....                                                                                                                                                      | 64 |
| <b>Figure S78.</b> <sup>13</sup> C NMR spectrum of compound <b>S16</b> (125 MHz, CDCl <sub>3</sub> ).....                                                                                                                                                     | 64 |
| <b>References</b> .....                                                                                                                                                                                                                                       | 65 |
| <b>Author Contributions</b> .....                                                                                                                                                                                                                             | 65 |

## SUPPORTING INFORMATION

**Bacterial strains, plasmids and DNA manipulation.** Bacterial strains and plasmids of this study are summarized in Table S1. DNA manipulations were performed using standard procedures for *E. coli* and *Streptomyces*. The chemical reagents and antibiotics were purchased from Sigma-Aldrich. The test kits for alanine aminotransferase (ALT) and aspartate aminotransferase (AST) activity were purchased from Nanjing Jiancheng Bioengineering Institute. Oligonucleotide primers used in this study (Table S2) were synthesized by Tsingke. DNA sequencing of PCR products was recorded by Tsingke.

**Table S1.** Bacterial strains and plasmids used in this study.

| Strain/Plasmid                     | Characteristic                                                                                       | Reference  |
|------------------------------------|------------------------------------------------------------------------------------------------------|------------|
| <b><i>Escherichia coli</i></b>     |                                                                                                      |            |
| DH10B                              | Host for general cloning                                                                             | Invitrogen |
| ET12567/pUZ8002                    | Donor strain for conjugation between <i>E. coli</i> and <i>Streptomyces</i>                          | [1]        |
| BL21 (DE3)                         | Host for protein expression                                                                          | Invitrogen |
| BAP1                               | Host for protein expression                                                                          | [2]        |
| pGro7                              | Host for protein expression                                                                          | Takara     |
| <b><i>Streptomyces</i></b>         |                                                                                                      |            |
| <b><i>spectabilis</i></b>          |                                                                                                      |            |
| CCTCC M2017417                     | Hangtairymin (HTM) producing wild-type strain                                                        | [3]        |
| $\Delta$ htm                       | HTM biosynthetic gene cluster deletion mutant strain                                                 | Figure S50 |
| $\Delta$ htmA7                     | <i>htmA7</i> in-frame deletion mutant strain                                                         | Figure S51 |
| DH <sub>1</sub> (H26A)             | Site-directed mutation strain of DH <sub>1</sub> in module 1 of HtmA1                                | Figure S52 |
| KR <sub>1</sub> (G10A, G12A, G15A) | Site-directed mutation strain of KR <sub>1</sub> in module 1 of HtmA1                                | Figure S53 |
| KR <sub>2</sub> (Y168A)            | Site-directed mutation strain of KR <sub>2</sub> in module 2 of HtmA1                                | Figure S55 |
| DH <sub>3</sub> (H25A)             | Site-directed mutation strain of DH <sub>3</sub> in module 3 of HtmA1                                | Figure S56 |
| ACP <sub>2</sub> (S40A)            | Site-directed mutation strain of ACP <sub>2</sub> in module 2 of HtmA1                               | Figure S57 |
| ACP <sub>3</sub> (D43L, S44A)      | Site-directed mutation strain of ACP <sub>3</sub> in module 3 of HtmA1                               | Figure S58 |
| $\Delta$ KS <sub>3</sub> (C155A)   | Site-directed mutation strain of KS <sub>3</sub> in module 3 of HtmA1                                | Figure S59 |
| <b>Plasmid</b>                     |                                                                                                      |            |
| pYH7                               | <i>Streptomyces-E. coli</i> shuttle vector                                                           | [4]        |
| pET28a(+)                          | Vector for protein expression                                                                        | Invitrogen |
| pWHU5001                           | Recombinant plasmid used for HTM biosynthetic gene cluster deletion in vivo                          | Figure S50 |
| pWHU5002                           | Recombinant plasmid used for <i>htmA7</i> in vivo in-frame deletion                                  | Figure S51 |
| pWHU5003                           | Recombinant plasmid used for in vivo site-directed mutation of DH <sub>1</sub> in module 1 of HtmA1  | Figure S52 |
| pWHU5004                           | Recombinant plasmid used for in vivo site-directed mutation of KR <sub>1</sub> in module 1 of HtmA1  | Figure S53 |
| pWHU5005                           | Recombinant plasmid used for in vivo site-directed mutation of KR <sub>2</sub> in module 2 of HtmA1  | Figure S55 |
| pWHU5006                           | Recombinant plasmid used for in vivo site-directed mutation of DH <sub>3</sub> in module 3 of HtmA1  | Figure S56 |
| pWHU5007                           | Recombinant plasmid used for in vivo site-directed mutation of ACP <sub>2</sub> in module 2 of HtmA1 | Figure S57 |
| pWHU5008                           | Recombinant plasmid used for in vivo site-directed mutation of ACP <sub>3</sub> in module 3 of HtmA1 | Figure S58 |
| pWHU5009                           | Recombinant plasmid used for in vivo site-directed mutation of KS <sub>3</sub> in module 3 of HtmA1  | Figure S59 |
| pWHU5011                           | Recombinant plasmid used for module 1 protein expression in <i>E. coli</i>                           | This work  |
| pWHU5012                           | Recombinant plasmid used for module 2 protein expression in <i>E. coli</i>                           | This work  |
| pWHU5013                           | Recombinant plasmid used for module 3 protein expression in <i>E. coli</i>                           | This work  |
| pWHU5014                           | Recombinant plasmid used for module 3 KS <sub>3</sub> (C155A) protein expression in <i>E. coli</i>   | Figure S59 |
| pWHU5015                           | Recombinant plasmid used for HtmA7 ( <i>trans</i> -ATs) protein expression in <i>E. coli</i>         | This work  |

## SUPPORTING INFORMATION

**Table S2.** List of oligonucleotide primers used in this study.

| Primer                       | Oligonucleotide sequence (5' to 3')                          | Restriction site    |
|------------------------------|--------------------------------------------------------------|---------------------|
| htm-L-up                     | TCAAGGCGAATACTT <b>CATATG</b> GCGCGGCTGATCGGCCGACG           | <i>NdeI</i>         |
| htm-L-re                     | GTGCGGGCCCCCGCCGAAAGGCCACGCGC                                |                     |
| htm-R-up                     | CTTTCGGCGGGGGCCCGCACCCCAGAGGCA                               |                     |
| htm-R-re                     | GAC <b>CTGCAGGC</b> ATGCA <b>AAGCTT</b> TCTCCTCGTCCGACGTCGTC | <i>PstI/HindIII</i> |
| htmA7-L-up                   | AAGGCGAATACTT <b>CATATG</b> TCGTGCTGCCCTTCCTGAT              | <i>NdeI</i>         |
| htmA7-L-re                   | TTGAGGAAGTTCAGCGAGTAGCCGAGCAGCC                              |                     |
| htmA7-R-up                   | CTACTCGCTGAACTTCTCAAGCACGGCTA                                |                     |
| htmA7-R-re                   | TGCAGGCATGCA <b>AAGCTT</b> AAGTACACCGCGCAGGCCCT              | <i>HindIII</i>      |
| KR <sub>1</sub> -L-up        | AGGCGAATACTT <b>CATATG</b> CCCTCGATGGTCGTCCTGT               | <i>NdeI</i>         |
| KR <sub>1</sub> -L-re        | GGCGAGGCCAGCGCCTGGCCGGTGTAGAGGTACACGC                        |                     |
| KR <sub>1</sub> -R-up        | GCCAGGCGCTGGGCCCTGCCCGATCTTCGCCAGGGACATCG                    |                     |
| KR <sub>1</sub> -R-re        | CTGCAGGCATGCA <b>AAGCTT</b> CGTGTAGCCGTTGGTGCG               | <i>HindIII</i>      |
| DH <sub>1</sub> (H26A)-L-up  | AGGCGAATACTT <b>CATATG</b> CCATGCGCCGGACGCCCGGC              | <i>NdeI</i>         |
| DH <sub>1</sub> (H26A)-L-re  | CCGCC <b>ACCCGAG</b> CGTCGCGCAGGAAGAAG                       | <i>AvaI</i>         |
| DH <sub>1</sub> (H26A)-R-up  | GCGCGACG <b>CTCGGGT</b> GCGGGGCGAGC                          | <i>AvaI</i>         |
| DH <sub>1</sub> (H26A)-R-re  | CTGCAGGCATGCA <b>AAGCTT</b> GTGGCGCGGTGGCGTGCGAAC            | <i>HindIII</i>      |
| KR <sub>2</sub> (Y168A)-L-up | CAAGGCGAATACTT <b>CATATG</b> CGCTGCACTCCGCGACGCTC            | <i>NdeI</i>         |
| KR <sub>2</sub> (Y168A)-L-re | TGCCCATAGCGGCGTCGCTCTGTCCGGCGCCG                             |                     |
| KR <sub>2</sub> (Y168A)-R-up | GCGACGCCGCTATGGGCAACGCCCTTCATGGAC                            |                     |
| KR <sub>2</sub> (Y168A)-R-re | ACCTGCAGGCATGCA <b>AAGCTT</b> CGTCGACGCGCCGCGTCCAC           | <i>HindIII</i>      |
| DH <sub>3</sub> (H25A)-L-up  | AGGCGAATACTT <b>CATATG</b> CGTCACCAGCGTCCAGTGG               | <i>NdeI</i>         |
| DH <sub>3</sub> (H25A)-L-re  | CGTAG <b>ACGCGT</b> GCTCCGTCCACGACGGC                        | <i>MluI/AflIII</i>  |
| DH <sub>3</sub> (H25A)-R-up  | GGACGGAGC <b>ACGCGT</b> CTACGGACGGCGGCT                      | <i>MluI/AflIII</i>  |
| DH <sub>3</sub> (H25A)-R-re  | CTGCAGGCATGCA <b>AAGCTT</b> GCGTACACGGCGTCACCG               | <i>HindIII</i>      |
| ACP <sub>2</sub> (S40A)-L-up | CAAGGCGAATACTT <b>CATATG</b> GACACCGCCGTCGACGGCGT            | <i>NdeI</i>         |
| ACP <sub>2</sub> (S40A)-L-re | GAGCAGGAACGCGTCGGCGCCGTAGTCGGCG                              |                     |
| ACP <sub>2</sub> (S40A)-R-up | GCCGACGCGTTCCTGCTCGCGCAGGTCCTC                               |                     |
| ACP <sub>2</sub> (S40A)-R-re | ACCTGCAGGCATGCA <b>AAGCTT</b> CGAGTGCACGAGCTCCTGCG           | <i>HindIII</i>      |
| KS <sub>3</sub> (C155A)-L-up | CAAGGCGAATACTT <b>CATATG</b> GCGAAGGCGTCGCGGGACGT            | <i>NdeI</i>         |
| KS <sub>3</sub> (C155A)-L-re | TGAGCGCGGAGCTAGCGGCGGTGTCCATGACCATGG                         |                     |
| KS <sub>3</sub> (C155A)-R-up | TGGACACCGCCGCTAGCTCCGCGCTCACGGCGATGAA                        |                     |
| KS <sub>3</sub> (C155A)-R-re | ACCTGCAGGCATGCA <b>AAGCTT</b> CCGGTGCCGCGAGGCTCGTG           | <i>HindIII</i>      |
| ACP <sub>3</sub> -L-up       | CAAGGCGAATACTT <b>CATATG</b> GGCTCGCGCACCGGCGTGTA            | <i>NdeI</i>         |
| ACP <sub>3</sub> -L-re       | CAGCGTCGCCGCTAGCAGGCCGAGCGCGTAGT                             |                     |
| ACP <sub>3</sub> -R-up       | GCCTGCTAGCGGCGACGCTGCTGCGGATCGC                              |                     |

## SUPPORTING INFORMATION

|                                    |                                                       |                |
|------------------------------------|-------------------------------------------------------|----------------|
| ACP <sub>3</sub> -R-re             | ACCTGCAGGCATGCAAGCTTGGTACGTGGGCAGGTGCGCG              | <i>HindIII</i> |
| htm-confirm-up                     | TCGTCATCGGTACGGAAGAGG                                 |                |
| htm-confirm-re                     | GCGGAGTTCTGGTTCCGAGATG                                |                |
| htmA7-confirm-up                   | CCCAAGCAGAAGATGGCCCACG                                |                |
| htmA7-confirm-re                   | TGACCGGCCTGATCCGAGTG                                  |                |
| KR1-comfirm-up                     | TCCTCCAGGTCCTCACCCACG                                 |                |
| KR1-comfirm-re                     | CCCATGACGGACGAGAACAGC                                 |                |
| DH <sub>1</sub> (H26A)-confirm-up  | CGGTGTCTGACTGGGAGGC                                   |                |
| DH <sub>1</sub> (H26A)-confirm-re  | CGCAGCGTGGCGTAGAAGT                                   |                |
| KR <sub>2</sub> (Y168A)-confirm-up | CTGTGCGCCCAGCACTTCGT                                  |                |
| KR <sub>2</sub> (Y168A)-confirm-re | CCTCGTCCAACCTGGCCTGACTT                               |                |
| DH <sub>3</sub> (H25A)-confirm-up  | GAGGGCATCGCCGCCTTCAT                                  |                |
| DH <sub>3</sub> (H25A)-confirm-re  | CACCGAGCCGACGACCTTCAT                                 |                |
| ACP <sub>2</sub> (S40A)-confirm-up | TCGGCGAGGTCACGAACAAGA                                 |                |
| ACP <sub>2</sub> (S40A)-confirm-re | TCGGCGTGCAGCATGAAGTG                                  |                |
| KS <sub>3</sub> (C155A)-confirm-up | CCTGGCTGCTCGACACCTATCC                                |                |
| KS <sub>3</sub> (C155A)-confirm-re | CCTCCCGCATCACCTGCTTCT                                 |                |
| ACP <sub>3</sub> -comfire-up       | GTTTCGTTCCACCCGGCATTG                                 |                |
| ACP <sub>3</sub> -comfire-re       | GCGCCCGGACTTGAGTTCT                                   |                |
| HtmM1-up                           | TGCCGCGCGGCAGCC <b>CATATG</b> CTCAGGGGCGAGGAAACAAGCCA | <i>NdeI</i>    |
| HtmM1-re                           | CGGGCCCCGCGGGCCACGTGGCCCGGTGGCCGCCGAGGA               |                |
| HtmM2-up                           | GTGCCGCGCGGCAGCC <b>CATATG</b> TCCGCCCTGGACATCGCC     | <i>NdeI</i>    |
| HtmM2-re                           | TGTCGACGGAGCTCGAATTCTCACTCGGCGGGATAGGTGTCG            |                |
| HtmM3-up                           | GTGCCGCGCGGCAGCC <b>CATATG</b> CACAGGGTCGCCGTGGTCGGC  | <i>NdeI</i>    |
| HtmM3-re                           | TGTCGACGGAGCTCGAATTCTCACGCAGGCTCGTGGTGGCGG            |                |

Nucleotides in bold type are restriction sites introduced.

## SUPPORTING INFORMATION

**Culture and fermentation conditions.** For hangtaimycin (HTM, **1**) production, the wild-type of *Streptomyces spectabilis* CCTCC M2017417, which was maintained on ABB13 plates (0.5% soytone, 0.5% soluble starch, 0.3% CaCO<sub>3</sub>, 0.2% MOPS, 2% agar), was grown in TSBY liquid medium (3% tryptone soy broth, 10.3% sucrose, 0.5% yeast extract) at 28 °C with shaking of 220 rpm for 20 h as seed culture. It was then inoculated to the SFMR medium (2% soya flour, 2% mannitol, 5% AB-8 macroporous adsorption resin) and incubated for another 4 days on the fermentation condition of 28 °C and 220 rpm. *E. coli* strains were cultured in 2xTY (1.6% tryptone, 1% yeast extract, 0.5% NaCl) or on 2xTY agar medium at 37 °C with the appropriate antibiotic at a concentration of 100 µg/mL ampicillin, 35 µg/mL apramycin, 50 µg/mL kanamycin, 25 µg/mL chloramphenicol, or 30 µg/mL nalidixic acid for selection.

**LC-ESI-HRMS analysis of the extracts of wild-type and mutant strains.** After fermentation in SFMR medium for 4 days, the cultures of wild-type and mutant strains were extracted with equal ethyl acetate. The extracts were obtained after the ethyl acetate evaporated under reduced pressure. Subsequently, the extracts were dissolved in 1.5 mL CH<sub>3</sub>CN and analyzed, respectively, by LC-ESI-HRMS on a Thermo Electron LTQ-Orbitrap XL mass spectrometer equipment with a Phenomenex Luna C18 column (250x4.6 mm) eluting with a linear gradient elution system of CH<sub>3</sub>CN/H<sub>2</sub>O (0-20 min, 35-65% B; 20-28 min, 65-95% B; 28-30 min, 95% B; 30-33 min, 95-35% B; 33-38 min, 35% B) at a flow rate of 1 mL/min. LC-ESI-HRMS analyses were carried out in the positive ionization mode with 35% relative collision energy.

**Isolation of HTM from *S. spectabilis* CCTCC M2017417.** After fermentation in modified SFMR medium (8 L) for 4 days at 28 °C and 220 rpm, the fermentation extracts were filtered with 40 mesh sieve to separate the broth, mycelium and resin. The supernatant was then extracted with an equal volume of ethyl acetate. The mycelium and the resin were also extracted with ethyl acetate. After evaporation to dryness under reduced pressure, the residues obtained from the culture supernatant, the mycelium and the resin were combined and subjected to silica gel CC to obtain eight fractions (Fr.A1–Fr.A8) eluting with a mixture of CH<sub>2</sub>Cl<sub>2</sub>/CH<sub>3</sub>CN (100:0, 98:2, 96:4, 92:8, 90:10, 80:20, 70:30, 50:50, v/v). Fr.A7+Fr.A8 were combined and subjected to MPLC with an ODS column eluting with CH<sub>3</sub>CN/H<sub>2</sub>O (0–20 min, 0:100–40:60; 20–45 min, 40:60–80:20; 45–60 min, 80:20–100:0; v/v) at a flow rate of 15 mL/min to get Fr.B1–B16. Fr.B8–B9 were combined and further purified with preparative HPLC eluting with a mixture of CH<sub>3</sub>CN/H<sub>2</sub>O (0–20 min, 45:55–55:45) at a flow rate of 3 mL/min to yield HTM at 17.5 min with a yield of 15.5 mg. Finally, the purified HTM were recorded of its NMR and LC-ESI-HRMS spectra for structure elucidation.

**Hepatoprotective effect in vitro.** Human hepatoma cell line HepG2 (Wuhan Hua Lian Biotechnology Co., Ltd) were seeded into 24-well plates and cultured in Dulbecco's Modified Eagle Medium with High Glucose (DMEM-HG, TBD10569) supplemented with 10% fetal bovine serum (FBS, Hangzhou Sijiqing Bio-logical Engineering Materials Co., Ltd.), and incubated under 5% CO<sub>2</sub> at 37 °C. In vitro liver injury model was built based on literatures with some modification.<sup>[5,6]</sup> After 24 hours incubation, the supernatant was replaced with culture medium containing CCl<sub>4</sub> (70%) and incubated for 4 h except the control group. To identify the hepatoprotective effect of HTM, cells were then treated with HTM for 4 h. Silymarin was used as positive control for the liver protective effects. The activities of ALT and AST were measured by reading the absorbance at 510 nm with Microplate Spectrophotometer (Bioteck EON). All results are presented as the mean ± standard error of mean (SEM). Statistical analyses of the data with equal variances were carried out by one-way or two-way analysis of variance (ANOVA), followed by Tukey's post-hoc test where appropriate. P<0.001 was considered most significant, P<0.01 very significant, P<0.05 significant and P>0.05 indicated no statistical difference.

## SUPPORTING INFORMATION

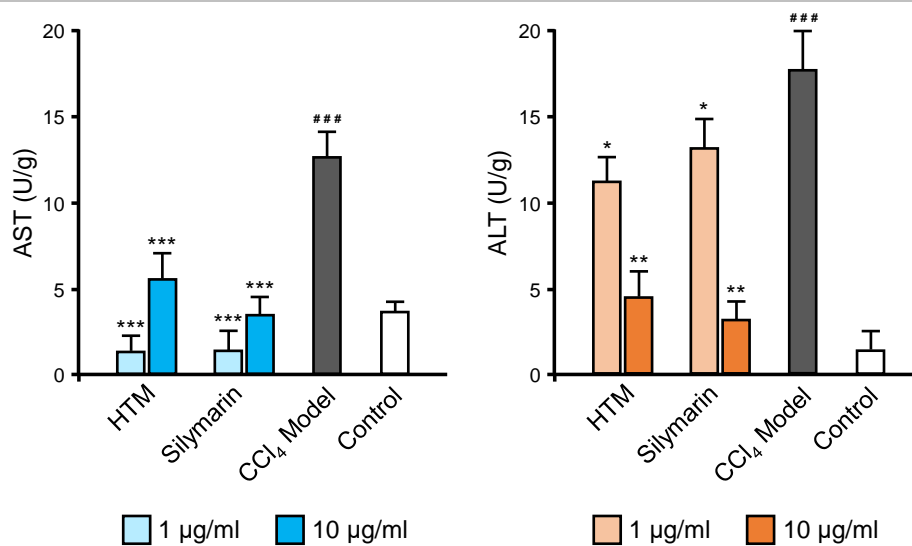

**Figure S1.** Hepatoprotective effects of HTM (1) against damage induced by CCl<sub>4</sub> in HepG2 cells. After treated with HTM and silymarin (positive control) for 4 hours, the activity of ALT (A) and AST (B) of HepG2 cells were measured using assay kits. The values are the mean  $\pm$  SD. ###,  $P < 0.001$  vs control; \*,  $P < 0.05$  vs CCl<sub>4</sub>; \*\*,  $P < 0.01$  vs CCl<sub>4</sub>; \*\*\*,  $P < 0.001$  vs CCl<sub>4</sub>,  $n = 3$ .



## SUPPORTING INFORMATION

**NMR analysis of HTM and synthetic compounds.** The 1D and 2D NMR spectra of the purified HTM, synthesis substrates and standards were performed on an Agilent 400/600MR DD2 NMR spectrometer. Chemical shifts ( $\delta$ ) are given in ppm with reference to TMS. NMR data processing was obtained by MestReNova software.

**Structure elucidation of HTM.** HTM was obtained as white powder. It had a molecular formula of  $C_{50}H_{61}N_7O_{11}$  deduced from its protonated ion at  $m/z$  936.4523 ( $[M+H]^+$ ) observed in its the LC-ESI-HRMS (calcd. for  $C_{50}H_{62}N_7O_{11}$ , 936.4502). The  $^1H$ -NMR spectrum of HTM unveiled signals for 18 olefinic proton signals, 5 amino/amide proton signals, seven methyl groups (including one oxygenated methyl group at  $\delta_H$  3.18 and one nitrogenated methyl group at  $\delta_H$  2.94), five methylene and six methine proton signals. The  $^{13}C$ -NMR and HSQC spectrum of HTM further assigned the signals unveiled by  $^1H$ -NMR spectrum, and also revealed 15 quaternary carbons, including 8 amide or ester carbonyls, together with 7 sp<sup>2</sup> carbons. The  $^1H$ - $^1H$  COSY correlations of NH-1/H-2, H-4/H-5/H-6/H-7, together with the HMBC correlations of NH-1/C-3, C-9; H-2/C-3, C-8 and C-9; H-4/C-3, C-6, C-8, C-9; H-5/C-4, C-6, C-7, C-9; H-7/C-5, C-6, C-8, C-9 indicate presence of a C-3-substituted indolyl moiety. The chemical shift of the two amide carbonyls at  $\delta_C$  162.3 (C-13), 172.1 (C-16), together with the HMBC correlation of H3-18/C-17, C-14; H-17/C-13, C-14, C-18; H-11/C-3, C-10, C-13, C-16; N-CH3/C-11, C-13 suggested the presence of a cyclodipeptide (*N*-methyltryptophan-dehydrothreonine) moiety. The left signals were assigned as five fragments of C-20/C-21(21-OCH<sub>3</sub>)/C-22; C-25/C-26; C-29/C-30/C-31/C-32/C-33/C-34/C-35; C-37/C-38/C-42; C-45/C-46/C-47/C-48/C-49; C-52/C-53/C-54/C-55/C-56 according to the COSY and HMBC correlations of HTM. The HMBC correlations of H-20/C-19, C-24; NH-23/C-19, C-20, C-24; NH-27/C-24, C-25, C-28, C-29; H-29/C-28; H-35/C-36, C-37, C-40, C-41; H-38/C-40, C-36; H-42/C-44; H-46/C-44, C-47; H-47/C-44, C-48, C-49; H-48/C-47, C-51; NH-50/C-48, C-51, C52 linked these fragments as a long fragment of C19-C56. This long fragment was further connected to the cyclodipeptide moiety via C-19, which was suggested by its chemical shift of  $\delta_C$  167.0 (C-19). The NMR data of HTM were nearly the same with that of HTM reported previously.<sup>[7]</sup> By careful comparison and analysis, we confirmed that HTM was HTM and revised the chemical structure of HTM of the published structure with respect to the  $\Delta^{29,30}$  double bond configuration according to the NMR data. As showed in the NMR datasets (Table S3), there is no  $^1H$ - $^1H$  ROESY's correlations between H<sub>29</sub> and H<sub>30</sub>, and the coupling constants for H<sub>30</sub> (dd, 15.0, 10.2 Hz) also indicate an *E* configuration for the  $\Delta^{29,30}$  double bond. Although the signals for H<sub>29</sub> were unfortunately overlapped, but the 15.0 Hz coupling constant could only be for the coupling constants of  $^3J_{H-29/H-30}$ . The other coupling constant of 10.2 Hz must be for the coupling constants of  $^3J_{H-30/H-31}$  (this coupling is not over a double bond, so this should not be 15.0 Hz). For this reason, the  $\Delta^{29,30}$  double bond configuration was revised as *E* configuration. Thus the structure of HTM was determined as depicted in Figure 1.

## SUPPORTING INFORMATION

**Table S3.**  $^{13}\text{C}$  (150 MHz) and  $^1\text{H}$  (600 MHz) NMR data for HTM (1).

| Position            | $\delta_{\text{H}}$ multi.(J in Hz)       | $\delta_{\text{C}}$ | HMBC                  | $^1\text{H}$ - $^1\text{H}$ COSY |
|---------------------|-------------------------------------------|---------------------|-----------------------|----------------------------------|
| 1                   | 10.94, brs                                |                     | C-2,3,8,9             | H-2                              |
| 2                   | 6.94, d (2.4)                             | 125.7               | C-8,9                 | H-1                              |
| 3                   |                                           | 107.3               |                       |                                  |
| 4                   | 7.32, d (8.4)                             | 118.0               | C-6,8                 | H-5                              |
| 5                   | 6.92, t (7.2)                             | 118.7               | C-7,9                 | H-4                              |
| 6                   | 7.02, t (7.2)                             | 121.1               | C-4,8                 | H-7                              |
| 7                   | 7.29, d (8.4)                             | 111.2               | C-5,9                 | H-6                              |
| 8                   |                                           | 136.2               |                       |                                  |
| 9                   |                                           | 127.0               |                       |                                  |
| 10                  | 3.24, dd (14.4, 4.8); 3.34 dd (14.4, 4.2) | 26.4                | C-11,3,16,9           | H-11                             |
| 11                  | 4.7, dd (4.8, 4.2)                        | 64.7                | C-3,10,13,16          | H-10                             |
| 12N-CH <sub>3</sub> | 2.94, s                                   | 31.4                | C-11,13               |                                  |
| 13                  |                                           | 162.3               |                       |                                  |
| 14                  |                                           | 125.3               |                       |                                  |
| 16                  |                                           | 172.1               |                       |                                  |
| 17                  | 5.52, q (7.2)                             | 129.6               | C-13,14,18            | H-18                             |
| 18                  | 0.60, d (7.2)                             | 13.4                | C-14,17               | H-17                             |
| 19                  |                                           | 167.0               |                       |                                  |
| 20                  | 5.72, dd (8.4, 3.6)                       | 55.8                | C-19,21               | H-21,23                          |
| 21                  | 3.66, m                                   | 75.9                | C-21-OCH <sub>3</sub> | H-20,22                          |
| 21-OCH <sub>3</sub> | 3.18, s                                   | 56.4                | C-21,22               |                                  |
| 22                  | 0.98, d (6.0)                             | 15.5                | C-21,20               | H-21                             |
| 23                  | 8.02, d (8.4)                             |                     | C-20,21               | H-20                             |
| 24                  |                                           | 164.2               |                       |                                  |
| 25                  |                                           | 135.8               |                       |                                  |
| 26                  | 5.49, s                                   | 105.2               | C-24,25               |                                  |
| 27                  | 9.28, s                                   |                     | C-28                  |                                  |
| 28                  |                                           | 164.7               |                       |                                  |
| 29                  | 6.27, d (15.0)                            | 123.1               | C-28,31               | H-30                             |
| 30                  | 7.09, dd (15.0, 10.2)                     | 141.0               | C-28,29,31,32         | H-29                             |
| 31                  | 6.22, m (overlap)                         | 128.9               | C-29,30,33            | H-29,33                          |
| 32                  | 6.19, dt (15.0, 6.6)                      | 142.3               | C-30,31,33,34         | H-33                             |
| 33                  | 2.17, q (7.2)                             | 31.7                | C-31,32,34,35         | H-32,34                          |
| 34                  | 1.62, m                                   | 25.1                | C-32,33,35            | H-33,35                          |
| 35                  | 2.29, t (7.2)                             | 35.4                | C-33,34,37, 41        | H-34,41                          |
| 36                  |                                           | 163.7               |                       |                                  |
| 37                  | 2.47, m (overlap)                         | 28.6                | C-35,38, 42, 41       | H-38,41                          |
| 38                  | 4.37, m                                   | 77.2                | C-36,37,40,42         | H-37,42                          |
| 40                  |                                           | 161.6               |                       |                                  |
| 41                  | 5.72, s                                   | 114.5               |                       |                                  |
| 42                  | 5.36, dd (13.2, 7.2)                      | 73.4                | C-37,38, 44           | H-38                             |
| 43                  | 8.22, d (8.4)                             |                     | C-44                  |                                  |
| 44                  |                                           | 168.3               |                       |                                  |
| 45                  |                                           | 130.5               |                       |                                  |
| 46                  | 1.83, s                                   | 12.8                | C-44,45,47            | H-47                             |
| 47                  | 6.13, d (9.0)                             | 137.4               | C-46,44,45,49         | H-46,48                          |
| 48                  | 4.64, m                                   | 42.4                | C-45,47,49,51         | H-47,49,50                       |
| 49                  | 1.16, d (6.6)                             | 20.3                | C-47,48               | H-48                             |
| 50                  | 8.14, d (7.2)                             |                     | C-49,51,52            | H-48                             |
| 51                  |                                           | 164.6               |                       |                                  |
| 52                  | 5.57, d (11.4)                            | 119.1               | C-51,53,54            | H-53                             |
| 53                  | 6.35, t (11.4)                            | 140.1               | C-51,54,55            | H-52,54                          |
| 54                  | 7.49, dd (14.4, 12.0)                     | 128.6               | C-53,56               | H-53,55                          |
| 55                  | 5.94, m                                   | 136.9               | C-53,56               | H-54,56                          |
| 56                  | 1.78,d (6.6)                              | 18.3                | C-54,55               | H-55                             |

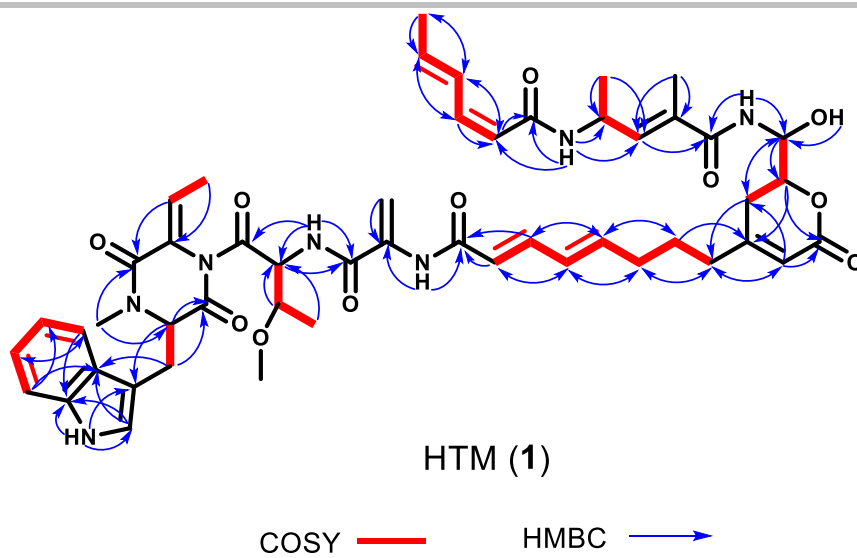

**Figure S2.** Key COSY and HMBC correlation of HTM (1).

## SUPPORTING INFORMATION

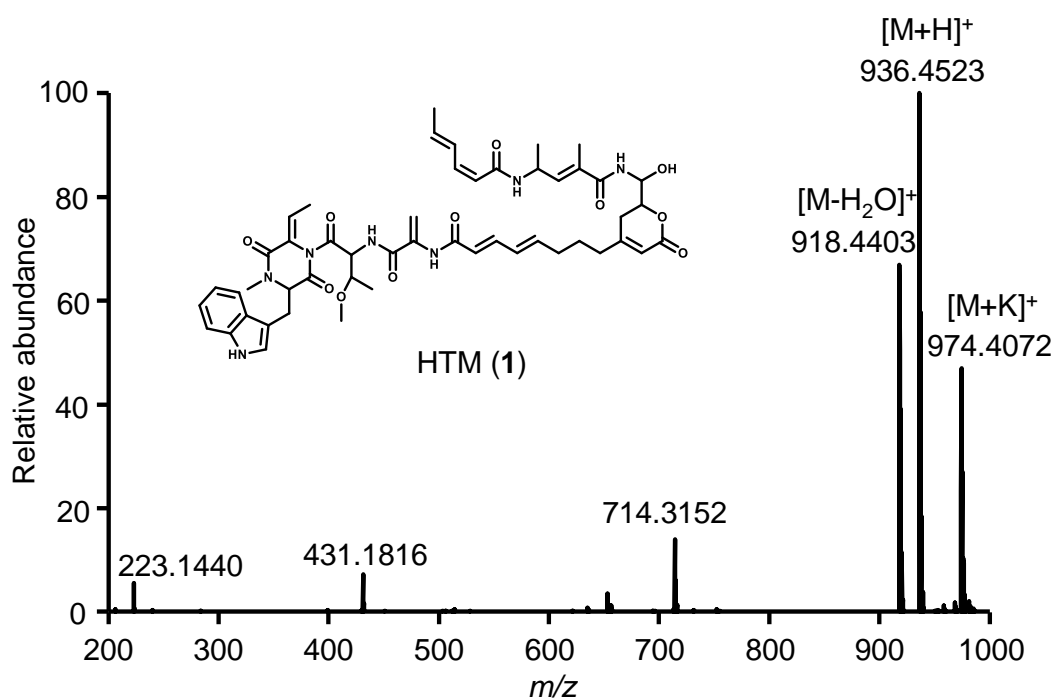

Figure S3. ESI-HRMS spectrum of HTM (1).

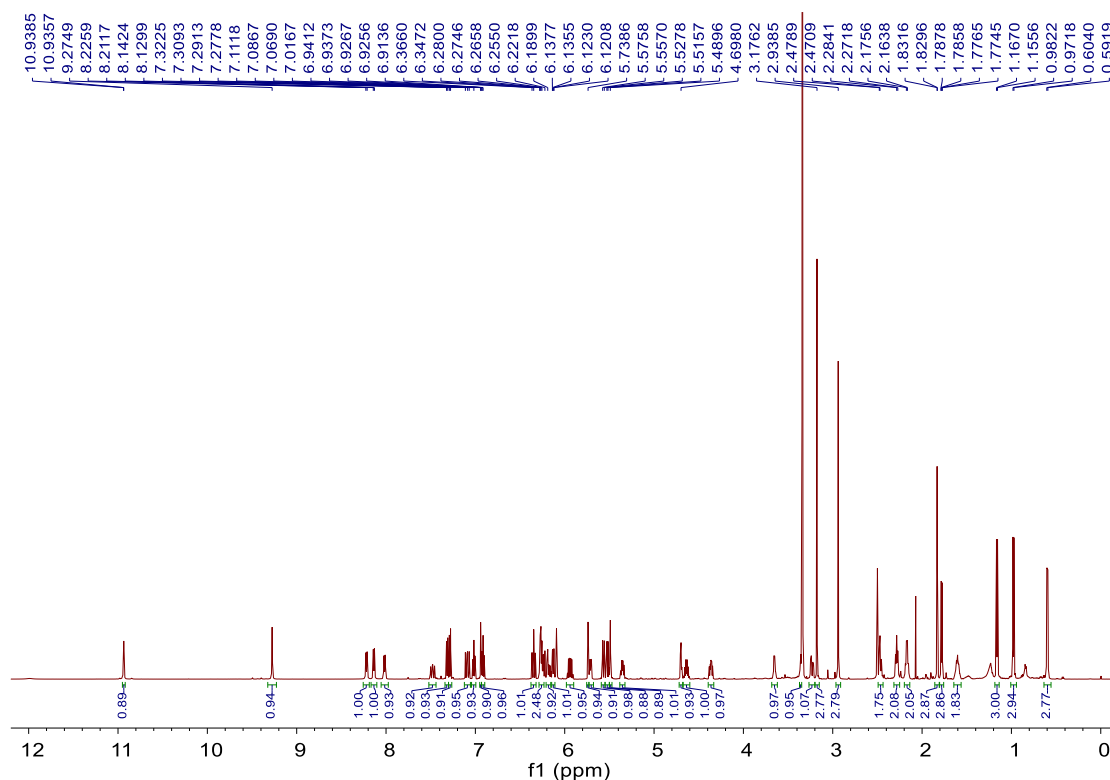

Figure S4.  $^1\text{H}$  NMR spectrum of HTM (1) (600 MHz,  $(\text{CD}_3)_2\text{SO}$ ).

## SUPPORTING INFORMATION

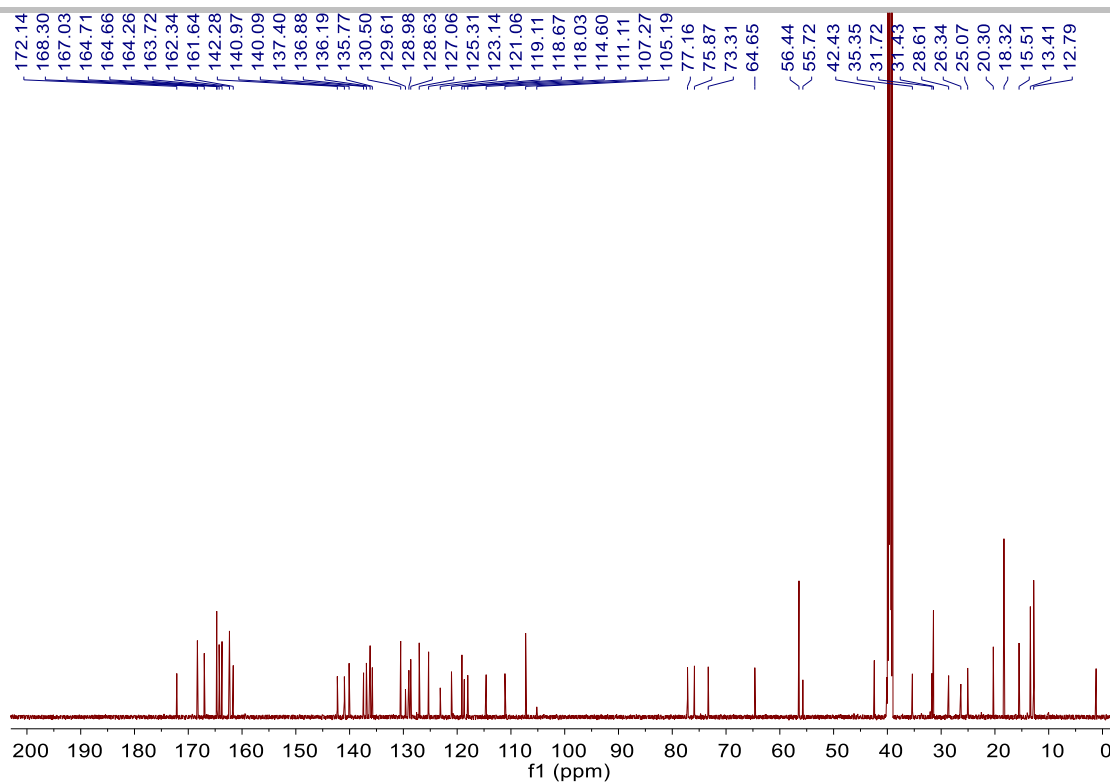

Figure S5. <sup>13</sup>C NMR spectrum of HTM (1) (150 MHz, (CD<sub>3</sub>)<sub>2</sub>SO).

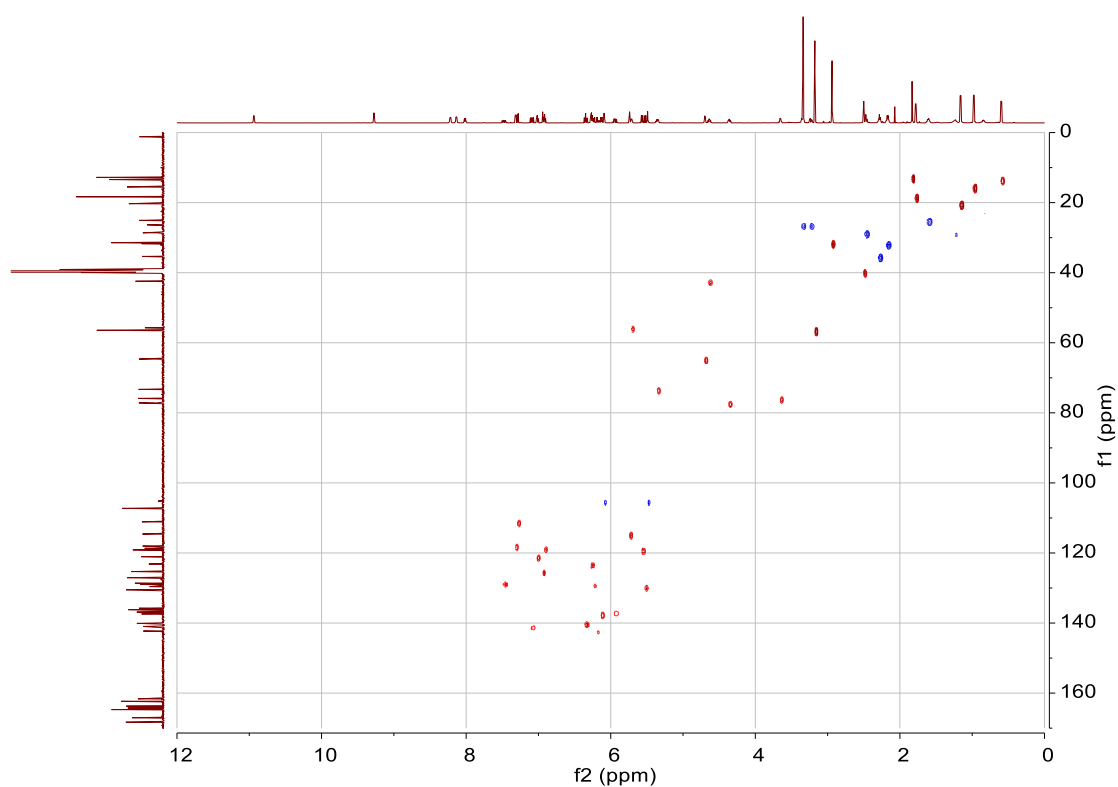

Figure S6. HSQC spectrum of HTM (1) (600 MHz, (CD<sub>3</sub>)<sub>2</sub>SO).

## SUPPORTING INFORMATION

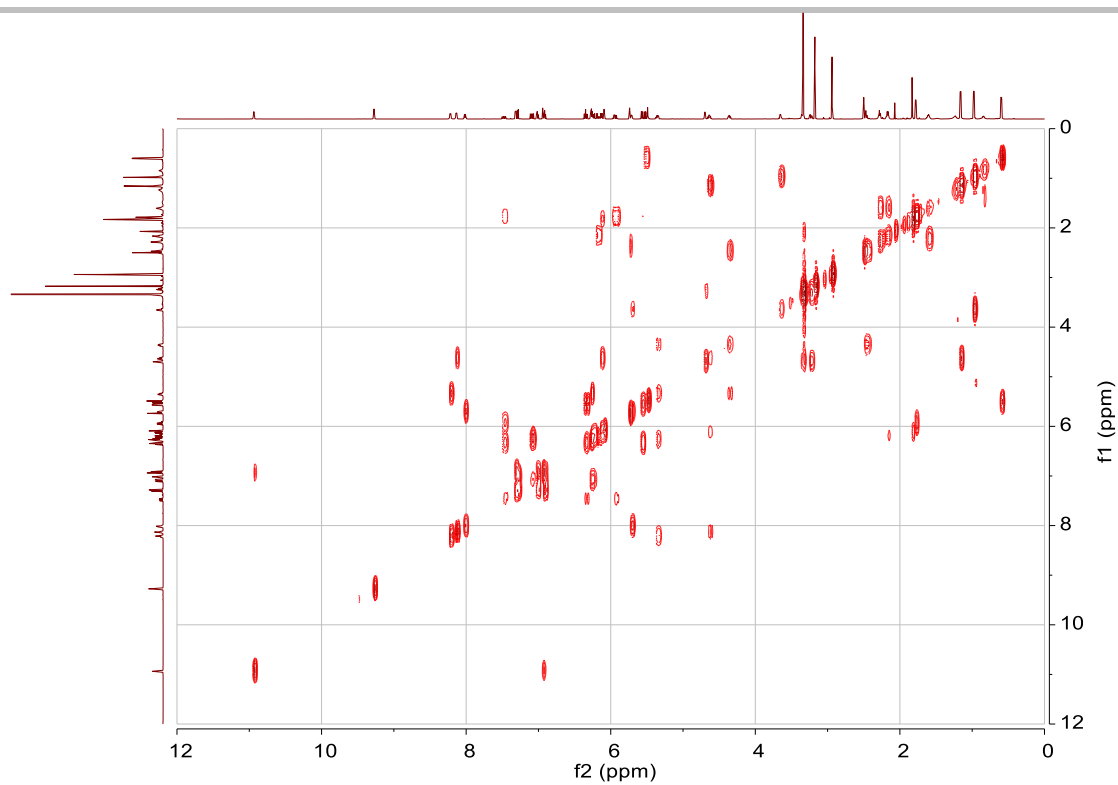

**Figure S7.**  $^1\text{H}$ - $^1\text{H}$  COSY spectrum of HTM (**1**) (600 MHz,  $(\text{CD}_3)_2\text{SO}$ ).

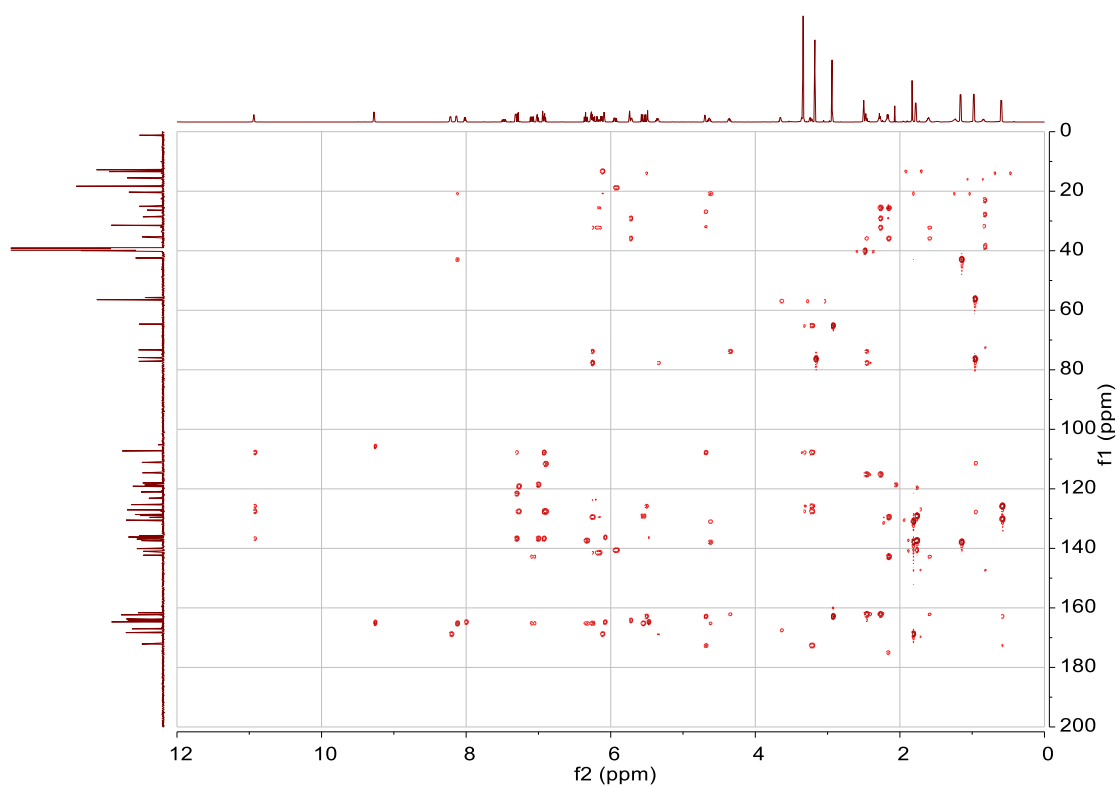

**Figure S8.** HMBC spectrum of HTM (**1**) (600 MHz,  $(\text{CD}_3)_2\text{SO}$ ).

## SUPPORTING INFORMATION

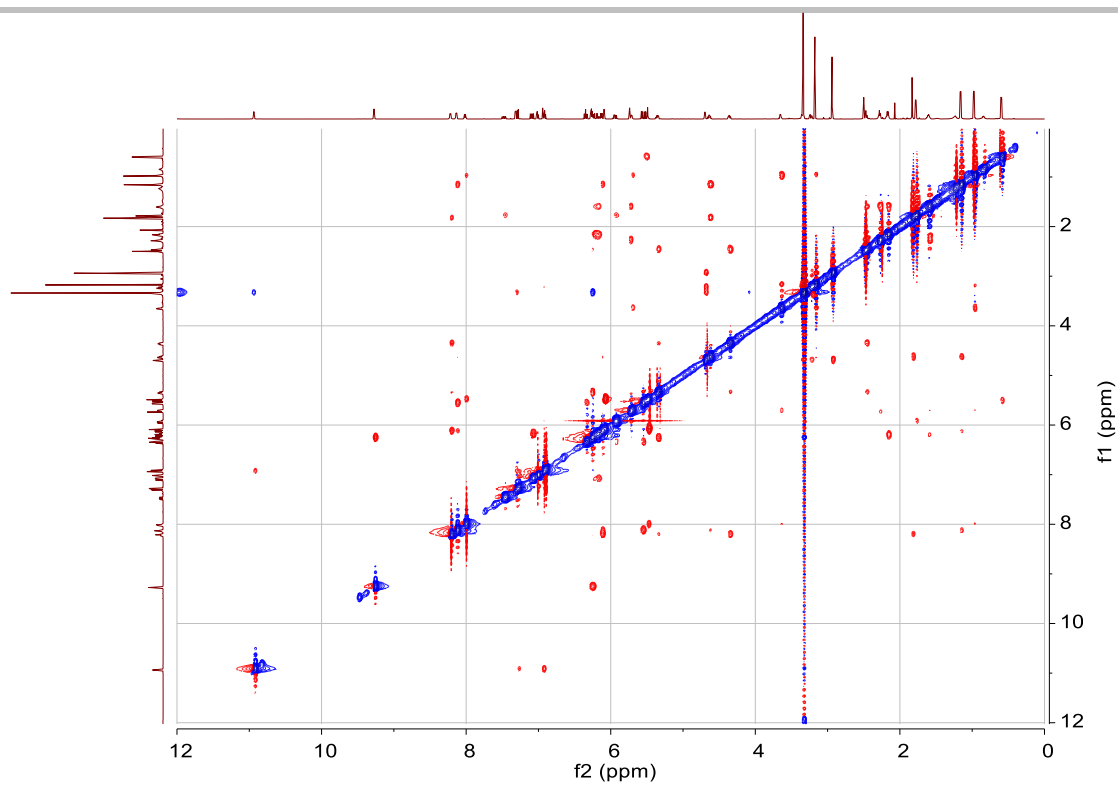

**Figure S9.** ROESY spectrum of HTM (**1**) (600 MHz,  $(\text{CD}_3)_2\text{SO}$ ).

## SUPPORTING INFORMATION

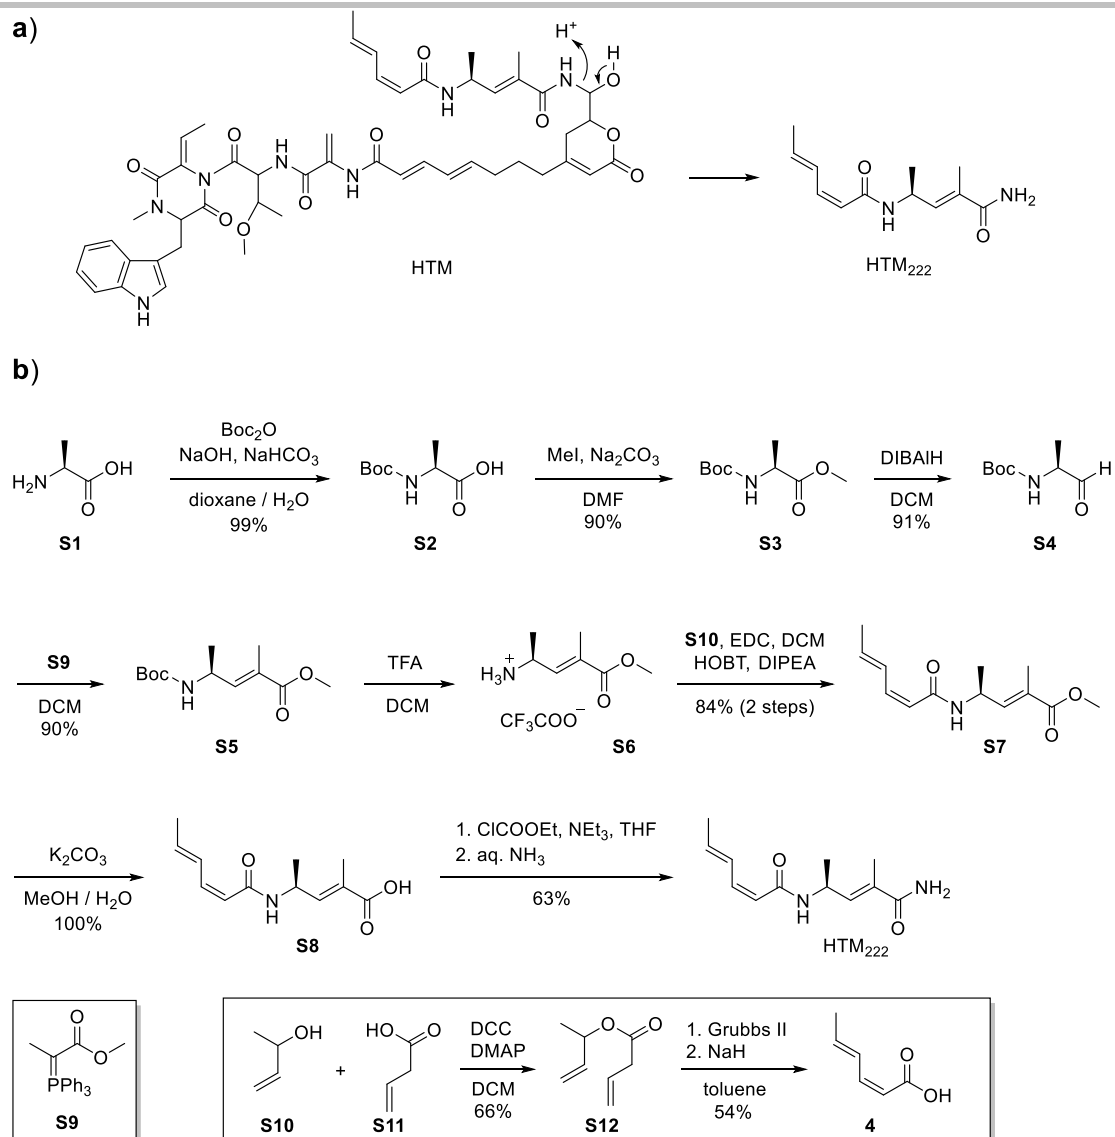

**Scheme S1.** a) Putative degradation of hangtaimycin to sarmentosamide (HTM<sub>222</sub>). b) Synthesis of sarmentosamide.



## SUPPORTING INFORMATION

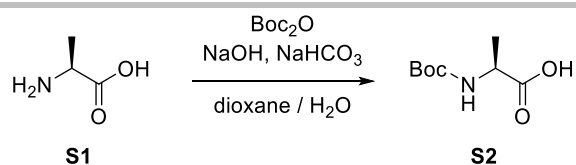

To a solution of dioxane / water (2 : 1, 150 mL) was added L-alanine **S1** (4.45 g, 50.0 mmol), followed by NaOH (aq., 1 M, 50 mL). The reaction mixture was cooled to 0 °C. (Boc)<sub>2</sub>O (16.37 g, 75.0 mmol) and NaHCO<sub>3</sub> (4.20 g, 50.0 mmol) were then added. After being stirred at room temperature for 18 h, the reaction solvent was evaporated to half of the original volume. The residue was diluted with EtOAc (200 mL), followed by cooling to 0 °C and acidification to pH = 2 with HCl (aq., 1 mM). The layers were separated and the aqueous phase was extracted with EtOAc (2 × 100 mL). The combined organic phase was washed with brine, dried over MgSO<sub>4</sub> and then concentrated under reduced pressure to give **S2** as white solid.

**(tert-Butoxycarbonyl)-L-alanine (S2).** Yield: 9.41 g, 49.8 mmol (99%); **Optical rotation:**  $[\alpha]_{\text{D}}^{25} = -21.7$  (c 0.23, MeOH). **HRMS (ESI):** calculated for C<sub>8</sub>H<sub>15</sub>NO<sub>4</sub>Na<sup>+</sup> 212.0893, found 212.0897; **IR** (diamond ATR):  $\tilde{\nu} / \text{cm}^{-1} = 2979$  (m), 2933 (w), 1694 (s), 1511 (m), 1453 (w), 1367 (m), 1158 (s), 1070 (m), 1023 (w), 638 (m); **<sup>1</sup>H-NMR** (500 MHz, CD<sub>3</sub>OD):  $\delta$  (ppm) 4.11 (q, 1H, *J* = 7.2 Hz), 1.44 (s, 9H), 1.35 (d, 3H, *J* = 7.3 Hz); **<sup>13</sup>C-NMR** (126 MHz, CD<sub>3</sub>OD):  $\delta$  (ppm) 176.8, 157.9, 80.4, 50.4, 28.7, 17.9.

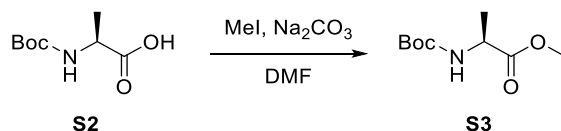

Boc-protected glycine **S2** (5.00 g, 26.5 mmol) was added to DMF (40 mL), followed by Na<sub>2</sub>CO<sub>3</sub> (6.05 g, 57.1 mmol) and methyl iodide (7.00 mL, 112.4 mmol). The solution was stirred at room temperature for 16 h and then diluted with EtOAc (200 mL). The organic layer was washed with water (40 mL) and brine (40 mL), and dried over MgSO<sub>4</sub>. After removal of the solvent under reduced pressure, the residue was purified by column chromatography on silica gel (cyclohexane : EtOAc = 2 : 1) to give **S3** as white solid.

**Methyl (tert-butoxycarbonyl)-L-alaninate (S3).** TLC (cyclohexane : EtOAc = 2 : 1): *R<sub>f</sub>* = 0.52; **Yield:** 4.83 g, 23.8 mmol (90%); **Optical rotation:**  $[\alpha]_{\text{D}}^{20} = -39.3$  (c 0.20, MeOH); **HRMS (ESI):** calculated for C<sub>9</sub>H<sub>17</sub>NO<sub>4</sub>Na<sup>+</sup> 226.1050, found 226.1051; **IR** (diamond ATR):  $\tilde{\nu} / \text{cm}^{-1} = 3365$  (m), 2979 (m), 1744 (m), 1714 (s), 1516 (m), 1454 (w), 1367 (w), 1164 (s), 1069 (m), 981 (w); **<sup>1</sup>H-NMR** (500 MHz, CDCl<sub>3</sub>):  $\delta$  (ppm) 5.09 (s, 1H), 4.27 (q, 1H, *J* = 7.2 Hz), 3.70 (s, 3H), 1.40 (s, 9H), 1.34 (d, 3H, *J* = 7.2 Hz); **<sup>13</sup>C-NMR** (126 MHz, CDCl<sub>3</sub>)  $\delta$  (ppm) 173.92, 155.18, 79.86, 52.35, 49.22, 28.38, 18.68.

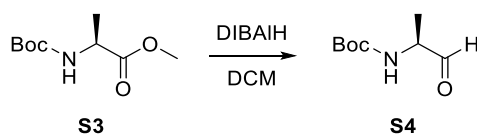

A solution of DIBALH in hexane (1 M, 21.0 mL, 21.0 mmol) was added dropwise to a cooled (−78 °C) solution of **S3** (2.03 g, 10.0 mmol) in CH<sub>2</sub>Cl<sub>2</sub> (20 mL). The reaction mixture was stirred at −78 °C for 2 h and then quenched by the addition of saturated potassium sodium tartrate solution (20 mL). The reaction mixture was warmed to room temperature and extracted with EtOAc (3 × 20 mL). The combined organic layers were dried over MgSO<sub>4</sub> and concentrated under reduced pressure. The residue was purified by column chromatography on silica gel (cyclohexane : EtOAc = 4 : 1) to give **S4** as white solid.

**tert-Butyl (S)-(1-oxopropan-2-yl)carbamate (S4).** TLC (cyclohexane : EtOAc = 2 : 1): *R<sub>f</sub>* = 0.50; **Yield:** 1.57 g, 9.1 mmol (91%); **Optical rotation:**  $[\alpha]_{\text{D}}^{25} = -24.7$  (c 0.22, MeOH); **HRMS (ESI):** calculated for C<sub>8</sub>H<sub>15</sub>NO<sub>3</sub>Na<sup>+</sup> 196.0944, found 196.0947; **IR** (diamond ATR):  $\tilde{\nu} / \text{cm}^{-1} = 3347$  (m), 2979 (m), 2935 (w), 1687 (s), 1509 (s), 1366 (m), 1247 (m), 1163 (s), 1054 (m), 782 (w); **<sup>1</sup>H-NMR** (500 MHz, CDCl<sub>3</sub>):  $\delta$  (ppm) 9.55 (s, 1H), 5.12 (br, 1H), 4.20 (q, 1H, *J* = 7.4 Hz), 1.44 (s, 9H), 1.32 (d, 3H, *J* = 7.5 Hz); **<sup>13</sup>C-NMR** (125 MHz, CDCl<sub>3</sub>)  $\delta$  (ppm) 199.9, 155.4, 80.2, 55.6, 28.4, 15.0.

## SUPPORTING INFORMATION

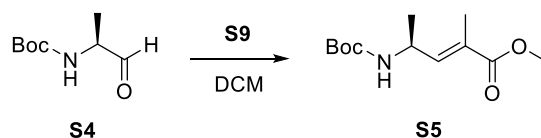

**S4** (0.69 g, 4.0 mmol) dissolved in  $\text{CH}_2\text{Cl}_2$  (6 mL) was added to a solution of **S9** (1.73 g, 4.4 mmol, synthesized as reported<sup>8</sup>) in  $\text{CH}_2\text{Cl}_2$  (8 mL). The solution was stirred at room temperature for 6 h and then concentrated under reduced pressure. The residue was purified by column chromatography on silica gel (cyclohexane : EtOAc = 3 : 1) to give **S5** as white solid.

**Methyl (S,E)-4-((tert-butoxycarbonyl)amino)-2-methylpent-2-enoate (S5)**. TLC (cyclohexane : EtOAc = 1 : 1):  $R_f$  = 0.77; **Yield**: 0.87 g, 3.6 mmol (90%); **Optical rotation**:  $[\alpha]_D^{25} = -9.1$  (c 0.22, MeOH); **HRMS** (ESI): calculated for  $\text{C}_{12}\text{H}_{21}\text{NO}_4\text{Na}^+$  266.1363, found 266.1365; **IR** (diamond ATR):  $\tilde{\nu} / \text{cm}^{-1} = 3359$  (m), 2977 (m), 2932 (w), 1690 (s), 1514 (m), 1366 (m), 1246 (s), 1162 (s), 1047 (m), 749 (m); **<sup>1</sup>H-NMR** (500 MHz,  $\text{CD}_3\text{OD}$ ):  $\delta$  (ppm) 6.58 (m, 1H), 4.47 (br, 1H), 3.77 (s, 3H), 1.93 (s, 3H), 1.46 (s, 3H), 1.22 (d, 3H,  $J = 6.0$  Hz); **<sup>13</sup>C-NMR** (126 MHz,  $\text{CD}_3\text{OD}$ )  $\delta$  (ppm) 170.0, 157.5, 144.9, 128.4, 80.1, 52.4, 28.7, 20.3, 12.6.

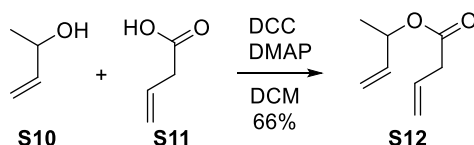

3-Buten-2-ol (**S10**, 3.46 mL, 40 mmol) was dissolved in  $\text{CH}_2\text{Cl}_2$  (100 mL) and cooled to 0 °C. But-3-enoic acid (**S11**, 3.74 mL, 44 mmol), DCC (9.08 g, 44 mmol) and DMAP (0.49 g, 4 mmol) were added to the cooled solution sequentially. The mixture was stirred at room temperature for 5 h and then filtered, followed by washing with  $\text{CH}_2\text{Cl}_2$  (3 × 20 mL). Then the combined organic layers were washed with HCl (aq., 1 M, 20 mL) and saturated  $\text{NaHCO}_3$  solution. After drying over  $\text{MgSO}_4$  and concentration under reduced pressure, distillation (84 – 85 °C, 100 mbar) was conducted to give **S12** as colorless oil.

**But-3-en-2-yl but-3-enoate (S12)**. TLC (cyclohexane : EtOAc = 20 : 1):  $R_f$  = 0.40; **Yield**: 3.67 g, 26.2 mmol (66%); **HRMS** (APCI): calculated for  $\text{C}_8\text{H}_{13}\text{O}_2^+$  141.0910, found 141.0909; **IR** (diamond ATR):  $\tilde{\nu} / \text{cm}^{-1} = 3086$  (w), 2985 (m), 2935 (w), 1733 (s), 1644 (w), 1424 (w), 1252 (m), 1172 (s), 1047 (m), 991 (m), 920 (s); **<sup>1</sup>H-NMR** (700 MHz,  $\text{CDCl}_3$ ):  $\delta$  (ppm) 5.92 (ddt, 1H,  $J = 16.5, 10.8, 6.9$  Hz), 5.83 (ddd, 1H,  $J = 17.4, 10.6, 5.9$  Hz), 5.36 (m, 1H), 5.23 (dt, 1H,  $J = 17.2, 1.4$  Hz), 5.17 (dq, 1H,  $J = 6.8, 1.5$  Hz), 5.15 (t, 1H,  $J = 1.5$  Hz), 5.13 (dt, 1H,  $J = 10.6, 1.3$  Hz), 3.08 (dt, 2H,  $J = 7.0, 1.5$  Hz), 1.31 (3H, d,  $J = 6.6$  Hz); **<sup>13</sup>C-NMR** (176 MHz,  $\text{CDCl}_3$ )  $\delta$  (ppm) 170.8, 137.7, 130.5, 118.6, 116.0, 71.3, 39.5, 20.0.

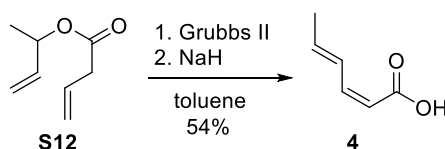

To a solution of **S12** (1.12 g, 8.0 mmol) dissolved in toluene (60 mL) was added Grubbs II catalyst (67.9 mg, 0.08 mmol) at 65 °C. NaH (60 wt.-% in mineral oil, 0.48 g, 12.0 mmol) was added after 1.5 h. The solution was stirred for another 3 h at the same temperature and then cooled to room temperature. The reaction was quenched by adding water (30 mL) and HCl (aq., 1 M, 10 mL). After extraction of the mixture with diethyl ether (3 × 40 mL), the organic layer was dried over  $\text{MgSO}_4$  and concentrated under reduced pressure. The residue was purified by column chromatography on silica gel (cyclohexane : diethyl ether = 3 : 1) to give **4** as colorless oil.

**(2Z,4E)-Hexa-2,4-dienoic acid (S13)**. TLC (cyclohexane : diethyl ether = 2 : 1):  $R_f$  = 0.35; **Yield**: 0.48 g, 4.3 mmol (54%); **HRMS** (APCI): calculated for  $\text{C}_6\text{H}_9\text{O}_2^+$  113.0597, found 113.0596; **IR** (diamond ATR):  $\tilde{\nu} / \text{cm}^{-1} = 3057$  (w), 2855 (w), 1684 (s), 1637 (m), 1602

## SUPPORTING INFORMATION

(m), 1435 (m), 1250 (m), 1227 (m), 962 (w), 840 (w);  $^1\text{H-NMR}$  (700 MHz,  $\text{CDCl}_3$ ):  $\delta$  (ppm) 7.36 (m, 1H), 6.65 (t, 1H,  $J = 11.5$  Hz), 6.15 (m, 1H), 5.58 (dq, 1H,  $J = 11.4, 0.9$  Hz), 1.90 (dd, 3H,  $J = 6.9, 1.7$  Hz);  $^{13}\text{C-NMR}$  (176 MHz,  $\text{CDCl}_3$ )  $\delta$  (ppm) 172.3, 147.7, 141.9, 128.6, 114.7, 18.9.

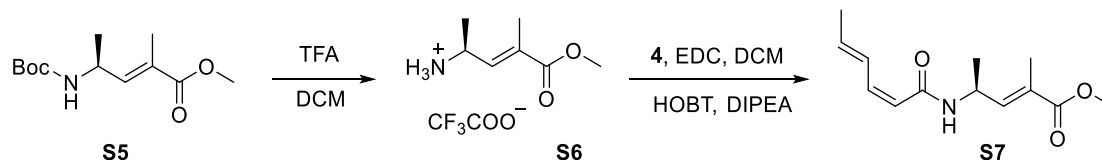

To a solution of TFA /  $\text{CH}_2\text{Cl}_2$  (2 : 3, 2.5 mL) was added **S5** (106.9 mg, 0.44 mmol). The reaction was stirred at room temperature for 30 min and then concentrated under reduced pressure to give **S6** as white solid which was used directly in the next step.

To a solution of **S6** and **4** (49.3 mg, 0.44 mmol) in  $\text{CH}_2\text{Cl}_2$  (5 mL) was added HOBT (70.7 mg, 0.44 mmol) and *N,N*-diisopropylethylamine (76.6  $\mu\text{L}$ , 0.44 mmol). EDC was added sequentially at 0 °C. The mixture was stirred at 0 °C for 30 min followed by room temperature overnight. Then the solution was diluted with EtOAc (50 mL) and washed with saturated  $\text{NH}_4\text{Cl}$  solution (10 mL),  $\text{NaHCO}_3$  solution (10 mL), water (10 mL) and brine (10 mL). After drying over  $\text{MgSO}_4$  and concentration under reduced pressure, the residue was purified by column chromatography on silica gel (cyclohexane : EtOAc = 3 : 1). Amide **S7** was obtained as colorless oil.

**Methyl (S,E)-4-((2Z,4E)-hexa-2,4-dienamido)-2-methylpent-2-enoate (S7)**. TLC (cyclohexane : EtOAc = 1 : 1):  $R_f = 0.50$ ; **Yield**: 88.1 mg, 0.37 mmol (84%) (2 steps); **Optical rotation**:  $[\alpha]_D^{25} = -193.1$  (c 0.14, MeOH); **HRMS** (ESI): calculated for  $\text{C}_{13}\text{H}_{20}\text{NO}_3^+$  238.1438, found 238.1442; **IR** (diamond ATR):  $\tilde{\nu} / \text{cm}^{-1} = 3289$  (m), 2977 (m), 1717 (s), 1651 (s), 1532 (s), 1437 (m), 1256 (s), 1145 (m), 1084 (m), 749 (m);  $^1\text{H-NMR}$  (500 MHz,  $\text{CD}_3\text{OD}$ ):  $\delta$  (ppm) 7.41 (m, 1H), 6.59 (dq, 1H,  $J = 9.0, 1.5$  Hz), 6.43 (t, 1H,  $J = 11.3$  Hz), 6.03 (dq, 1H,  $J = 15.1, 6.9, 0.9$  Hz), 5.58 (dq, 1H,  $J = 11.4, 0.8$  Hz), 4.81 (dq, 1H,  $J = 9.0, 6.8$  Hz), 3.76 (s, 3H), 1.95 (d, 3H,  $J = 1.5$  Hz), 1.86 (dd, 3H,  $J = 6.9, 1.7$  Hz), 1.27 (d, 3H,  $J = 6.9$  Hz);  $^{13}\text{C-NMR}$  (126 MHz,  $\text{CD}_3\text{OD}$ )  $\delta$  (ppm) 169.9, 168.2, 143.9, 142.7, 139.0, 129.7, 129.2, 119.0, 52.4, 44.4, 20.2, 18.6, 12.8.

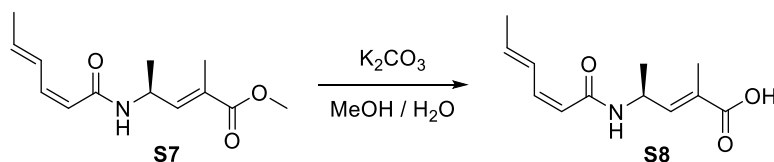

$\text{K}_2\text{CO}_3$  (215.6 mg, 1.56 mmol) was added to a solution of **S7** (74.0 mg, 0.31 mmol) in MeOH /  $\text{H}_2\text{O}$  (1 : 2, 3 mL). The reaction mixture was stirred at 40 °C for 4 h until **S7** was consumed completely. After the treatment with HCl solution (1 M) dropwise until pH = 2 was reached, an excess of acetone was added to precipitate the salt and filtration was conducted. The filtrate was evaporated under reduced pressure to give **S8** as white solid.

**(S,E)-4-((2Z,4E)-hexa-2,4-dienamido)-2-methylpent-2-enoic acid (S8)**. TLC (cyclohexane : EtOAc = 1 : 1):  $R_f = 0.42$ ; **Yield**: 67.1 mg, 0.30 mmol (100%); **Optical rotation**:  $[\alpha]_D^{25} = -129.3$  (c 0.40, MeOH); **HRMS** (ESI): calculated for  $\text{C}_{12}\text{H}_{18}\text{NO}_3^+$  224.1281, found 224.1284; **IR** (diamond ATR):  $\tilde{\nu} / \text{cm}^{-1} = 3271$  (m), 2976 (m), 2931 (m), 1691 (s), 1649 (s), 1535 (s), 1252 (s), 1233 (s), 1157 (m), 999 (w);  $^1\text{H-NMR}$  (500 MHz,  $\text{CD}_3\text{OD}$ ):  $\delta$  (ppm) 7.41 (dddt, 1H,  $J = 15.6, 11.2, 3.0, 1.6$  Hz), 6.61 (dq, 1H,  $J = 9.0, 1.5$  Hz), 6.42 (t, 1H,  $J = 11.3$  Hz), 6.02 (m, 1H), 5.59 (dt, 1H,  $J = 11.6, 1.0$  Hz), 4.82 (dq, 1H,  $J = 8.9, 6.9$  Hz), 1.93 (d, 3H,  $J = 1.5$  Hz), 1.86 (dd, 3H,  $J = 6.8, 1.7$  Hz), 1.27 (d, 3H,  $J = 6.8$  Hz);  $^{13}\text{C-NMR}$  (126 MHz,  $\text{CDCl}_3$ )  $\delta$  (ppm) 171.3, 168.2, 143.7, 142.6, 138.9, 129.7, 129.6, 119.1, 44.5, 20.3, 18.6, 12.7.

## SUPPORTING INFORMATION

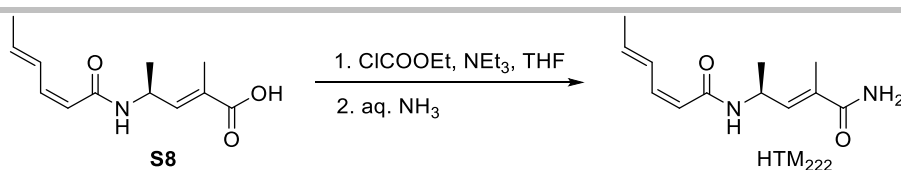

Triethylamine (45.2  $\mu\text{L}$ , 0.32 mmol) and ethyl chloroformate (28.4  $\mu\text{L}$ , 0.30 mmol) were added to a solution of **S8** (60.0 mg, 0.27 mmol) dissolved in THF (1 mL) at 0 °C. The reaction mixture was stirred at 0 °C for 30 min and then aq.  $\text{NH}_3$  (25%, 0.1 mL, 1.1 mmol) was added at the same temperature. After 15 min, the reaction mixture was diluted with  $\text{H}_2\text{O}$  (10 mL) and extracted with  $\text{CH}_2\text{Cl}_2$  (3  $\times$  10 mL). The combined organic phases were dried over  $\text{MgSO}_4$  and then concentrated under reduced pressure. The residue was purified by column chromatography on silica gel (EtOAc) to give sarmentosamide (HTM<sub>222</sub>) as white solid.

**(2Z,4E)-N-((S,E)-5-Amino-4-methyl-5-oxopent-3-en-2-yl)hexa-2,4-dienamide (sarmentosamide, HTM<sub>222</sub>).** TLC (EtOAc):  $R_f = 0.13$ ; **Yield:** 38.0 mg, 0.17 mmol (63%); **Optical rotation:**  $[\alpha]_D^{25} = -194.0$  ( $c$  0.28, MeOH); **HRMS** (ESI): calculated for  $\text{C}_{12}\text{H}_{19}\text{N}_2\text{O}_2^+$  223.1441, found 223.1445; **IR** (diamond ATR):  $\tilde{\nu} / \text{cm}^{-1} = 3287$  (s), 2927 (m), 2854 (w), 1645 (s), 1601 (s), 1533 (s), 1377 (m), 1228 (m), 998 (w), 835 (w); **<sup>1</sup>H-NMR** (700 MHz,  $\text{CD}_3\text{OD}$ ):  $\delta$  (ppm) 7.42 (dddt, 1H,  $J = 14.6, 11.2, 2.7, 1.6$  Hz), 6.43 (1H, t,  $J = 11.4$  Hz), 6.26 (dq, 1H,  $J = 8.8, 1.4$  Hz, 1H), 6.03 (1H, dqt,  $J = 15.2, 6.8, 0.8$  Hz), 5.59 (dq, 1H,  $J = 11.4, 0.8$  Hz), 4.81 (dq, 1H,  $J = 8.7, 6.8$  Hz), 1.96 (d, 3H,  $J = 1.5$  Hz), 1.86 (dd, 3H,  $J = 6.8, 1.4$  Hz), 1.28 (d, 3H,  $J = 6.8$  Hz); **<sup>13</sup>C-NMR** (176 MHz,  $\text{CD}_3\text{OD}$ )  $\delta$  (ppm) 174.2, 168.2, 142.6, 139.0, 138.9, 132.3, 129.8, 119.1, 44.3, 20.5, 18.6, 13.2.

## SUPPORTING INFORMATION

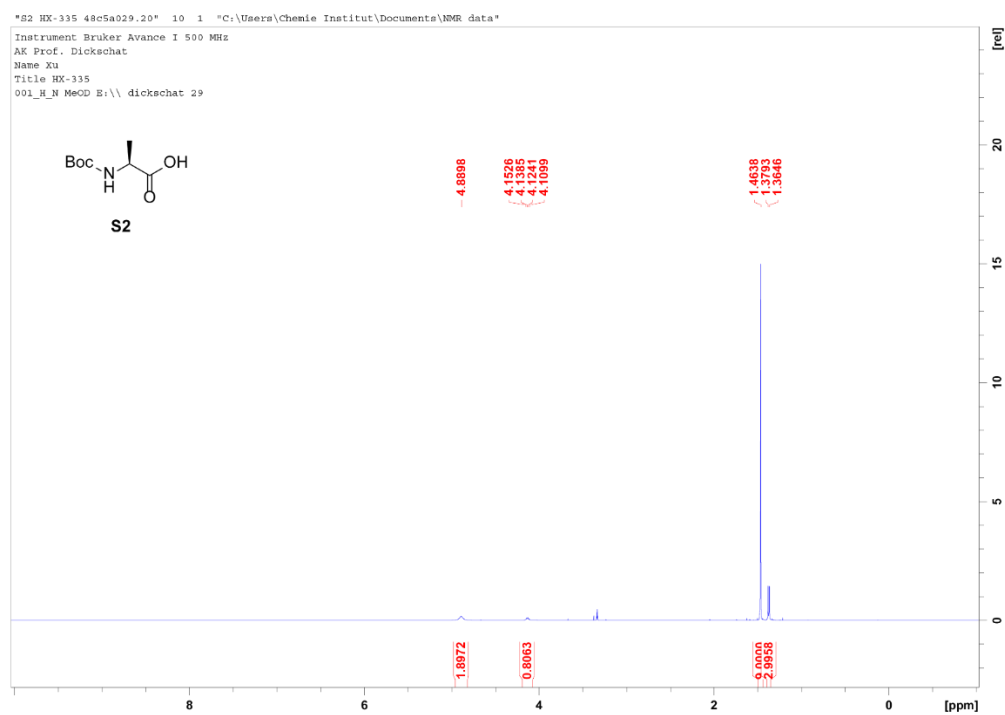

Figure S10.  $^1\text{H}$  NMR spectrum (500 MHz,  $\text{CD}_3\text{OD}$ ) of **S2**.

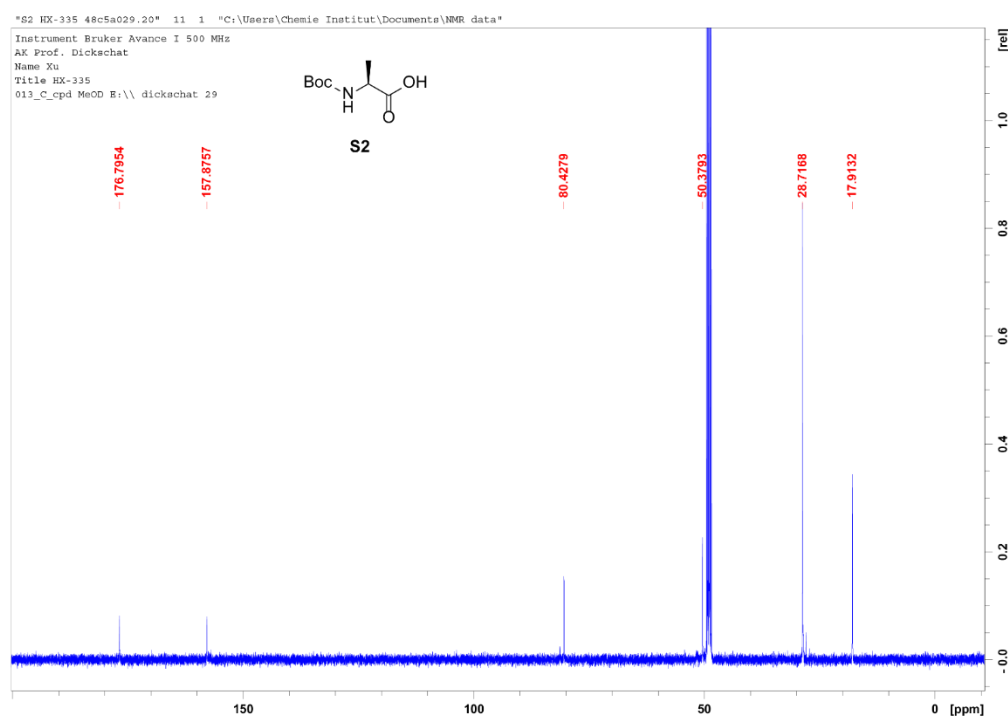

Figure S11.  $^{13}\text{C}$  NMR spectrum (126 MHz,  $\text{CD}_3\text{OD}$ ) of **S2**.

## SUPPORTING INFORMATION

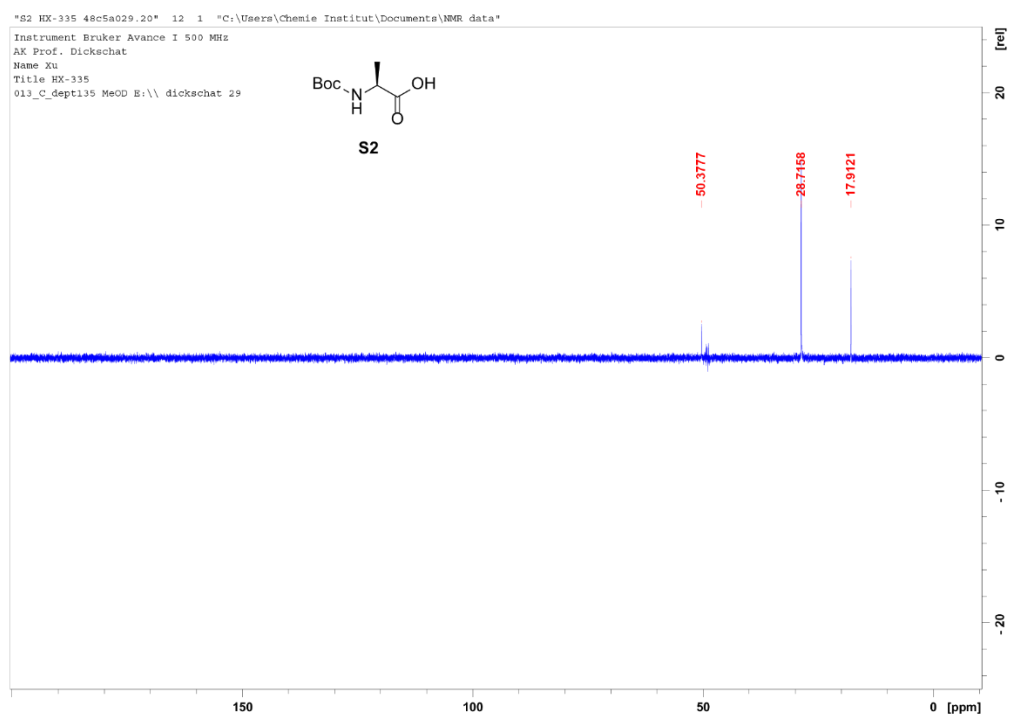

Figure S12.  $^{13}\text{C}$ -DEPT-135 NMR spectrum (126 MHz,  $\text{CD}_3\text{OD}$ ) of **S2**.

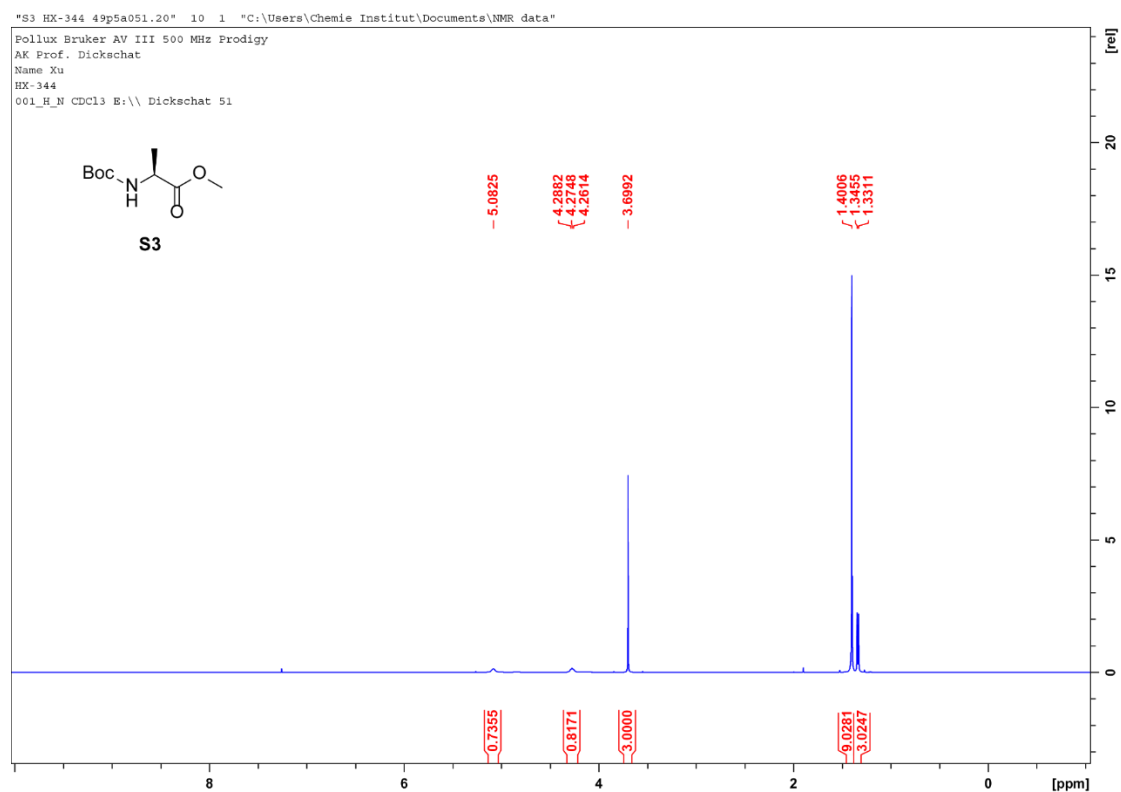

Figure S13.  $^1\text{H}$  NMR spectrum (500 MHz,  $\text{CDCl}_3$ ) of **S3**.

## SUPPORTING INFORMATION

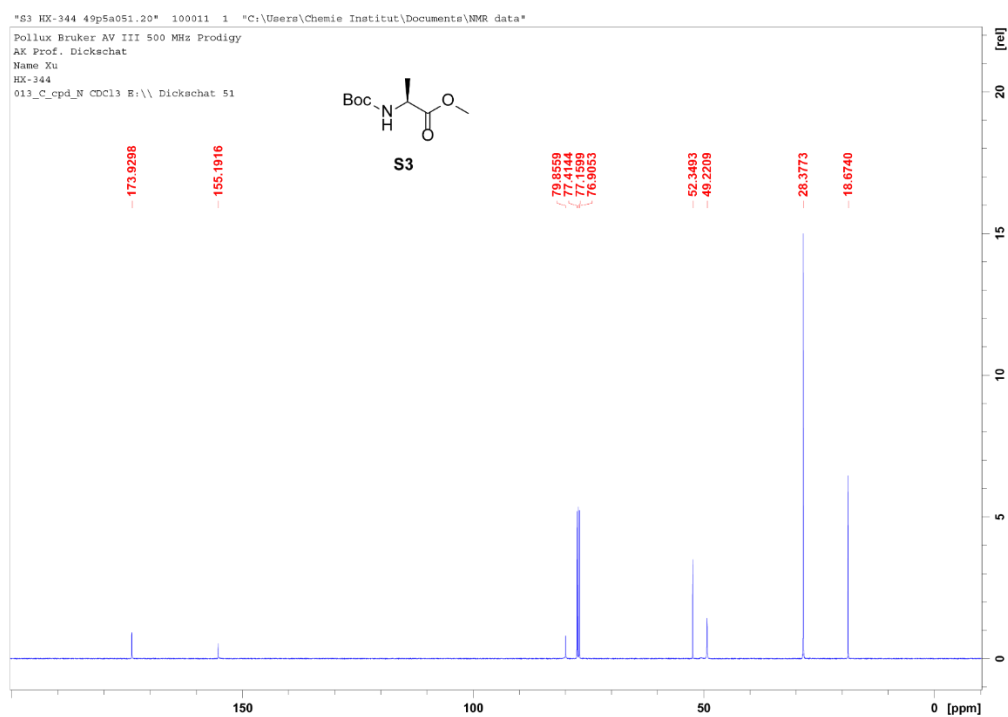

**Figure S14.**  $^{13}\text{C}$  NMR spectrum (126 MHz,  $\text{CDCl}_3$ ) of **S3**.

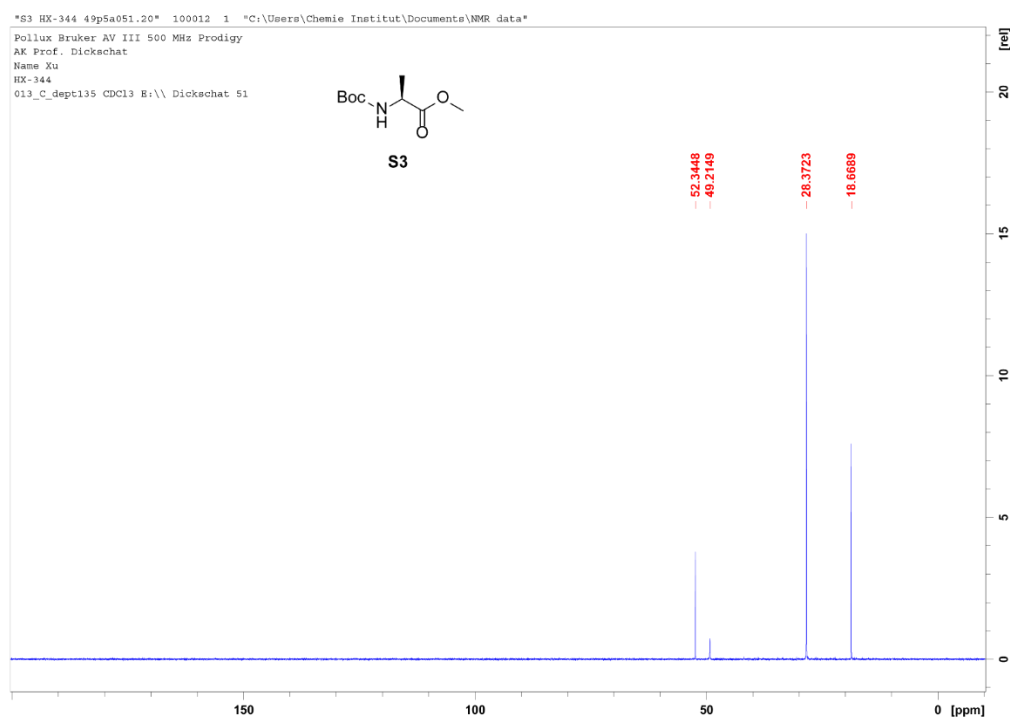

**Figure S15.**  $^{13}\text{C}$ -DEPT-135 NMR spectrum (126 MHz,  $\text{CDCl}_3$ ) of **S3**.

## SUPPORTING INFORMATION

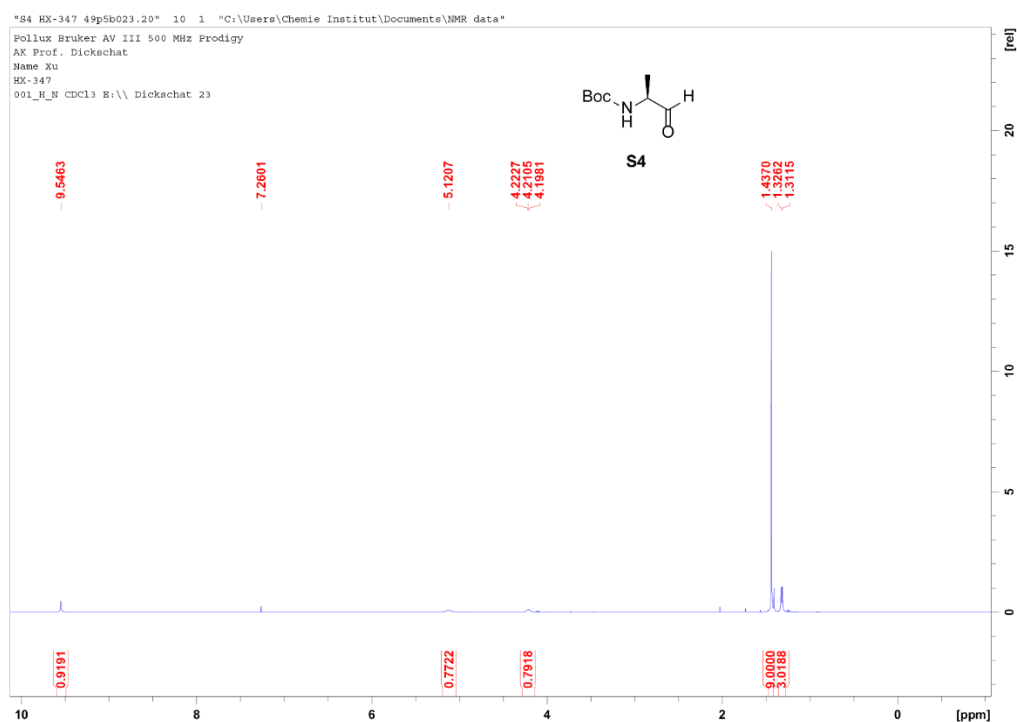

Figure S16.  $^1\text{H}$  NMR spectrum (500 MHz,  $\text{CDCl}_3$ ) of **S4**.

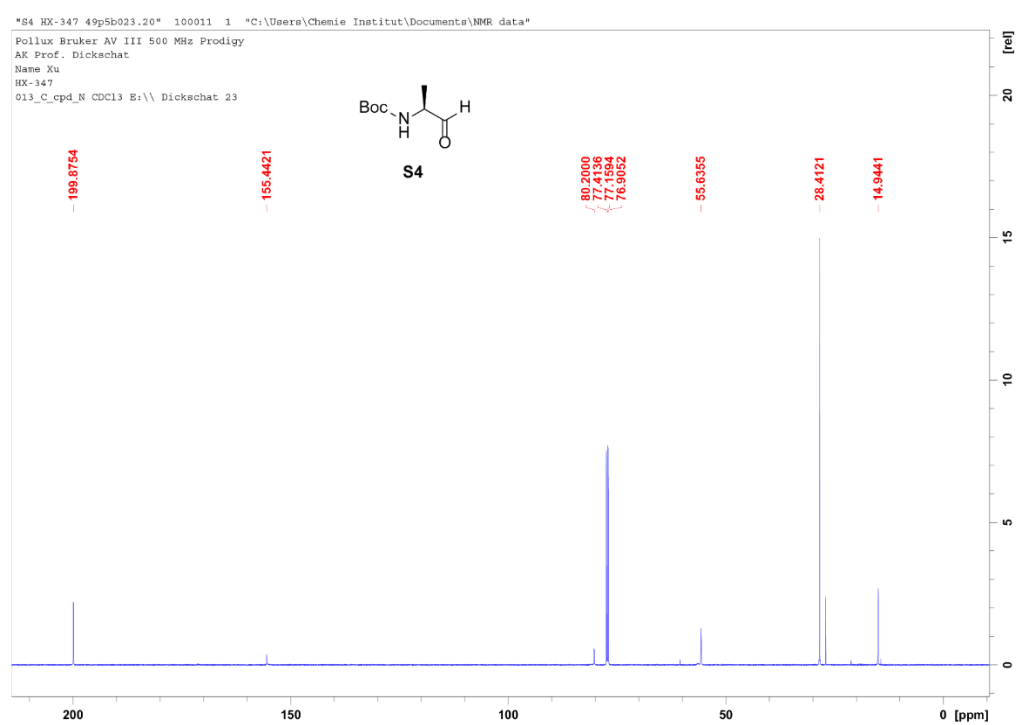

Figure S17.  $^{13}\text{C}$  NMR spectrum (126 MHz,  $\text{CDCl}_3$ ) of **S4**.



## SUPPORTING INFORMATION

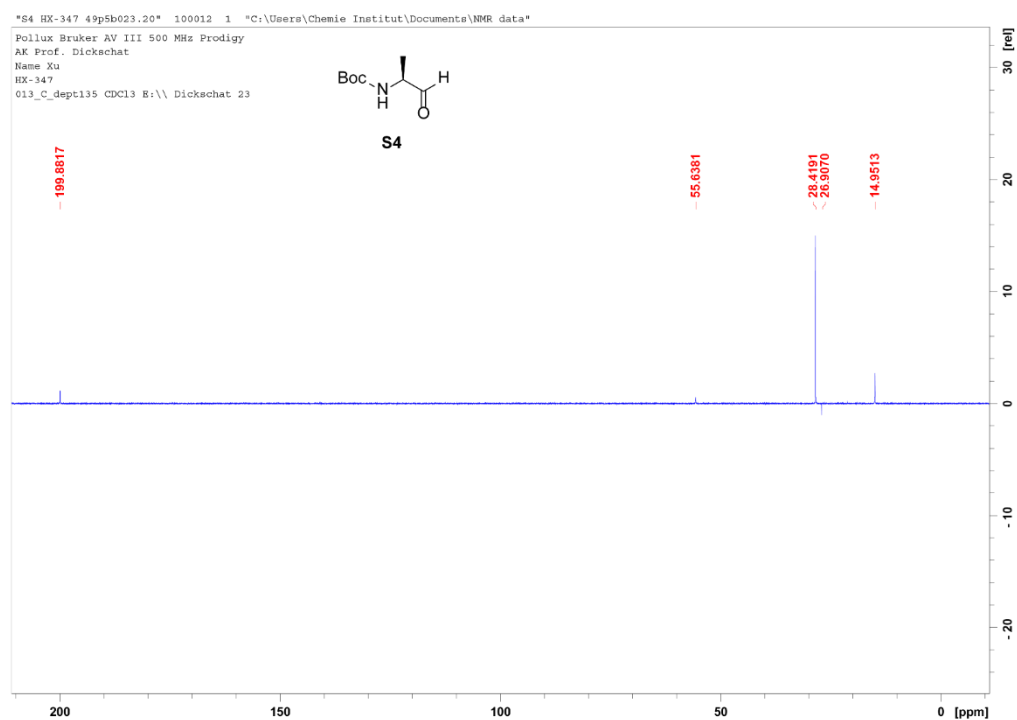

Figure S18.  $^{13}\text{C}$ -DEPT-135 NMR spectrum (126 MHz,  $\text{CDCl}_3$ ) of **S4**.

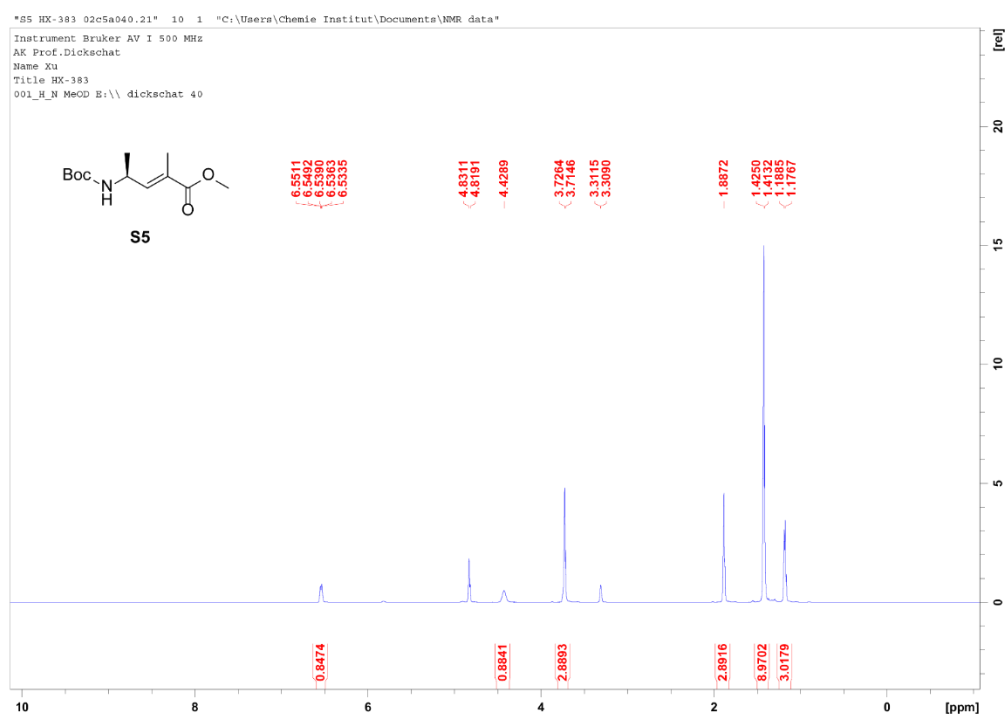

Figure S19.  $^1\text{H}$  NMR spectrum (500 MHz,  $\text{CD}_3\text{OD}$ ) of **S5**.

## SUPPORTING INFORMATION

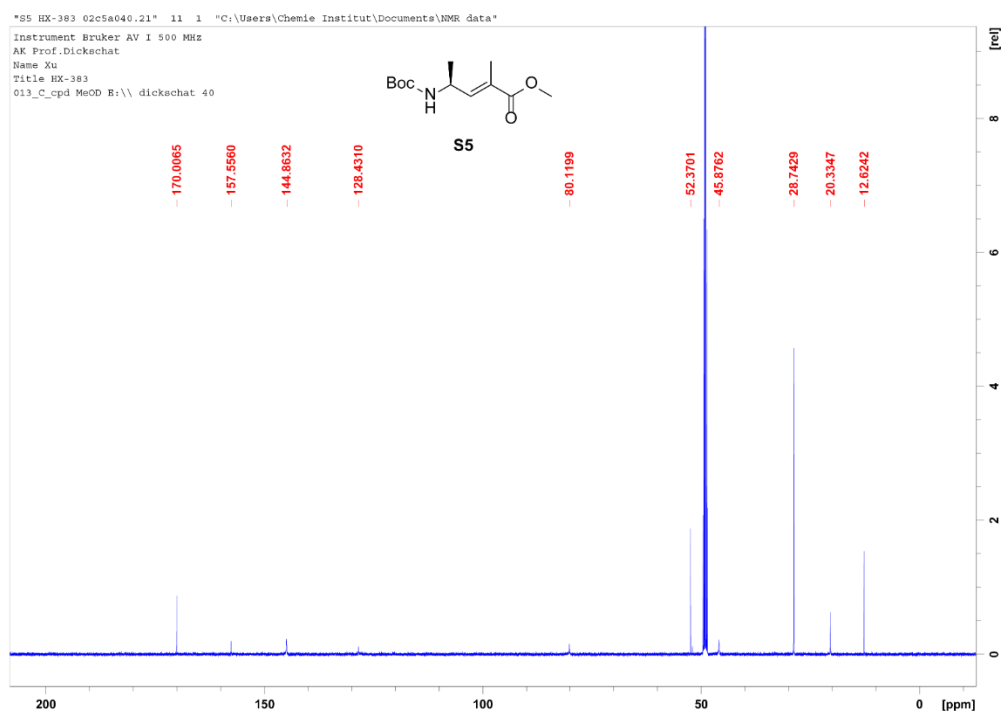

Figure S20.  $^{13}\text{C}$  NMR spectrum (126 MHz,  $\text{CD}_3\text{OD}$ ) of **S5**.

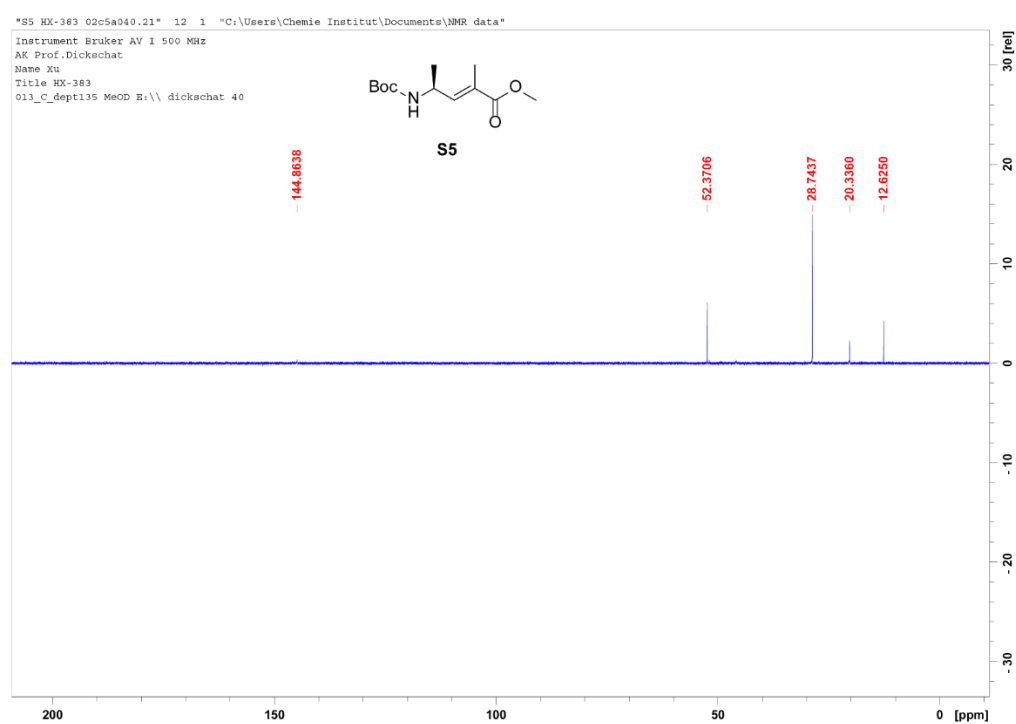

Figure S21.  $^{13}\text{C}$ -DEPT-135 NMR spectrum (126 MHz,  $\text{CD}_3\text{OD}$ ) of **S5**.

## SUPPORTING INFORMATION

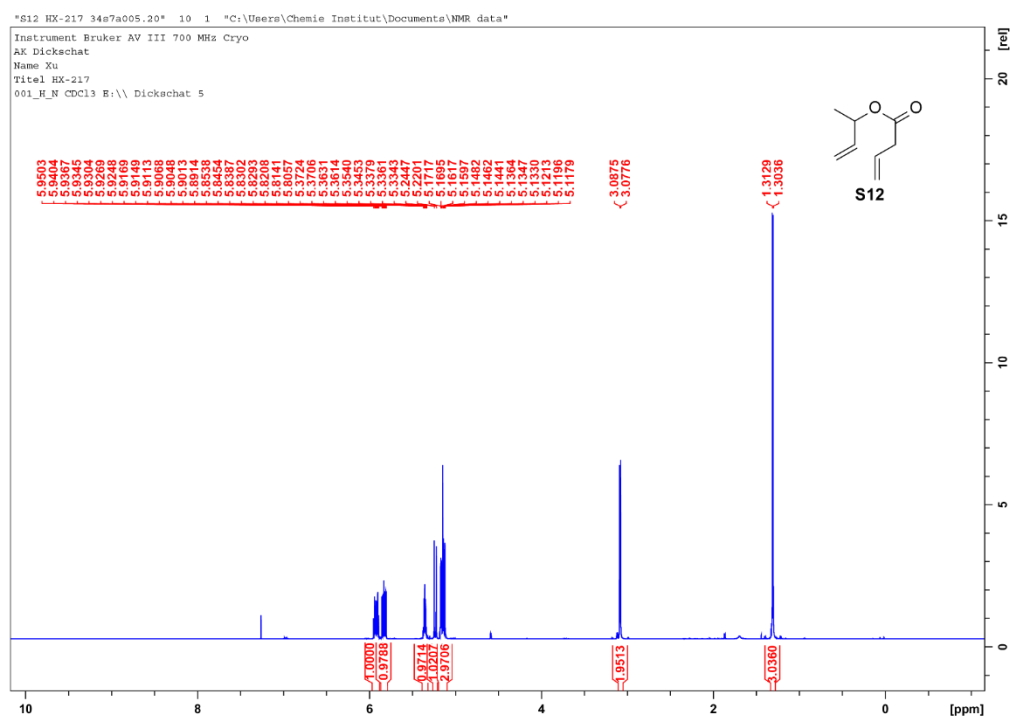Figure S22.  $^1\text{H}$  NMR spectrum (700 MHz,  $\text{CDCl}_3$ ) of S12.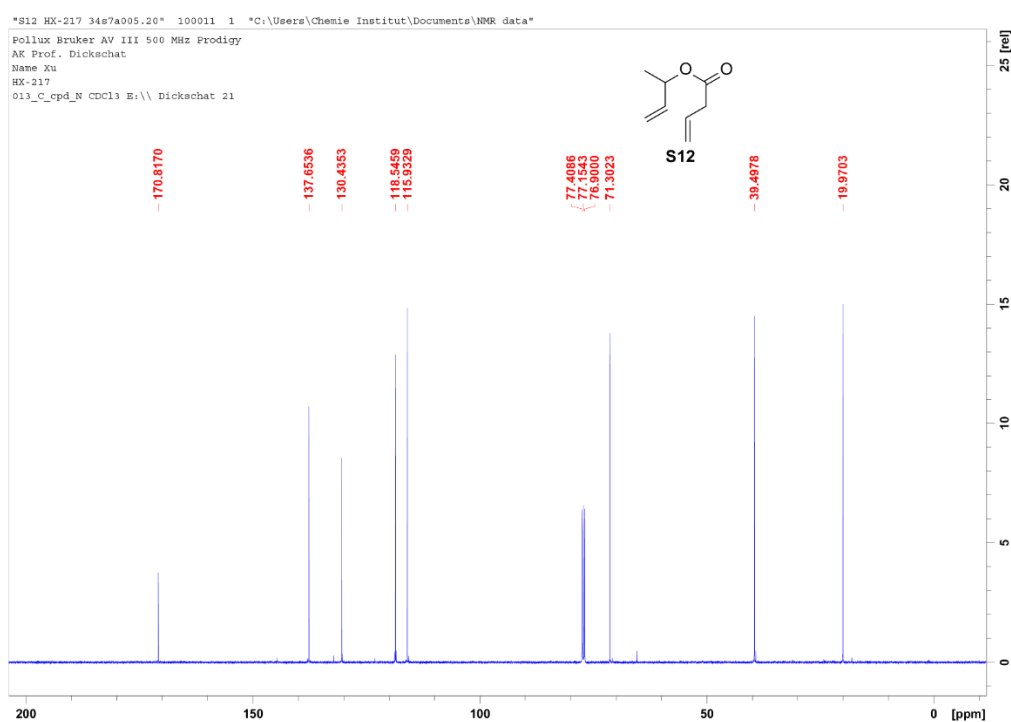Figure S23.  $^{13}\text{C}$  NMR spectrum (176 MHz,  $\text{CDCl}_3$ ) of S12.

## SUPPORTING INFORMATION

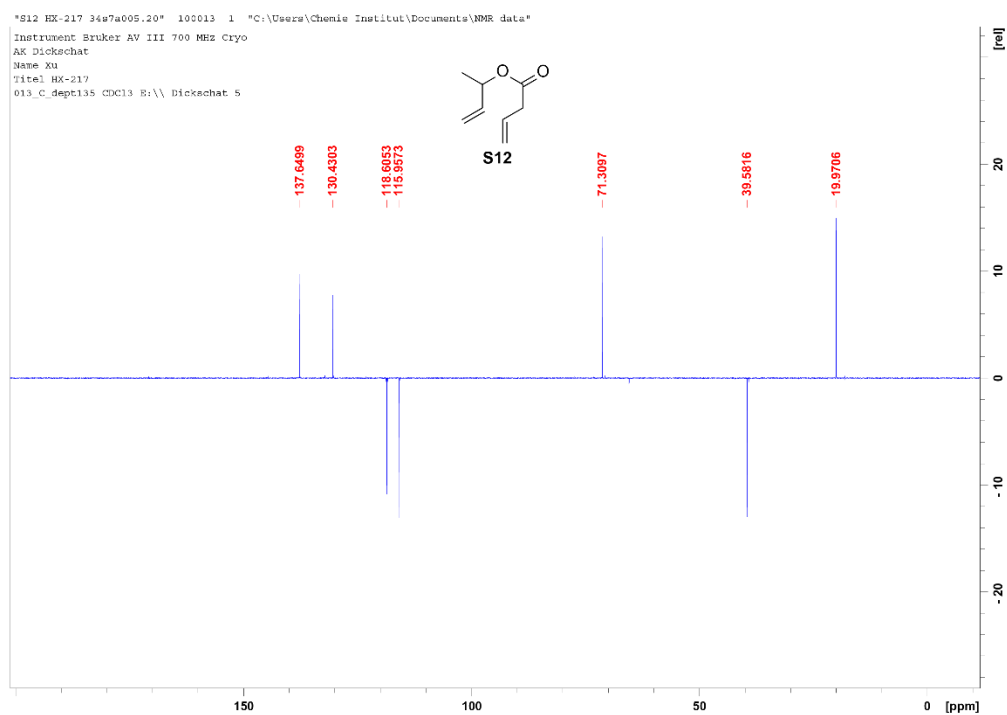

Figure S24.  $^{13}\text{C}$ -DEPT-135 NMR spectrum (176 MHz,  $\text{CDCl}_3$ ) of S12.

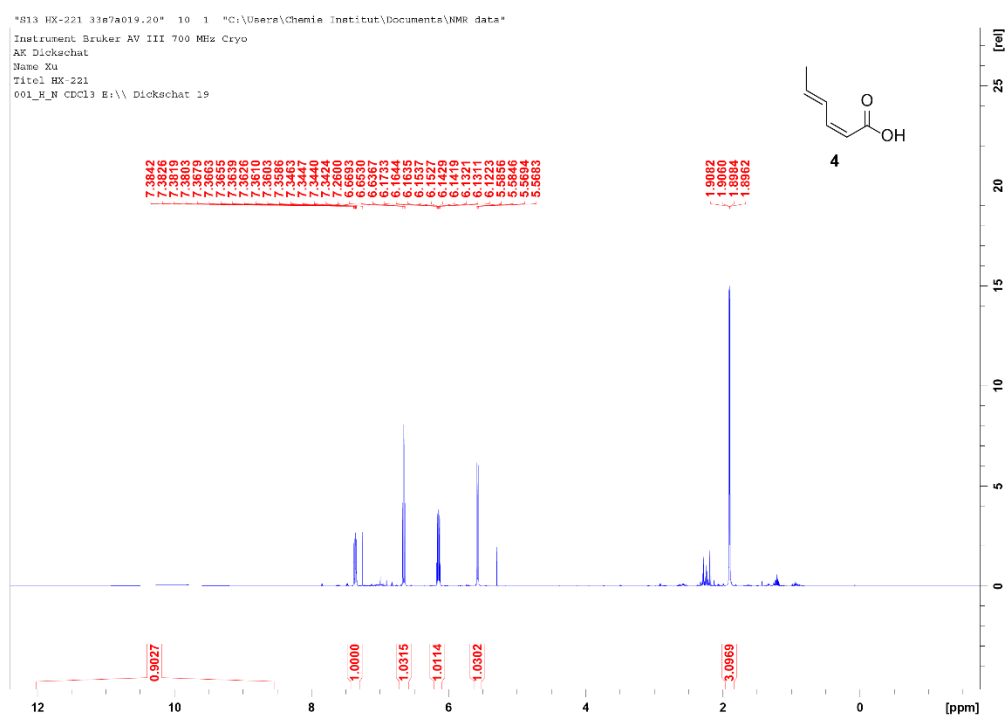

Figure S25.  $^1\text{H}$  NMR spectrum (700 MHz,  $\text{CDCl}_3$ ) of 4.

## SUPPORTING INFORMATION

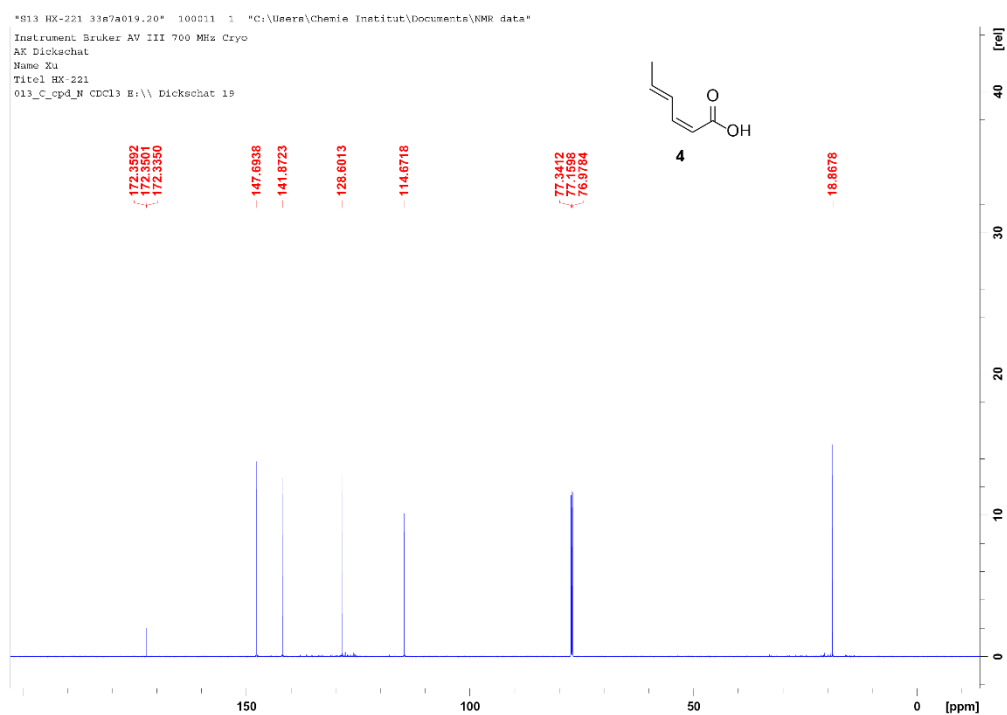

Figure S26.  $^{13}\text{C}$  NMR spectrum (176 MHz,  $\text{CDCl}_3$ ) of 4.

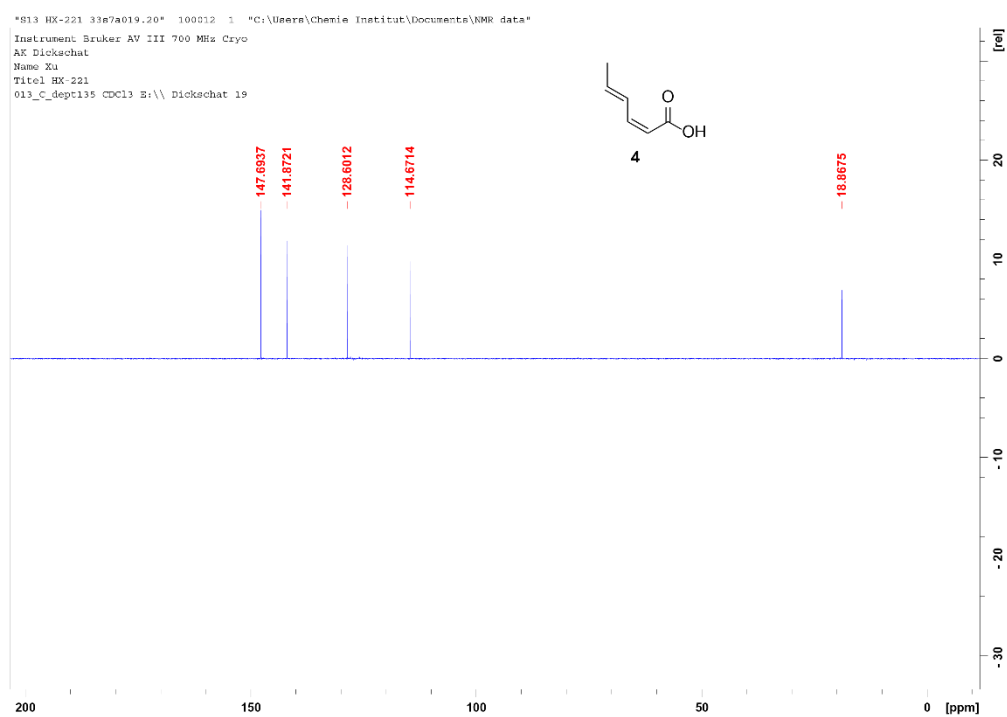

Figure S27.  $^{13}\text{C}$ -DEPT-135 NMR spectrum (176 MHz,  $\text{CDCl}_3$ ) of 4.

## SUPPORTING INFORMATION

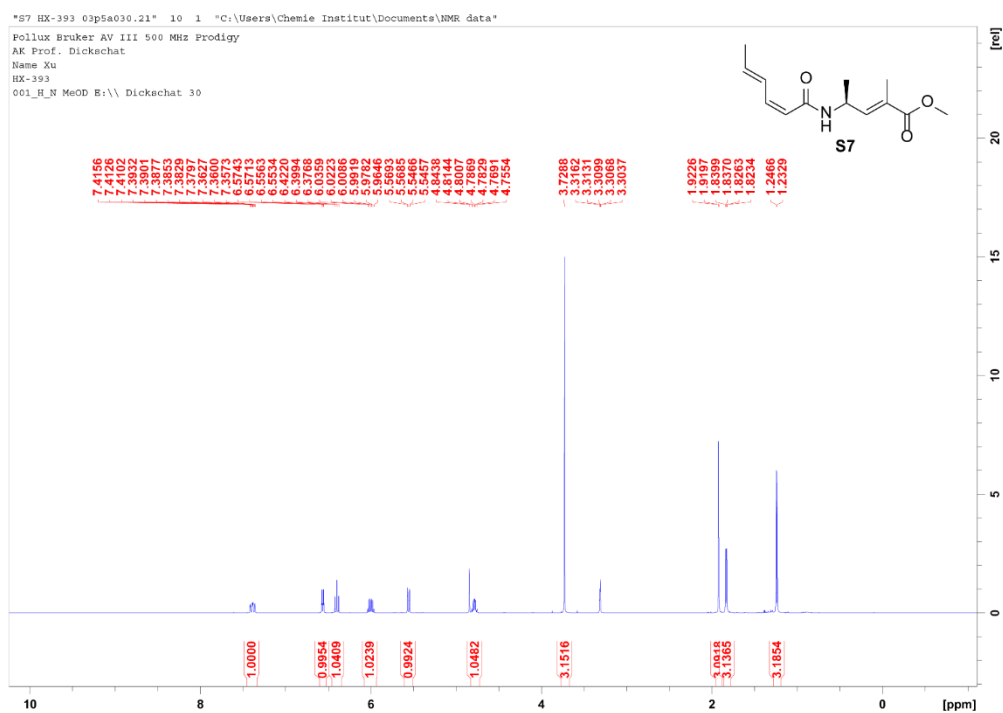Figure S28.  $^1\text{H}$  NMR spectrum (500 MHz,  $\text{CD}_3\text{OD}$ ) of S7.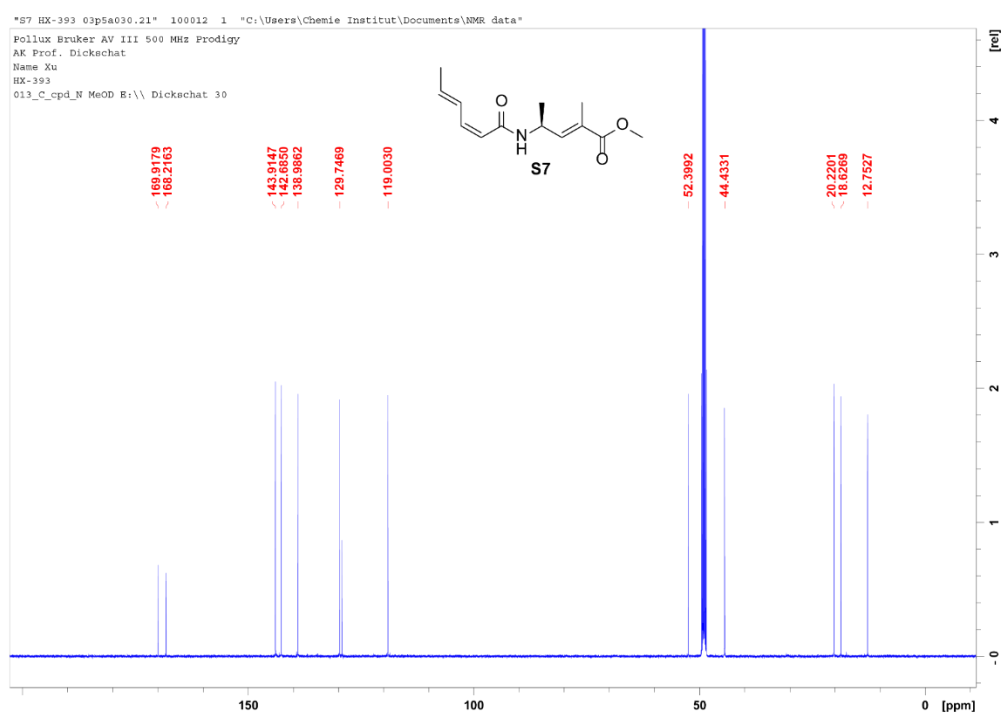Figure S29.  $^{13}\text{C}$  NMR spectrum (126 MHz,  $\text{CD}_3\text{OD}$ ) of S7.

## SUPPORTING INFORMATION

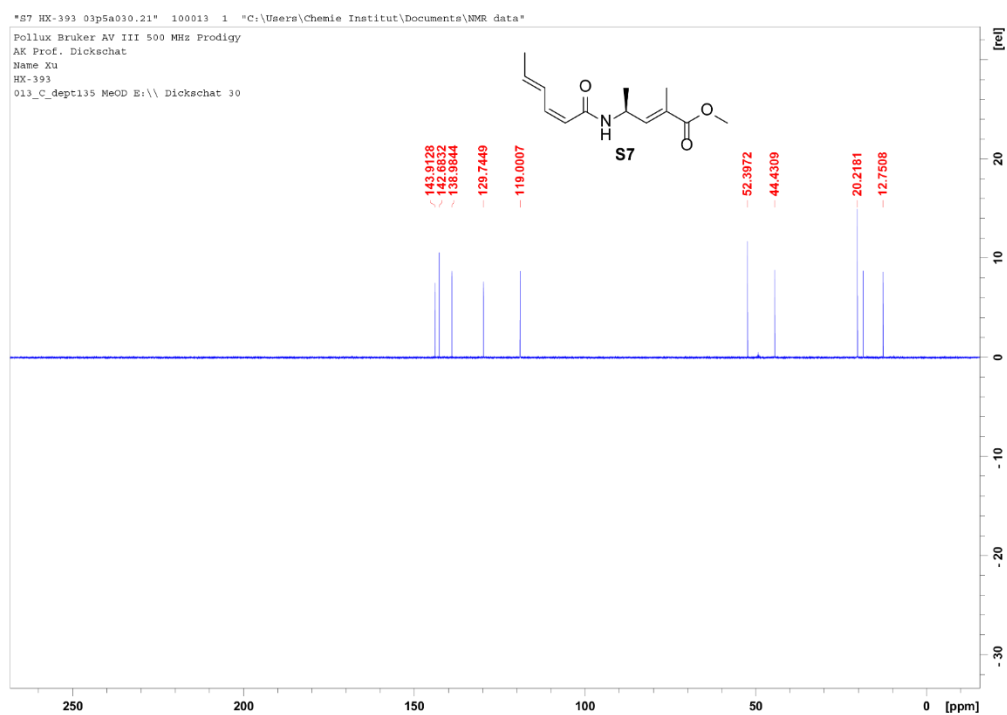

Figure S30.  $^{13}\text{C}$ -DEPT-135 NMR spectrum (126 MHz,  $\text{CD}_3\text{OD}$ ) of S7.

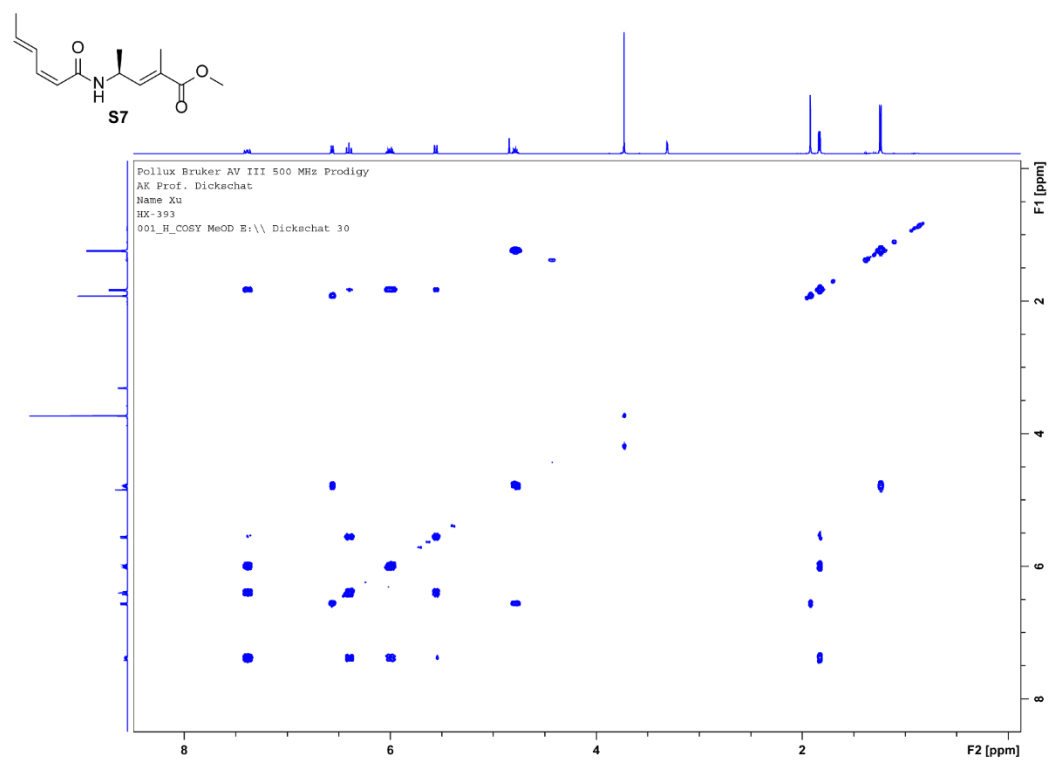

Figure S31.  $^1\text{H}$ - $^1\text{H}$  COSY spectrum (500 MHz,  $\text{CD}_3\text{OD}$ ) of S7.

## SUPPORTING INFORMATION

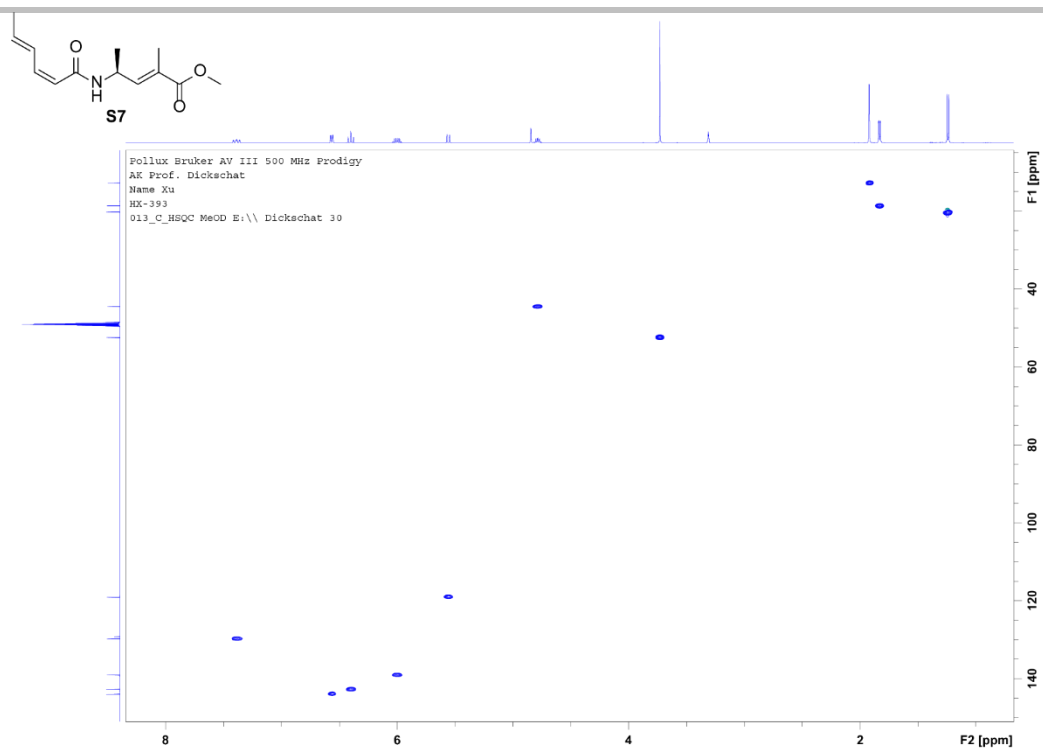**Figure S32.** HSQC spectrum ( $\text{CD}_3\text{OD}$ ) of **S7**.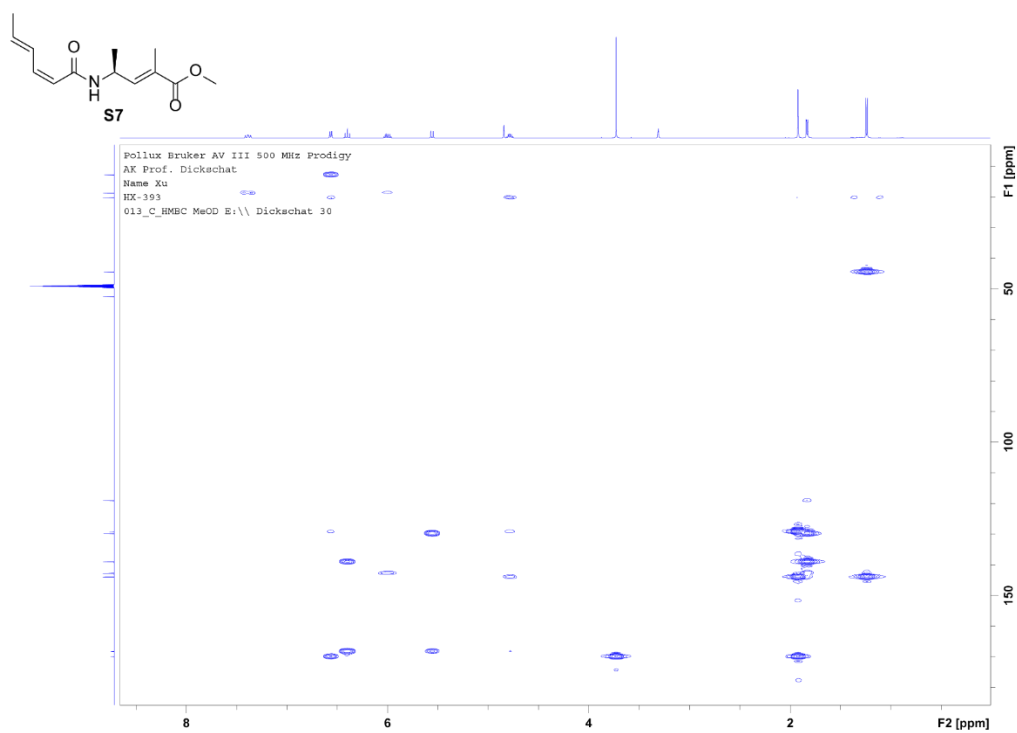**Figure S33.** HMBC spectrum ( $\text{CD}_3\text{OD}$ ) of **S7**.



## SUPPORTING INFORMATION

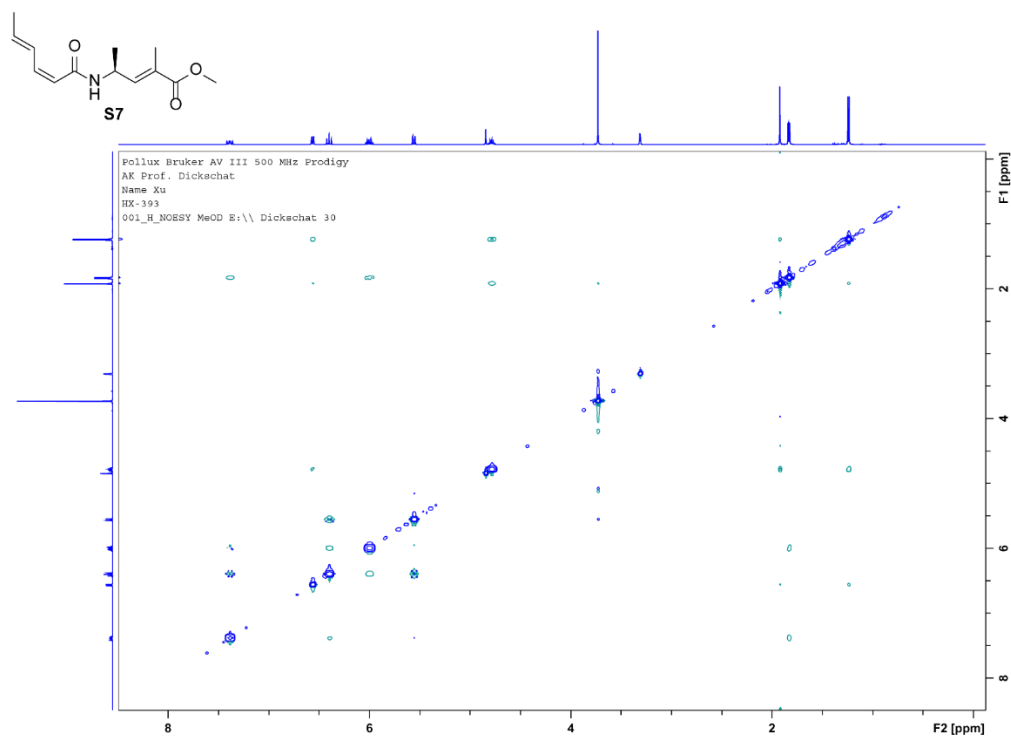Figure S34. NOESY spectrum (CD<sub>3</sub>OD) of S7.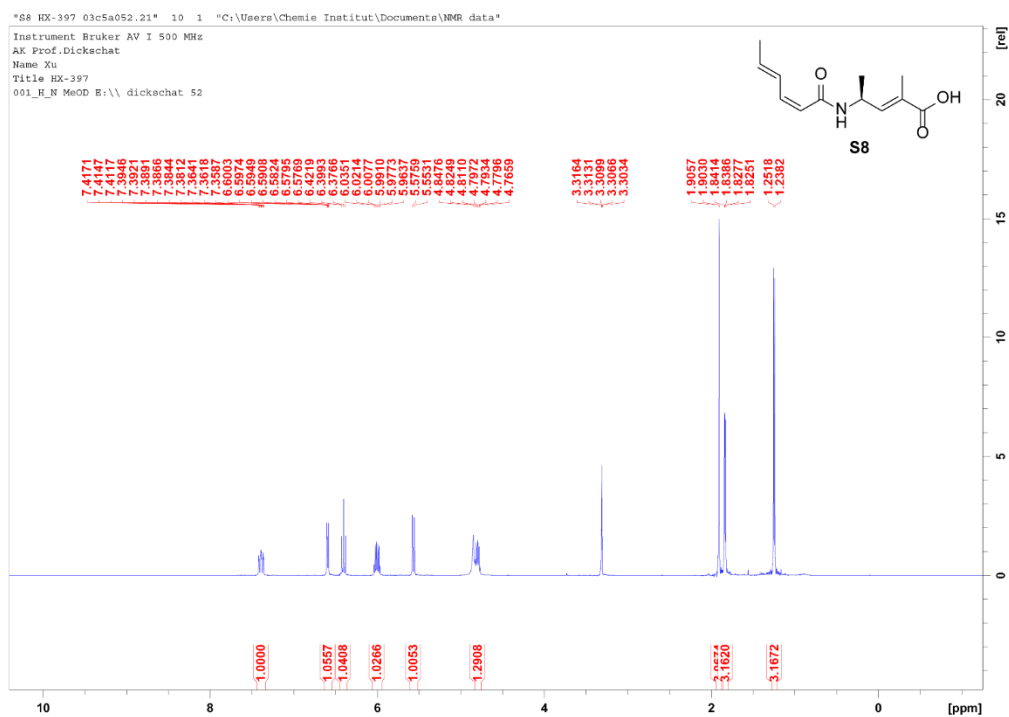Figure S35. <sup>1</sup>H NMR spectrum (500 MHz, CD<sub>3</sub>OD) of S8.

## SUPPORTING INFORMATION

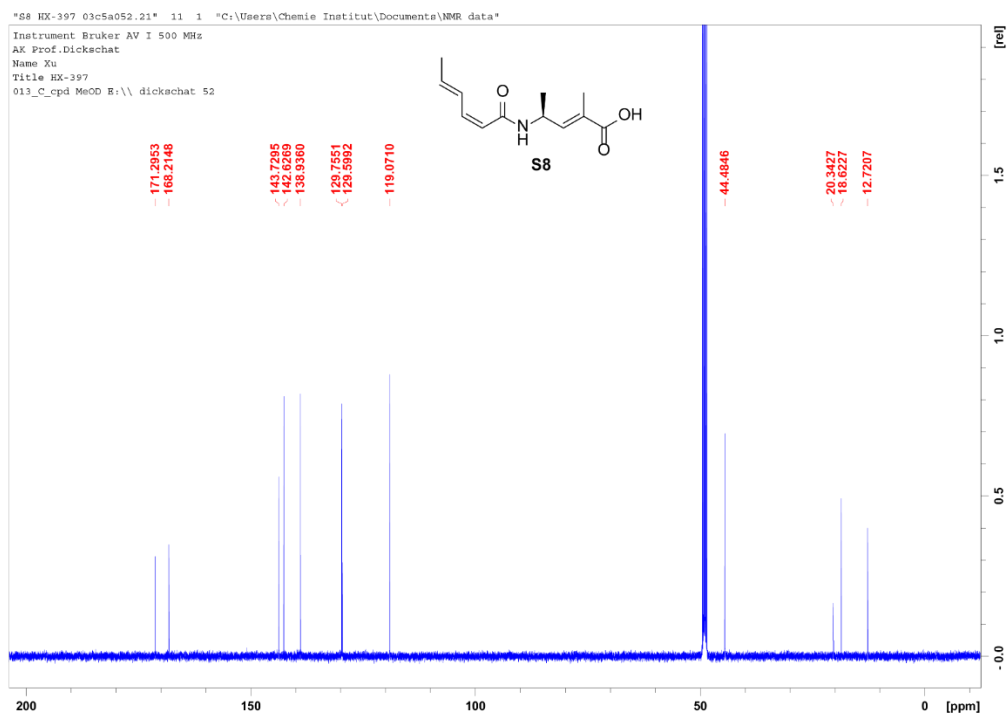

Figure S36.  $^{13}\text{C}$  NMR spectrum (126 MHz,  $\text{CD}_3\text{OD}$ ) of **S8**.

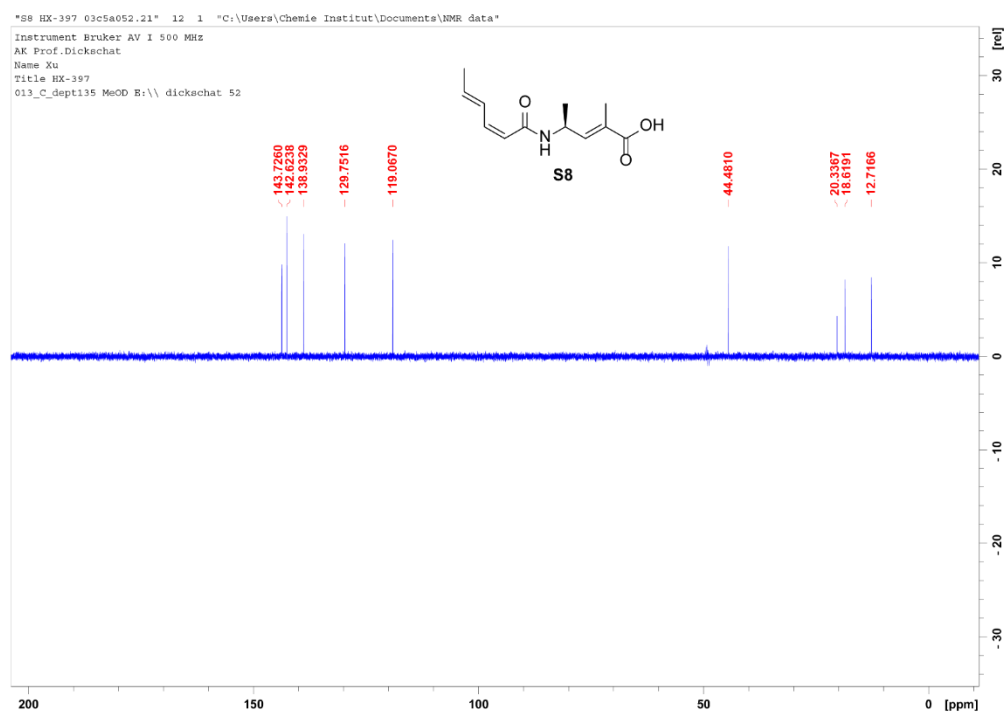

Figure S37.  $^{13}\text{C}$ -DEPT-135 NMR spectrum (126 MHz,  $\text{CD}_3\text{OD}$ ) of **S8**.

## SUPPORTING INFORMATION

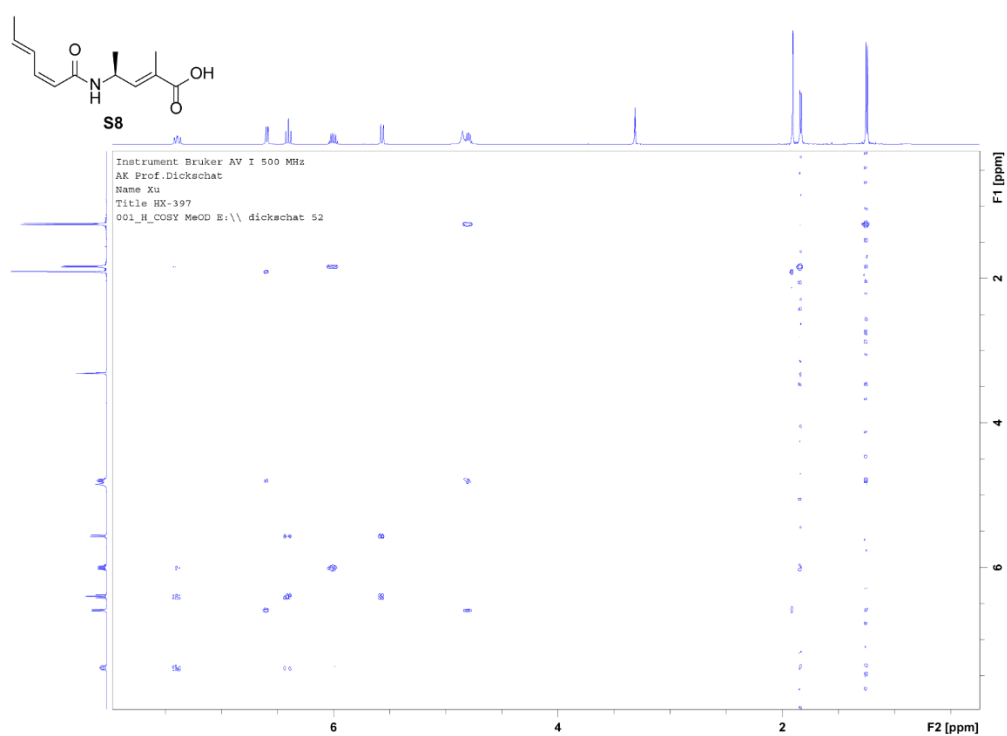

Figure S38.  $^1\text{H}$ - $^1\text{H}$  COSY spectrum (500 MHz,  $\text{CD}_3\text{OD}$ ) of **S8**.

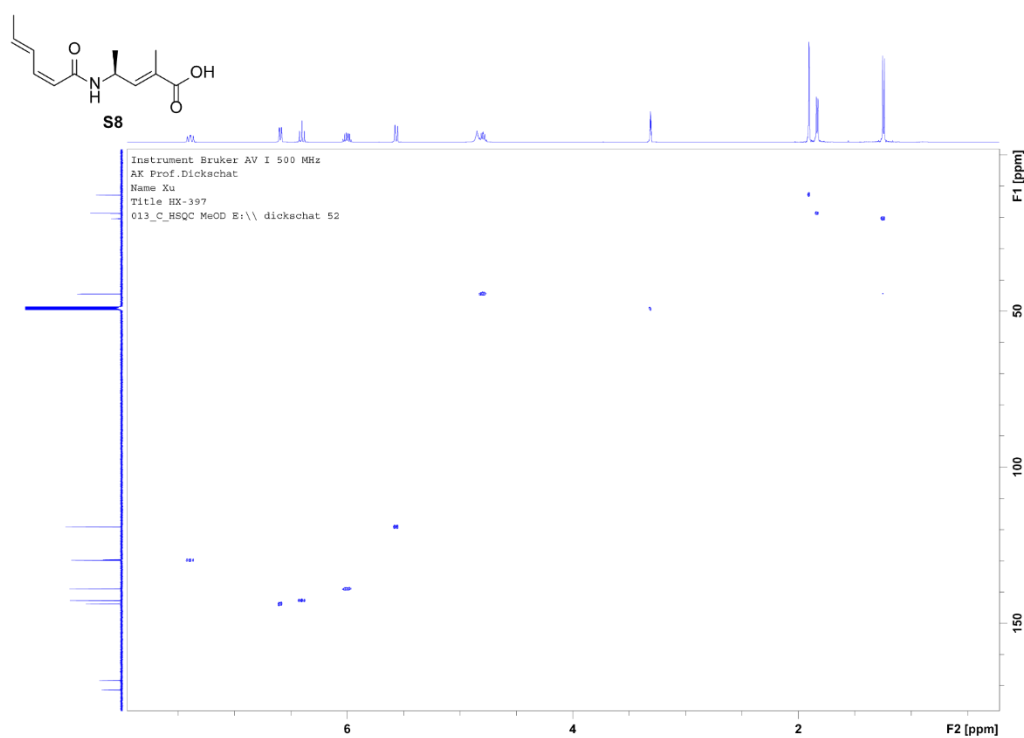

Figure S39. HSQC spectrum ( $\text{CD}_3\text{OD}$ ) of **S8**.

## SUPPORTING INFORMATION

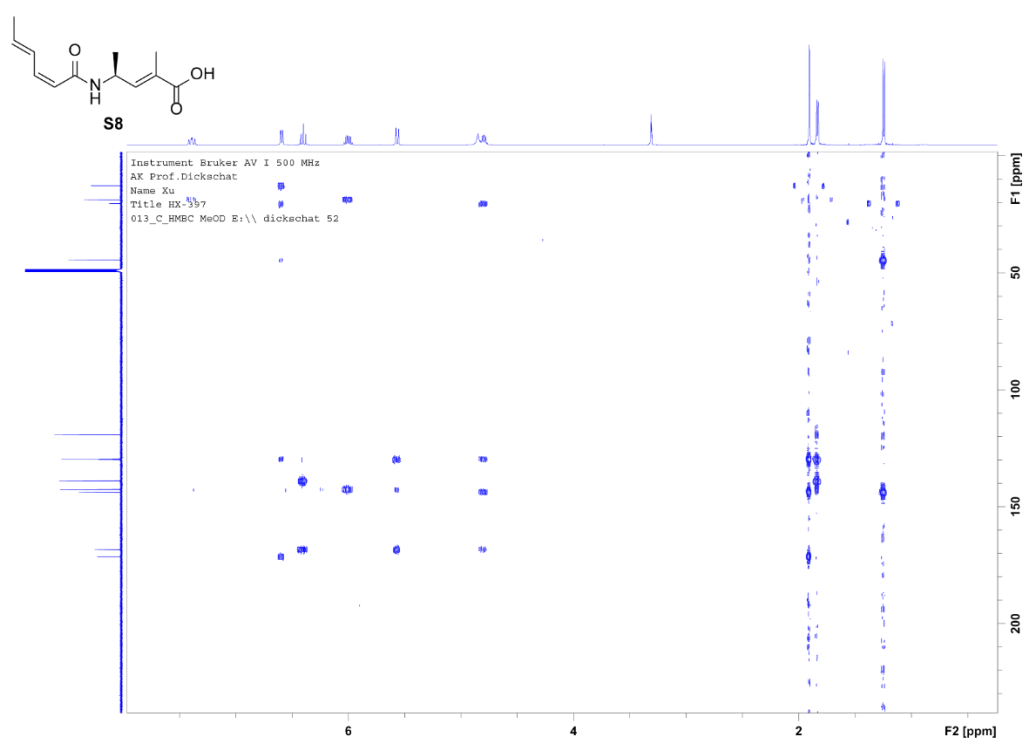Figure S40. HMBC spectrum ( $\text{CD}_3\text{OD}$ ) of **S8**.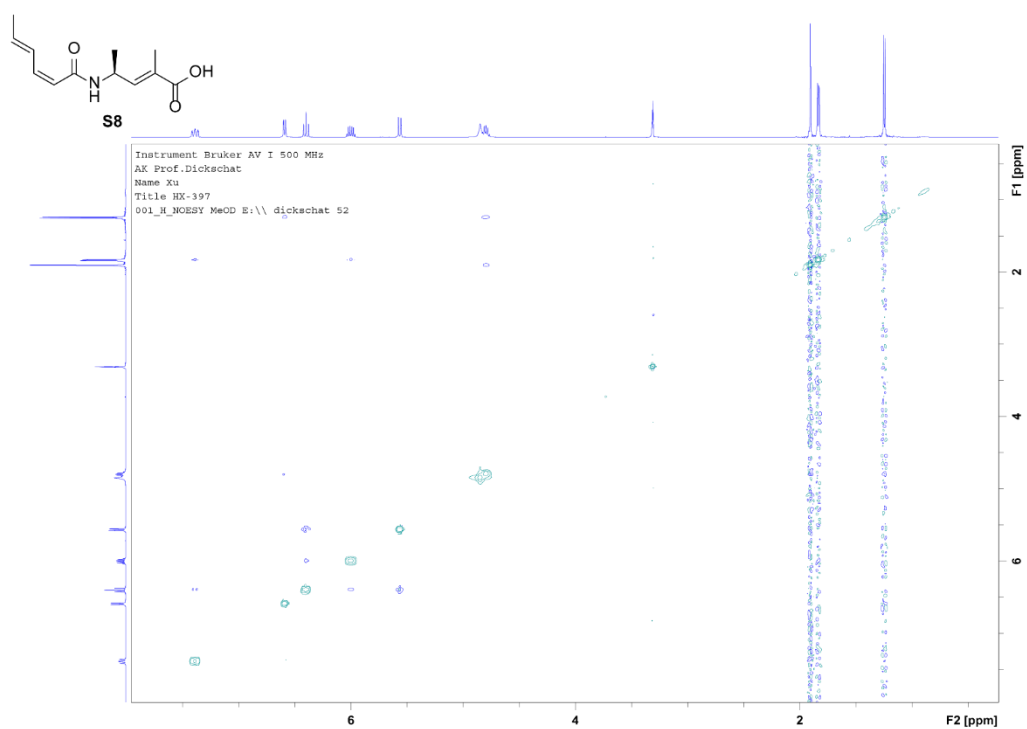Figure S41. NOESY spectrum ( $\text{CD}_3\text{OD}$ ) of **S8**.

## SUPPORTING INFORMATION

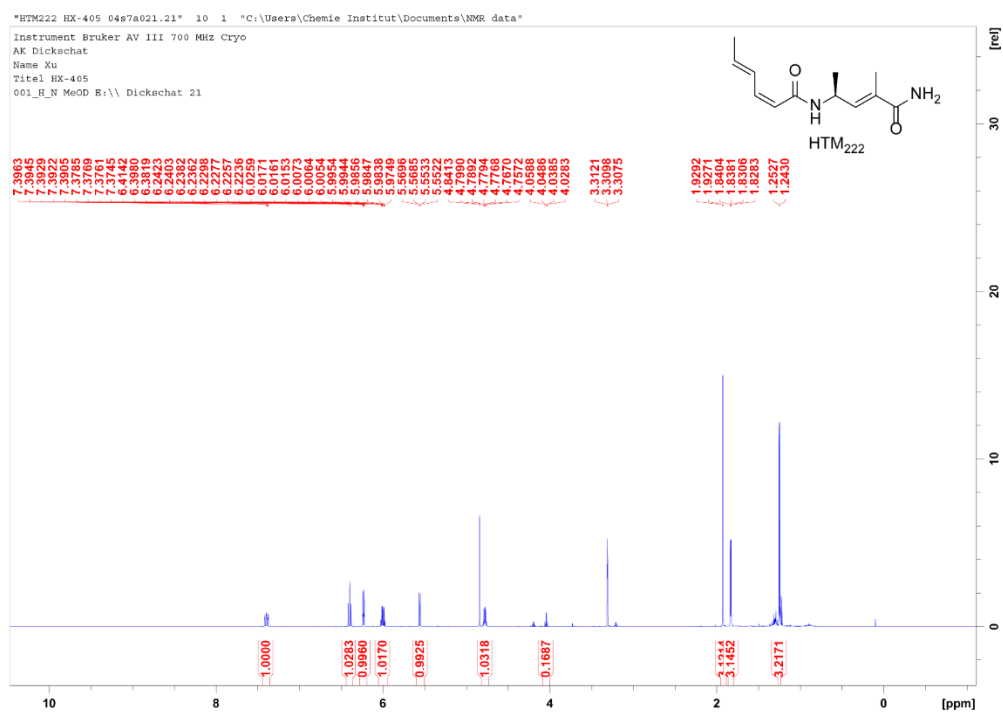Figure S42. <sup>1</sup>H NMR spectrum (700 MHz, CD<sub>3</sub>OD) of HTM<sub>222</sub>.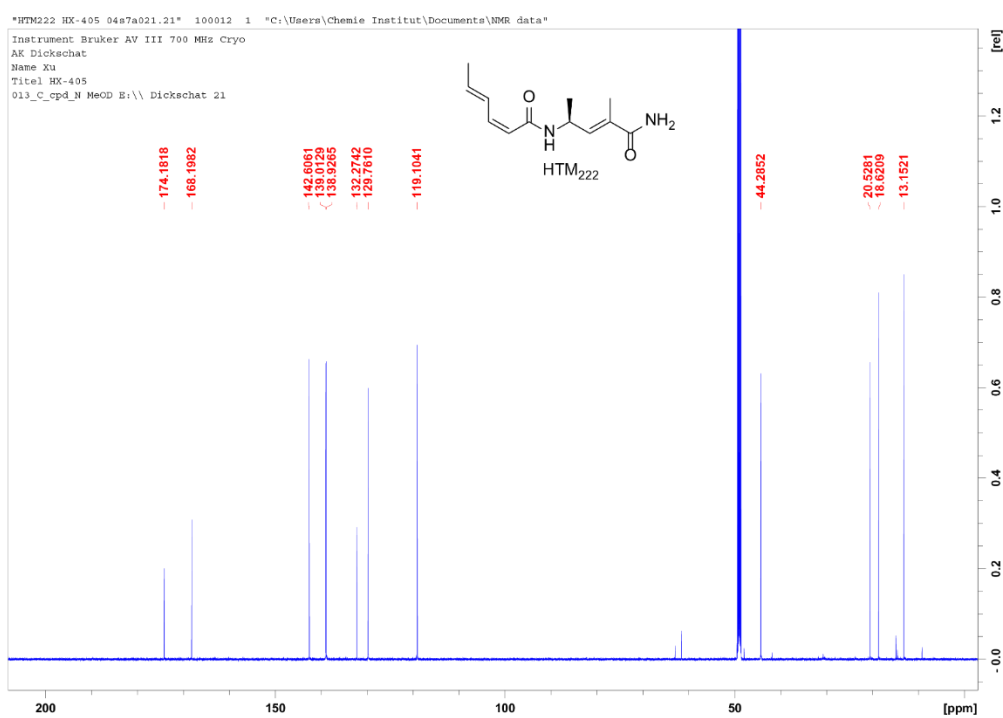Figure S43. <sup>13</sup>C NMR spectrum (176 MHz, CD<sub>3</sub>OD) of HTM<sub>222</sub>.

## SUPPORTING INFORMATION

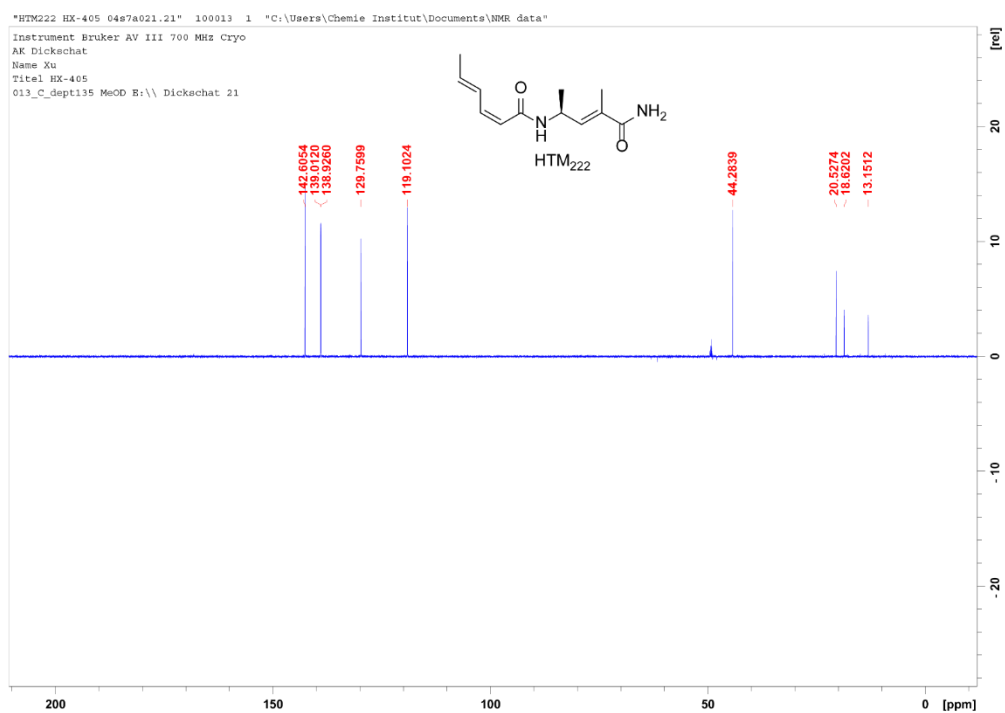

**Figure S44.** <sup>13</sup>C-DEPT-135 NMR spectrum (176 MHz, CD<sub>3</sub>OD) of HTM<sub>222</sub>.

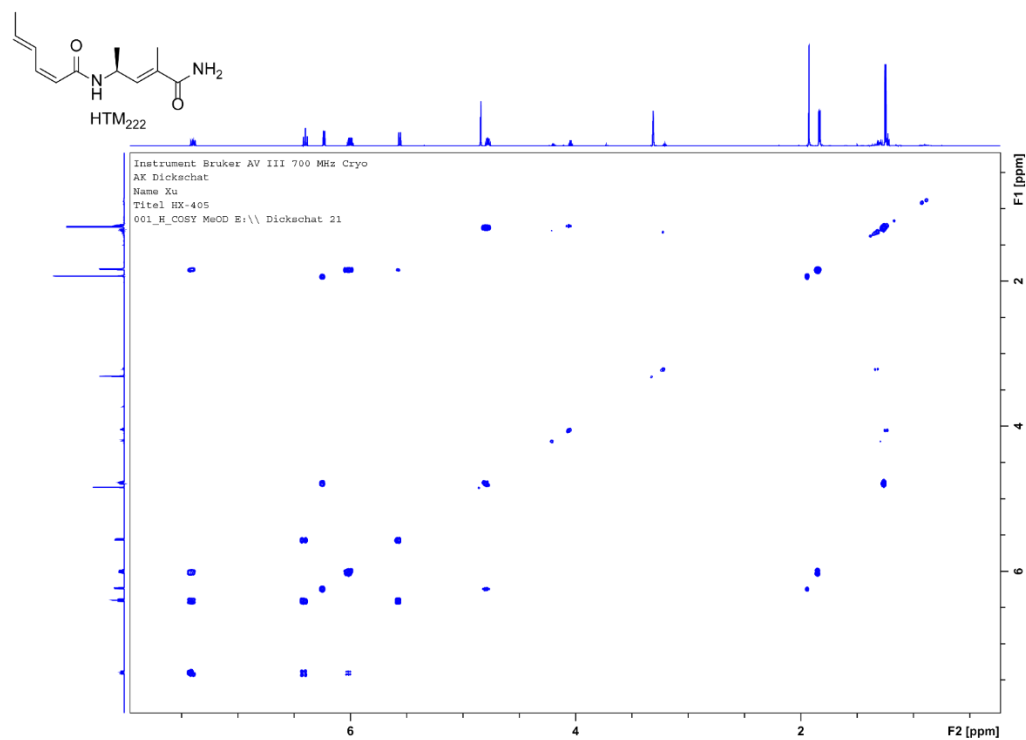

**Figure S45.** <sup>1</sup>H-<sup>1</sup>H COSY spectrum (700 MHz, CD<sub>3</sub>OD) of HTM<sub>222</sub>.

## SUPPORTING INFORMATION

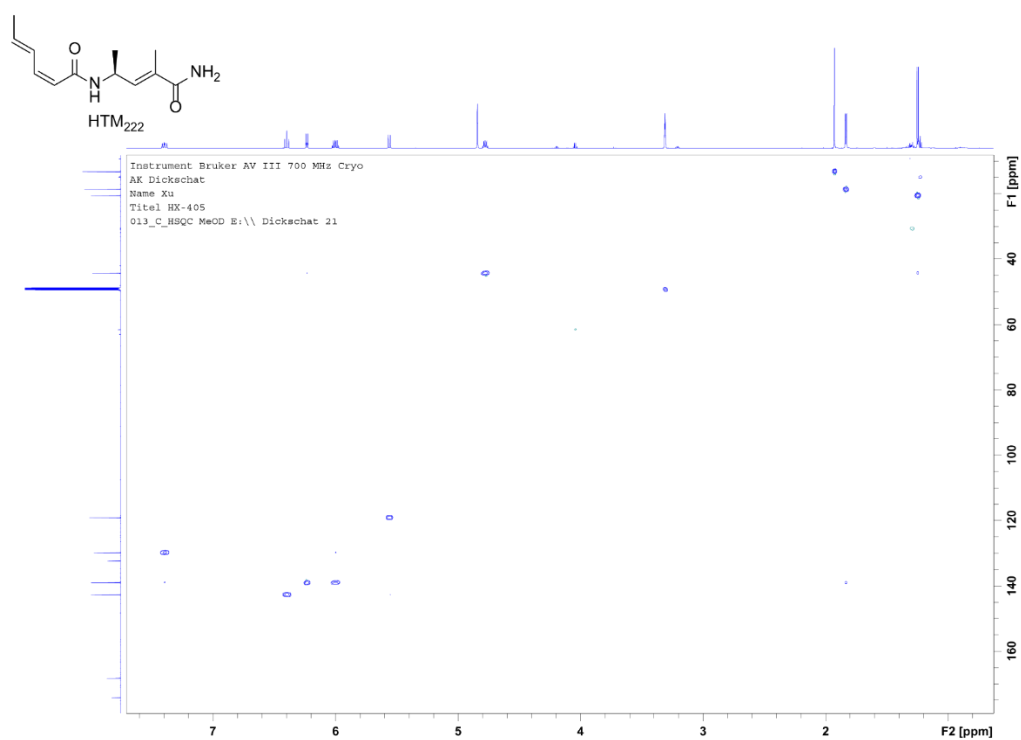

Figure S46. HSQC spectrum ( $\text{CD}_3\text{OD}$ ) of  $\text{HTM}_{222}$ .

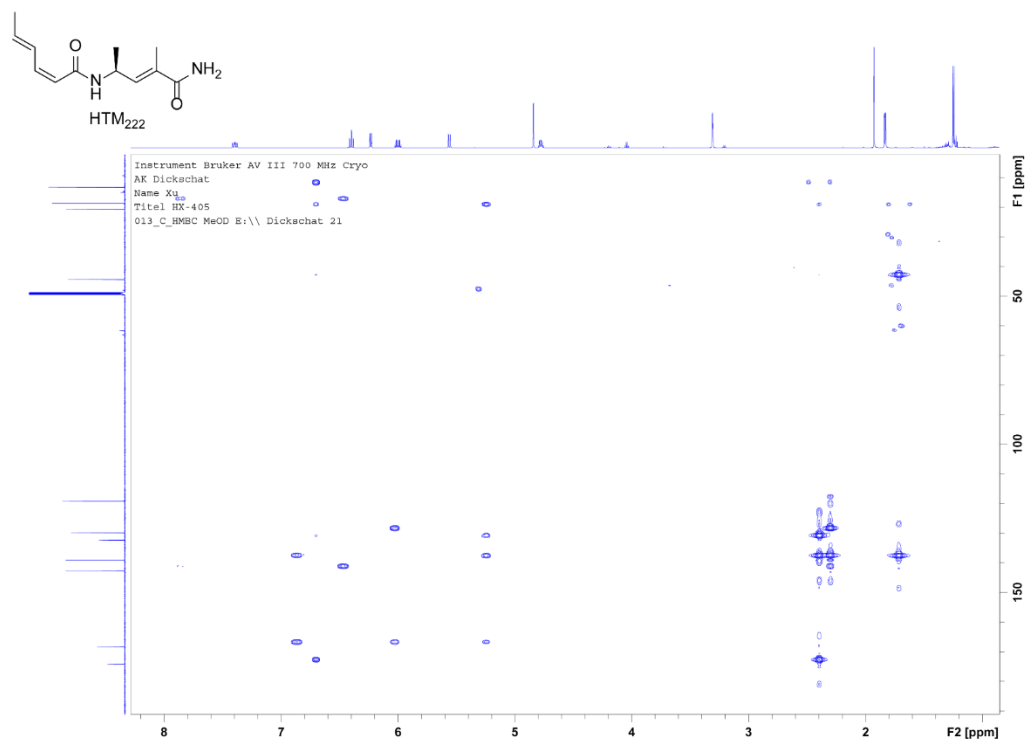

Figure S47. HMBC spectrum ( $\text{CD}_3\text{OD}$ ) of  $\text{HTM}_{222}$ .

## SUPPORTING INFORMATION

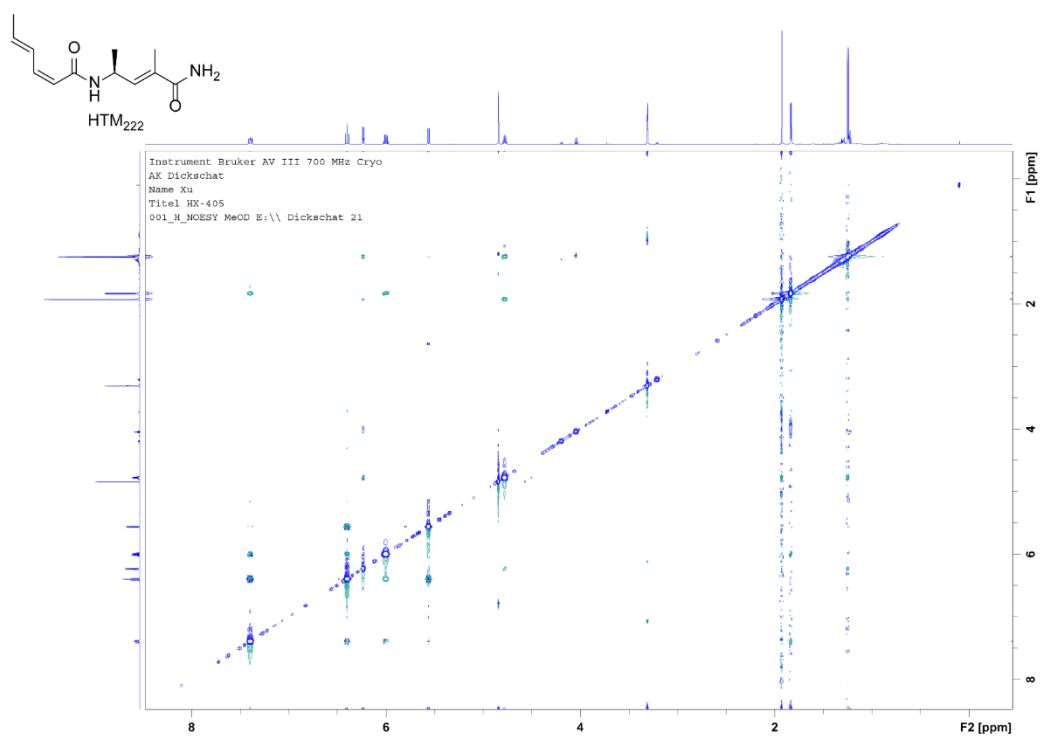

**Figure S48.** NOESY spectrum (CD<sub>3</sub>OD) of HTM<sub>222</sub>.



## SUPPORTING INFORMATION

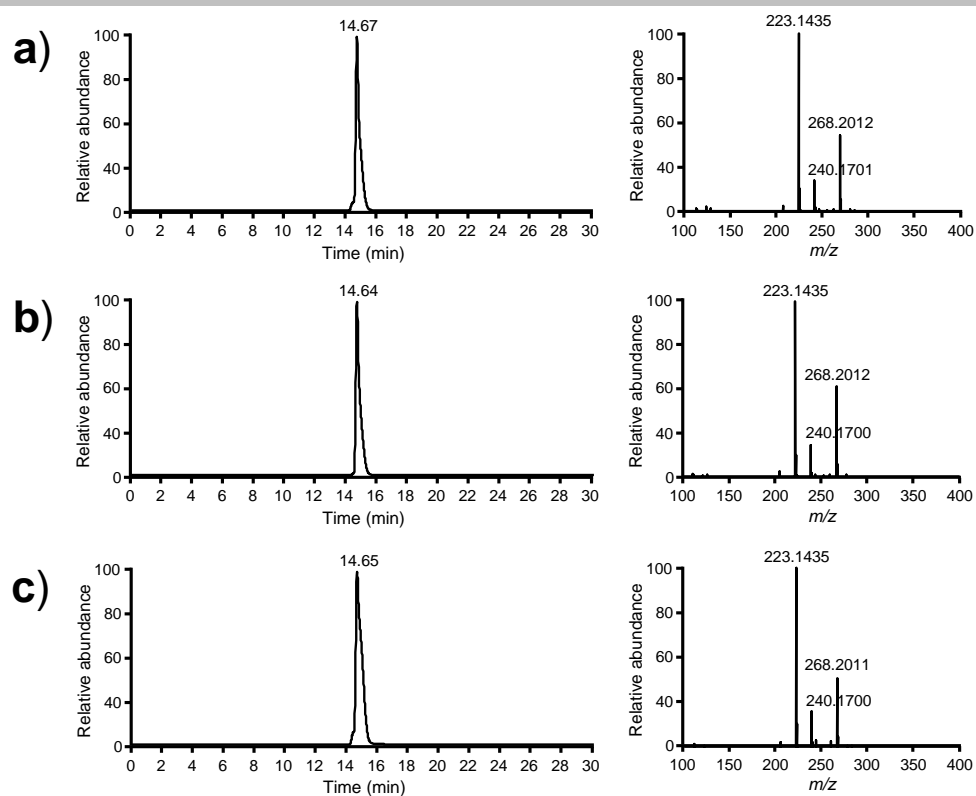

**Figure S49.** Identification of HTM<sub>222</sub> by LC-ESI-HRMS. Chromatogram and ESI mass spectrum of a) natural HTM<sub>222</sub> isolated from culture extracts, b) HTM<sub>222</sub> synthesized from L-alanine (Scheme S1b), and c) coinjection of natural and synthetic HTM<sub>222</sub>.

## SUPPORTING INFORMATION

**Table S4.** Deduced functions of ORFs in putativr HTM biosynthetic gene cluster.

| ORFs  | Amino acid | Proposed function                                              | Sequence similarity | Identity/Similarity |
|-------|------------|----------------------------------------------------------------|---------------------|---------------------|
| HtmA4 | 273        | Reductase (KR)                                                 | WP_030668949.1      | 272/273             |
| HtmI1 | 427        | Isochorismate synthase                                         | WP_030668946.1      | 391/393             |
| HtmB3 | 552        | AMP-dependent synthetase (A)                                   | WP_051854476.1      | 550/552             |
| HtmI2 | 210        | Isochorismate synthase                                         | WP_030668942.1      | 210/210             |
| HtmU1 | 187        | Unknown                                                        | WP_030668938.1      | 187/187             |
| HtmU2 | 320        | Unknown                                                        | WP_078868530.1      | 319/320             |
| HtmT  | 418        | Glycosyltransferase                                            | WP_138966001.1      | 376/417             |
| HtmR1 | 168        | Transcriptional regulator                                      | WP_030668931.1      | 155/155             |
| HtmO  | 460        | Amidase                                                        | WP_078868529.1      | 458/460             |
| HtmA5 | 251        | TEII                                                           | WP_037824320.1      | 248/251             |
| HtmA1 | 4821       | PKS                                                            | WP_158857389.1      | 4722/4816           |
|       |            | Loading module, GNAT-ACP                                       |                     |                     |
|       |            | Module 1: KS-ATd-DH-KR-ACP                                     |                     |                     |
|       |            | Module 2: KS-ATd-KR-ACP                                        |                     |                     |
|       |            | Module 3: KS-DH-ACP                                            |                     |                     |
|       |            | Module 4: KS-ATd-ACP                                           |                     |                     |
| HtmA2 | 7387       | PKS/NRPS                                                       | WP_030668919.1      | 7345/7389           |
|       |            | Module 5: C-A-PCP                                              |                     |                     |
|       |            | Module 6: KS-ATd-DH-KR-CMT-ACP                                 |                     |                     |
|       |            | Module 7: KS-ATd-ACP                                           |                     |                     |
|       |            | Module 8: C-A-PCP                                              |                     |                     |
|       |            | Module 9: KS-ATd-KR-ACP                                        |                     |                     |
| HtmA3 | 4748       | Module 10: KS-ATd-ACP-unknown domain)<br>PKS/NRPS              | QDQ09714.1          | 4181/4781           |
|       |            | ACP <sub>A1</sub> , ACP <sub>A2</sub> , ACP <sub>A3</sub> , Cd |                     |                     |
|       |            | Module 11: KS-ATd-KR-ACP                                       |                     |                     |
|       |            | ACP                                                            |                     |                     |
|       |            | Module 12: KS-ATd-DH-ACP                                       |                     |                     |
|       |            | Module 13: KS-ATd-KR-ACP                                       |                     |                     |
|       |            | Module 14: KS-ATd-ACP                                          |                     |                     |
| HtmB1 | 2548       | NRPS                                                           | WP_144001289.1      | 2416/2548           |
|       |            | Module 15: C-A-PCP                                             |                     |                     |
|       |            | Module 16: C-A-OMT-PCP                                         |                     |                     |
| HtmB2 | 3091       | NRPS                                                           | WP_144001288.1      | 2919/3099           |
|       |            | Module 17: C-A-PCP                                             |                     |                     |
|       |            | Module 18: C-A-NMT-PCP-C <sub>T</sub>                          |                     |                     |
| HtmA8 | 108        | ACP <sub>d</sub>                                               | WP_030670431.1      | 84/84               |
| HtmA6 | 407        | Ketosynthase (KS)                                              | WP_030670435.1      | 406/407             |
| HtmS  | 427        | Hydroxymethylglutaryl-CoA synthase                             | WP_030670438.1      | 425/430             |
| HtmH  | 786        | Enoyl-CoA hydratase                                            | WP_030670441.1      | 783/798             |
| HtmA7 | 647        | <i>trans</i> -AT <sub>1</sub> ; <i>trans</i> -AT <sub>2</sub>  | WP_078868641.1      | 642/644             |
| HtmP  | 411        | Cytochrome P450                                                | WP_030670448.1      | 411/411             |
|       |            |                                                                | WP_030670451.1      | 273/275             |
| HtmU4 | 275        | Unknown                                                        |                     |                     |
|       |            |                                                                | WP_030670456.1      | 134/135             |
| HtmU5 | 135        | Unknown                                                        |                     |                     |
|       |            |                                                                | WP_030670459.1      | 258/265             |
| HtmR2 | 265        | LysR family transcriptional regulator                          |                     |                     |
| HtmK  | 609        | Serine/threonine protein kinase                                | WP_051854586.1      | 585/587             |

GNAT, an adaptor domain for decarboxylation of malonyl-CoA to acetyl-CoA unit; KS, ketosynthase; AT, acyl transferase domain; ATd, AT docking domain domain; DH, dehydratase domain; KR, ketoreductase domain; CMT, C-methyltransferase domain; OMT, O-methyltransferase domain; NMT, N-methyltransferase domain; ACP, acyl carrier protein; TE, thioesterase; A, adenylation domain; C, condensation domain; Cd, C-terminal domain; C<sub>T</sub>, terminal condensation domain; PCP, peptidyl carrier protein domain.

## SUPPORTING INFORMATION

---

**Gene deletion or site-directed mutation in vivo.** The recombinant plasmids used for gene disruption and site-directed mutation were introduced into *S. spectabilis* CCTCC M2017417 by conjugation using donor strain *E. coli* ET12567/pUZ8002 on ABB13 plates. After incubation at 28 °C for 12 h, the plate was overlaid with the final concentration of 35 µg/mL apramycin and 30 µg/mL nalidixic acid. Exconjugants were selected on ABB13 plates supplied with 35 µg/mL apramycin and 30 µg/mL nalidixic acid to check their antibiotic resistance. Then single colonies were patched onto ABB13 plates containing 35 µg/mL apramycin and onto ABB13 plates without antibiotic, respectively, to screen for the double crossover mutant. The mutant candidates with correct phenotype (Apr<sup>R</sup>) were further verified by PCR and sequencing with corresponding primers (Table S2).

**Construction of gene deletion plasmids.** To knock out the *htm* gene cluster, two homologous recombination fragments of 2061 bp and 2060 bp flanking the ~92 kb *htm* cluster in the genome were amplified by PCR using two pairs of primers htm-L-up and htm-L-re, htm-R-up and htm-R-re, respectively (Table S2). These two fragments were then cloned into the *Streptomyces-E. coli* shuttle vectors pYH7<sup>[4]</sup> treated with *Nde*I and *Hind*III by Gibson method to create the recombinant plasmid pWHU5001. To verify the plasmid and the mutant, a pair of primers htm-confirm-up and htm-confirm-re (Table S2) flanking the deletion region were used for PCR and sequencing.

## SUPPORTING INFORMATION

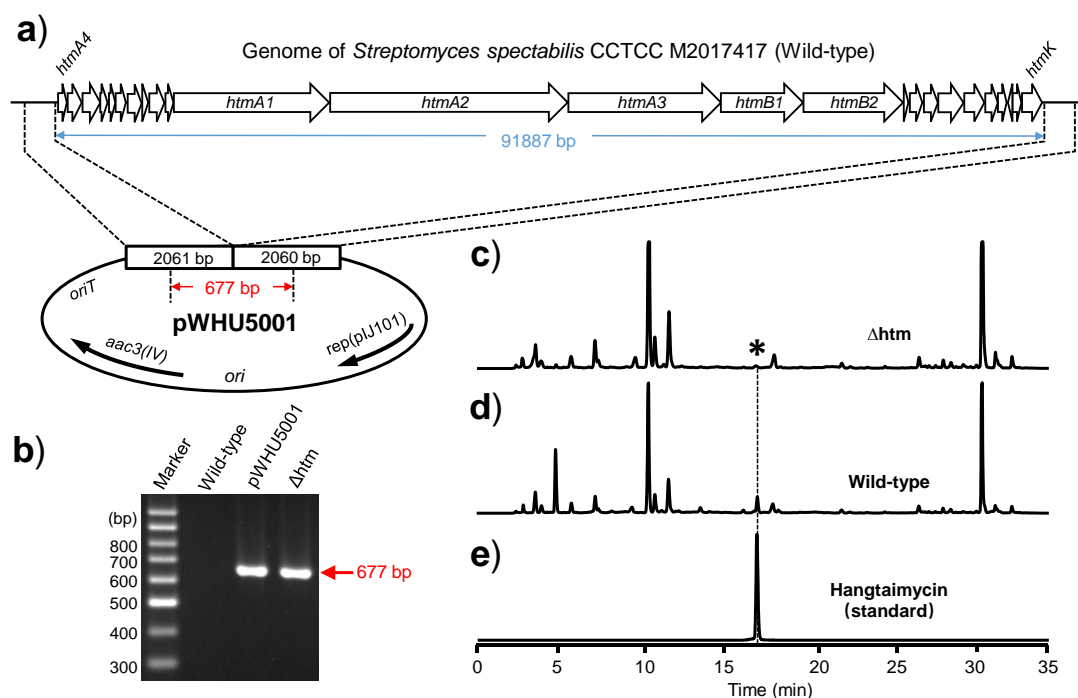

**Figure S50.** Deletion of the entire HTM biosynthetic gene cluster and its verification. a) Gene cluster deletion mediated by double homologous recombination in *Streptomyces spectabilis* CCTCC M2017417. b) Confirmation of the mutant by PCR (red arrows indicate the size of the PCR product expected for the Δhtm mutant). c–e) HTM production detected by HPLC (asterisk indicates absence of HTM). The plasmid pWHU5001 and wild-type genomic DNA were used as positive and negative control, respectively.

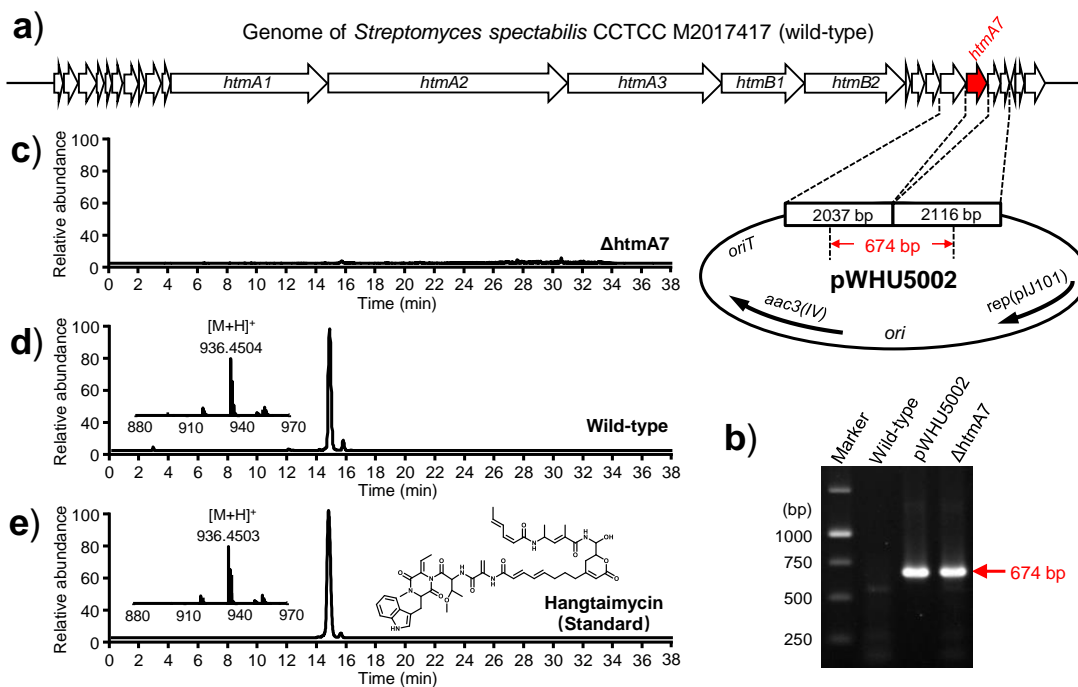

**Figure S51.** Scheme presentation of *htmA7* deletion and verification. a) In-frame deletion of *htmA7* mediated by double homologous recombination in vivo. b) The mutant is confirmed by PCR amplification and sequencing using the genomic DNA from the mutant, wild-type strain (negative control) and plasmid pWHU5002 (positive control) as the template. c–e) HTM production was detected by LC-ESI-HRMS analysis. The size of predicted and observed PCR fragments are shown by red solid arrows.

## SUPPORTING INFORMATION

**Construction of site-directed mutation plasmids.** To construct site-directed mutation plasmids of KR<sub>1</sub>, DH<sub>1</sub>, KR<sub>2</sub>, ACP<sub>2</sub>, KS<sub>3</sub>, DH<sub>3</sub> and ACP<sub>3</sub>, each two homologous recombination fragments were amplified by overlapping PCR using primer pairs listed in Table S2, then fused into the shuttle vector pYH7 digested with *Nde*I and *Hind*III to yield the corresponding recombinant plasmids (Table S1).

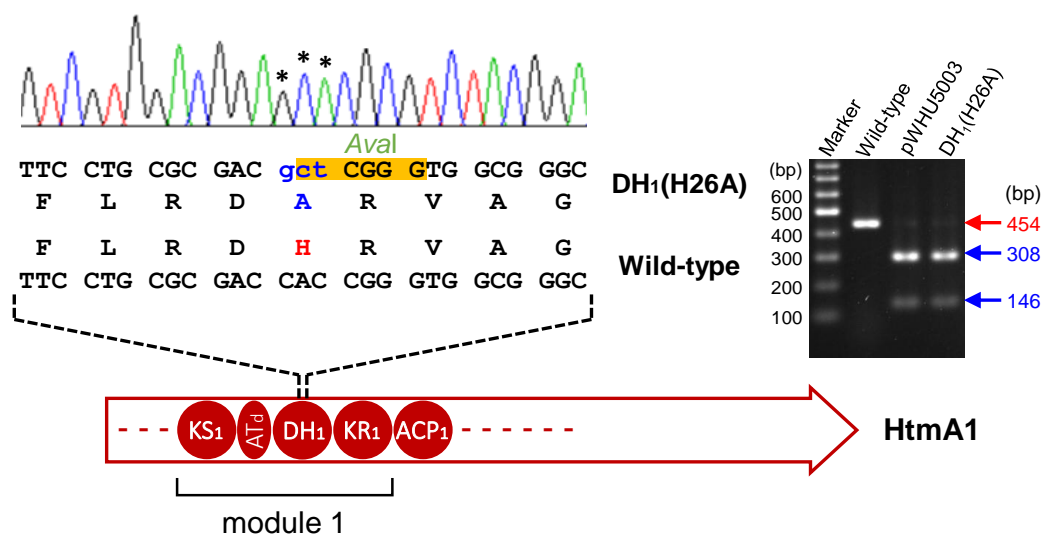

**Figure S52.** Site-directed mutation of DH<sub>1</sub> in module 1 of HtmA1. The histidine (H) in active motif HxxxGxxxxP was mutated to alanine (A). The changed nucleic acids and corresponding amino acid are shown in blue and marked with asterisks. An *Ava*I restriction site which is used for mutant candidate screening by PCR is highlighted in yellow. The PCR product of mutation was confirmed by restriction enzyme digestion and sequencing. The plasmid pWHU5003 and wild-type genomic DNA were used as positive and negative control, respectively.

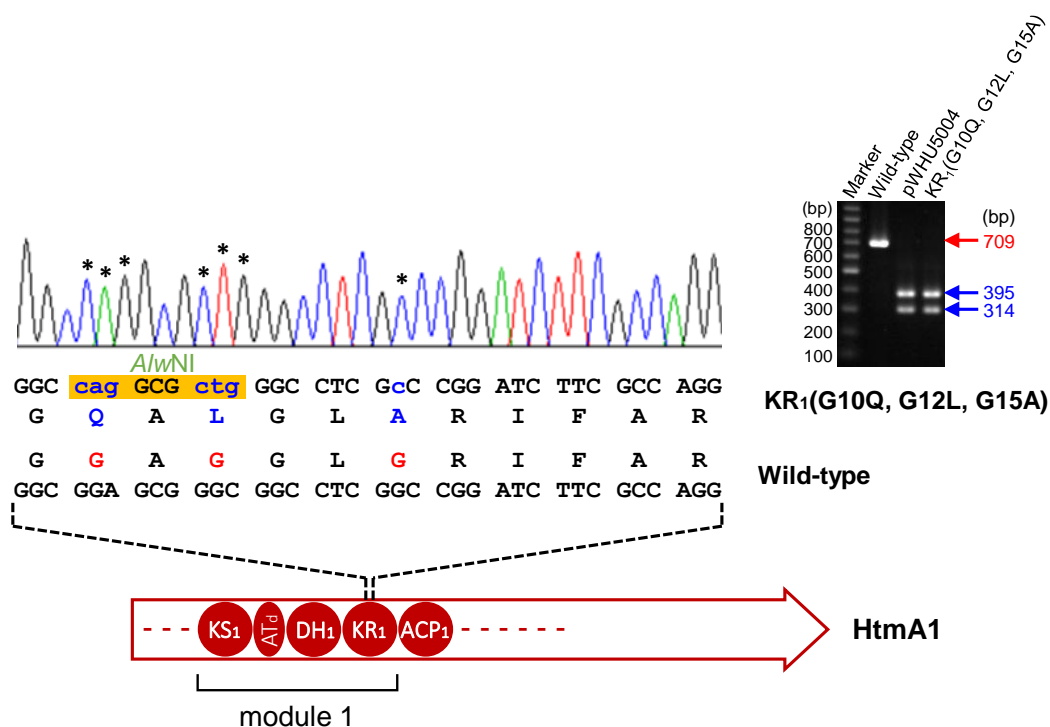

**Figure S53.** Site-directed mutation of KR<sub>1</sub> in module 1 of HtmA1. Three glycines (G) in NADPH binding site of GxGxxGxxxxA were mutated to glutamine (Q), leucine (L) and alanine (A), respectively. The changed nucleic acids and corresponding amino acids are shown in blue and marked with asterisks. An *A/w*NI restriction site which is used for mutant candidate screening by PCR is highlighted in yellow. The PCR product of mutation was confirmed by restriction enzyme digestion and sequencing. The plasmid pWHU5004 and wild-type genomic DNA were used as positive and negative control, respectively.

## SUPPORTING INFORMATION

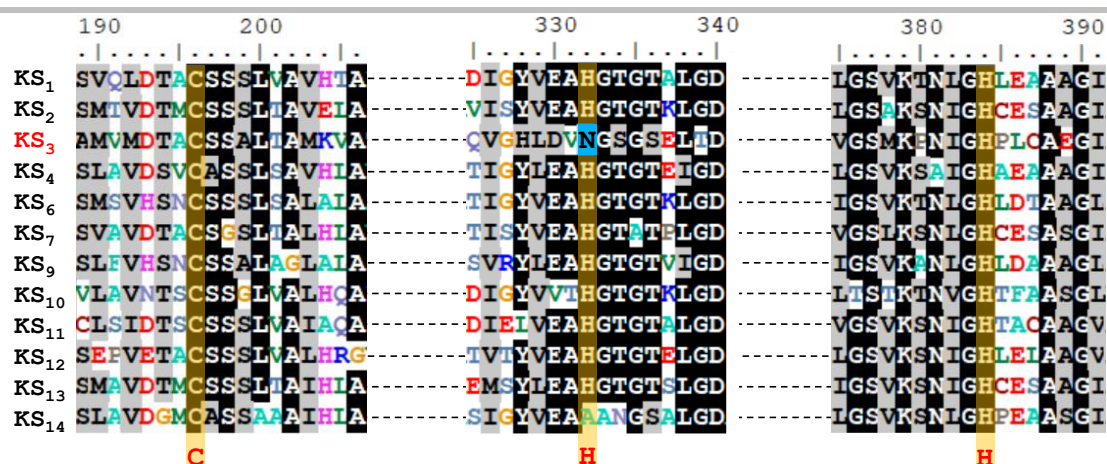

**Figure S54.** The partial sequence alignment of KS in Htm PKS. The active site triad that is required for Claisen condensation activity are highlighted as C-H-H. A native variation (N<sub>332</sub>) in the catalytic trail of KS<sub>3</sub> is indicated against blue background.

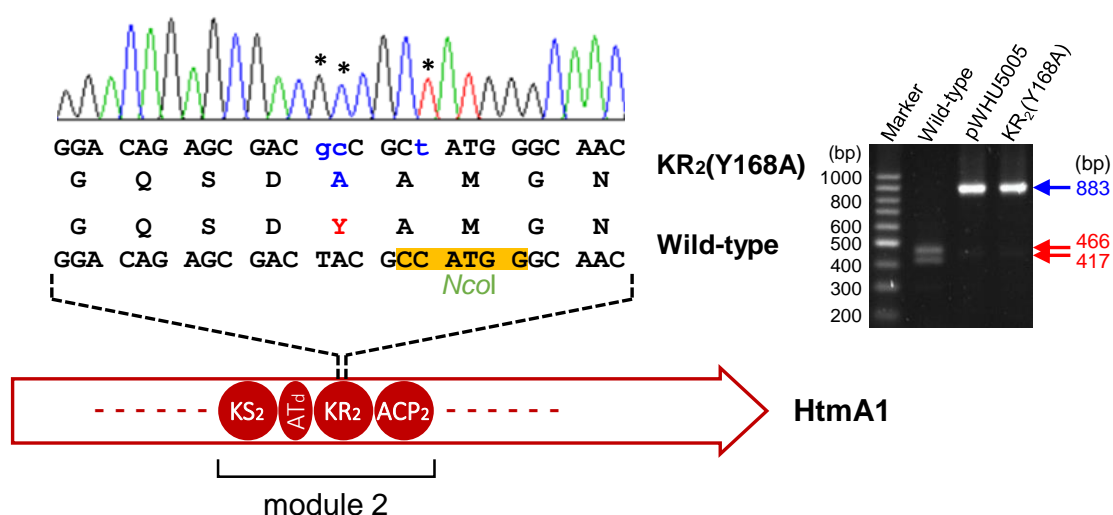

**Figure S55.** Site-directed mutation of KR<sub>2</sub> in module 2 of HtmA1. The tyrosine (Y) in active motif was mutated to alanine (A). The changed nucleic acids and corresponding amino acid are shown in blue and marked with asterisks. A NcoI restriction site which is destroyed in mutant for candidate screening by PCR is highlighted in yellow. The PCR product of mutation was confirmed by restriction enzyme digestion and sequencing. The plasmid pWHU5005 and wild-type genomic DNA were used as positive and negative control, respectively.

## SUPPORTING INFORMATION

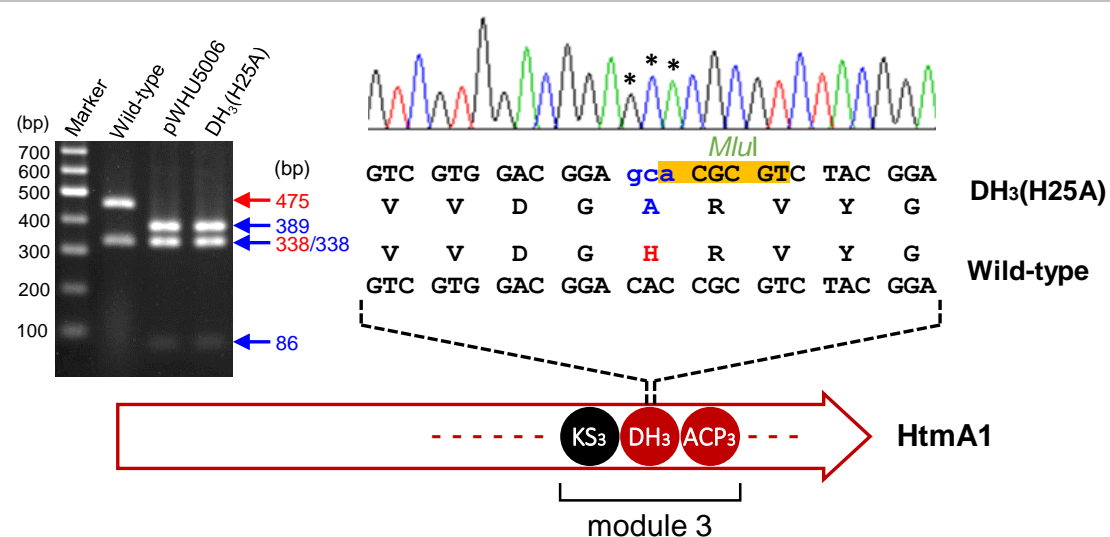

**Figure S56.** Site-directed mutation of DH<sub>3</sub> in module 3 of HtmA1. The histidine (H) in active motif HxxxGxxxxP was mutated to alanine (A). The changed nucleic acids and corresponding amino acid are shown in blue and marked with asterisks. A *MluI* restriction site which is used for mutant candidate screening by PCR is highlighted in yellow. The PCR product of mutation was confirmed by restriction enzyme digestion and sequencing. The plasmid pWHU5006 and wild-type genomic DNA were used as positive and negative control, respectively.

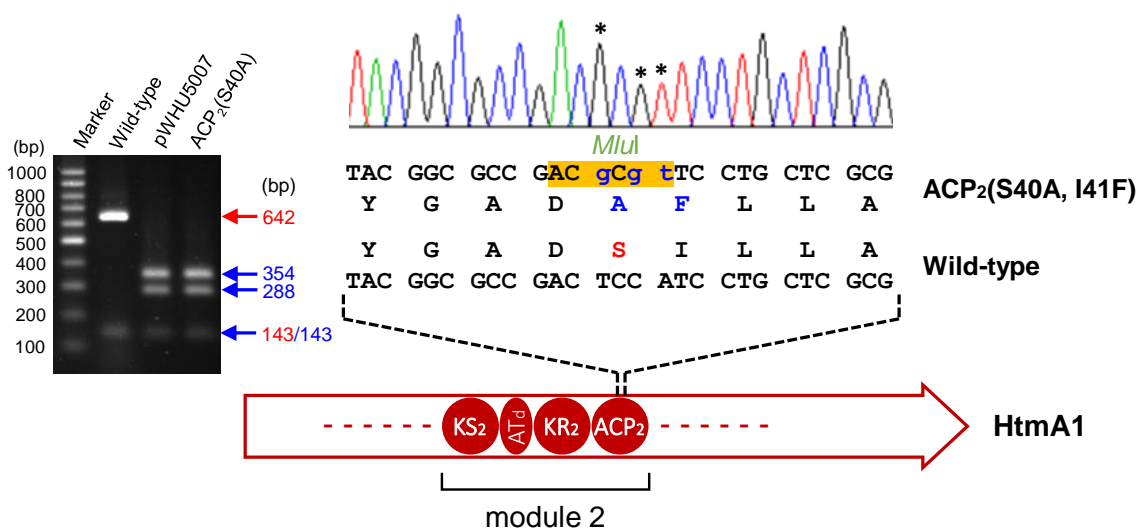

**Figure S57.** Site-directed mutation of ACP<sub>2</sub> in module 2 of HtmA1. The active site of ACP<sub>2</sub> was mutated from serine (S) to alanine (A). The changed nucleic acids and corresponding amino acid are shown in blue and marked with asterisks. A *MluI* restriction site which is used for mutant candidate screening by PCR is highlighted in yellow. The PCR product of mutation was confirmed by restriction enzyme digestion and sequencing. The plasmid pWHU5007 and wild-type genomic DNA were used as positive and negative control, respectively.

## SUPPORTING INFORMATION

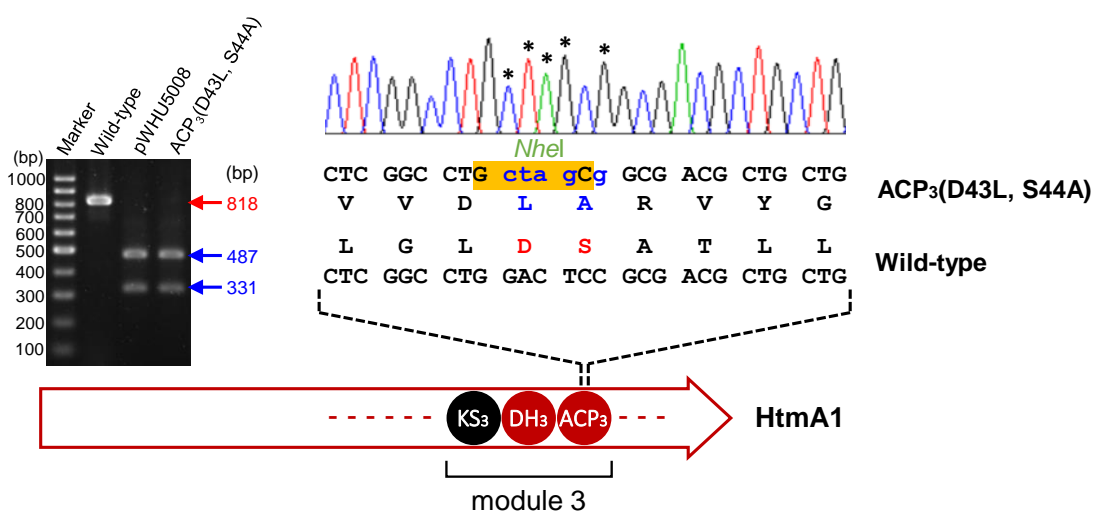

**Figure S58.** Site-directed mutation of ACP<sub>3</sub> in module 3 of HtmA1. The active site of ACP<sub>3</sub> was mutated from serine (S) to alanine (A) coupling with another mutation from aspartic acid (D) to leucine (L). The changed nucleic acids and corresponding amino acids are shown in blue and marked with asterisks. A *Nhe*I restriction site which is used for mutant candidate screening by PCR is highlighted in yellow. The PCR product of mutation was confirmed by restriction enzyme digestion and sequencing. The plasmid pWHU5008 and wild-type genomic DNA were used as positive and negative control, respectively.

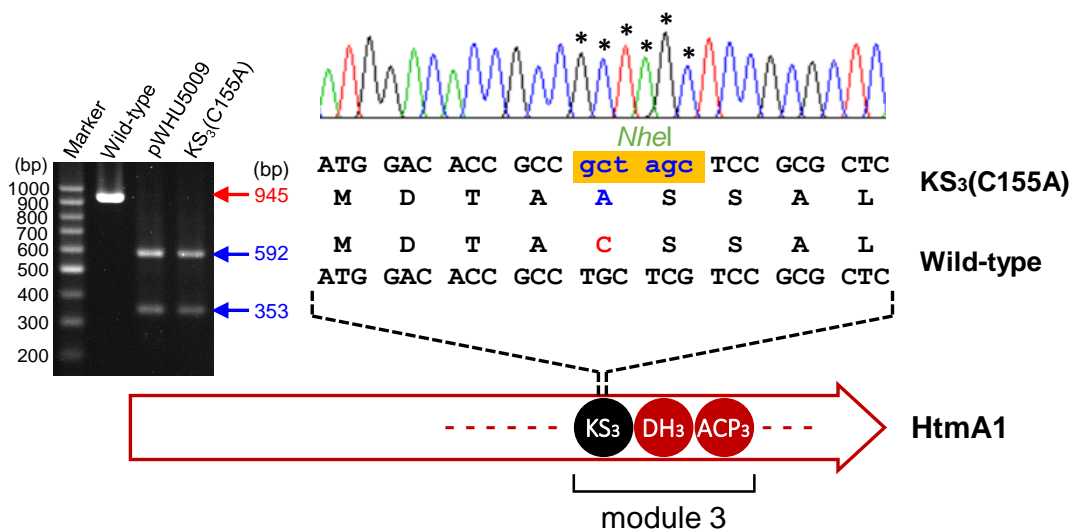

**Figure S59.** Site-directed mutation of KS<sub>3</sub> in module 3 of HtmA1. The cysteine (C) in substrate binding site was mutated to alanine (A). The changed nucleic acids and corresponding amino acid are shown in blue and marked with asterisks. A *Nhe*I restriction site which is used for mutant candidate screening by PCR is highlighted in yellow. The PCR product of mutation was confirmed by restriction enzyme digestion and sequencing. The plasmid pWHU5009 and wild-type genomic DNA were used as positive and negative control, respectively.



## SUPPORTING INFORMATION

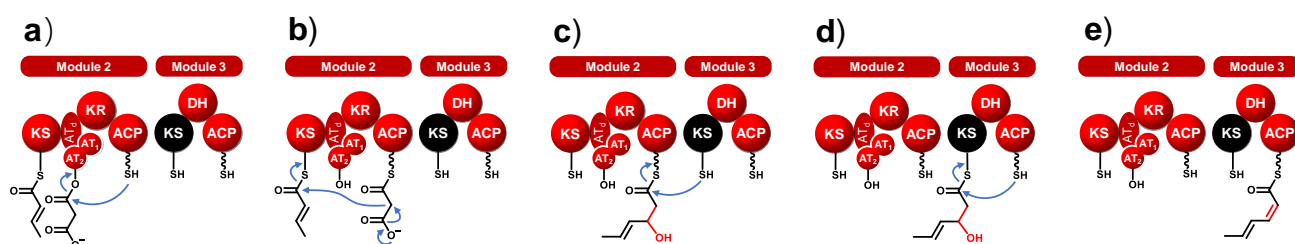

**Figure S60.** Proposed mechanism of the dehydrating bimodule (modules 2 and 3) of HtmA1. a, b) Elongation to the triketide by module 2 with malonyl-CoA, c) ketoreduction by KR<sub>2</sub> and transfer to KS<sub>3</sub> that only acts as transacylase (non-elongating), d, e) transfer to ACP<sub>3</sub> and dehydration.

## SUPPORTING INFORMATION

**Construction of protein expression plasmids.** The expression plasmids for module 1, module 2, module 3 and module 3 containing the mutated  $KS_3$  domain were generated by PCR amplifying with primes listed in Table S2, then inserted it into vector pET28a(+) to yield the corresponding recombinant plasmids (Table S1).

**Expression and purification of proteins.** For expression of *holo*-module 2, *holo*-module 3, *holo*-module 3( $KS_3$ (C155A)), the host strain was *E. coli* BAP1.<sup>[2]</sup> For HtmA7, the strain was *E. coli* BL21(DE3) with plasmid pGro7.<sup>[9]</sup> For *holo*-module 1, the host strain was *E. coli* BAP1 with pGro7. The overnight seed culture with kanamycin (25  $\mu$ g/mL) and chloramphenicol (25  $\mu$ g/mL) for pGro7 grown in 2 $\times$ TY medium were inoculated into LB medium (1 L) and continue to grow at 37  $^{\circ}$ C to A600 values of 0.3-0.5. For HtmA7 and *holo*-module 1 expression, additionally supplemented with 3.3 mM arabinose to induce GroEL/ES chaperone in pGro7.<sup>[9]</sup> After this, 0.2 mM of isopropyl- $\beta$ -dthiogalactopyranoside (IPTG) was added and further incubate at 16  $^{\circ}$ C for 18 h. Then, the culture were harvested by centrifugation (4500 $\times$ g) for 15 min and suspended in lysis buffer (20 mM Tris-HCl, pH 7.5, containing 300 mM NaCl and 10% glycerol) and then lysed by sonication. The lysates cleared by centrifugation (17000 $\times$ g) for 60 min were added to the His-Bind resin column (Sigma-Aldrich). The resin absorbed with proteins were first washed with three column volumes of lysis buffer, then eluted with a step gradient lysis buffer contained increasing imidazole concentrations of 15, 50, 100, 200 and 400 mM. Fractions containing targeted proteins were further purified on a Superdex 200 16/600 column with lysis buffer at a flow rate of 1 mL/min. The fractions containing purified protein were pooled and concentrated based on SDS-PAGE (Figure S61). The theoretical molecular weights of target proteins are 160050 Da (*holo*-module 1), 136335 Da (*holo*-module 2), 90462 Da (*holo*-module 3), 90430 Da (*holo*-module 3( $KS_3$ (C155A))), 72873 Da (HtmA7), respectively.

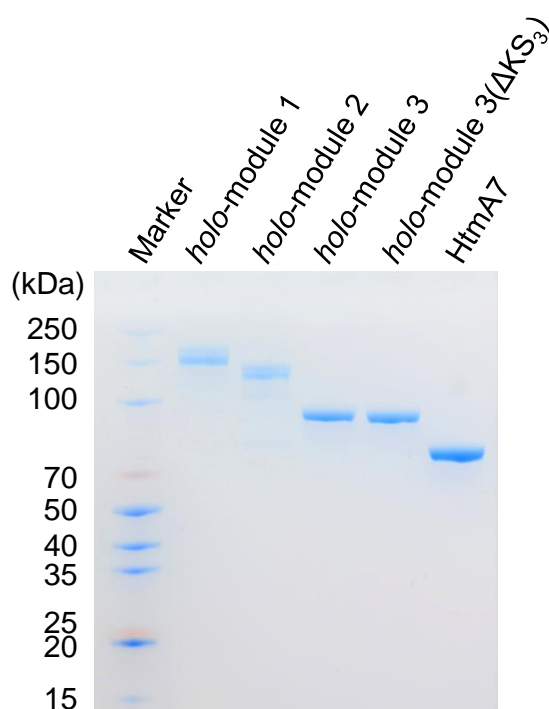

**Figure S61.** SDS-PAGE analysis of all recombinant enzymes used in this study. The theoretical molecular weights of target proteins are 160050 Da (*holo*-module 1), 136335 Da (*holo*-module 2), 90462 Da (*holo*-module 3), 90430 Da (*holo*-module 3( $\Delta$  $KS_3$ )), 72873 Da (HtmA7), respectively.

## SUPPORTING INFORMATION

**Module assay.** For the polyketide chain elongation assay, reaction was performed in a total volume of 100  $\mu\text{l}$  containing 10  $\mu\text{M}$  *holo*-module 1/*holo*-module 2/*holo*-module 3/*holo*-module 3( $\Delta\text{KS}_3$ ), 200  $\mu\text{M}$  (*E*)-2-butenoyl-SNAC, 5  $\mu\text{M}$  HtmA7, 200  $\mu\text{M}$  malonyl-CoA, 5 mM ATP, 100  $\mu\text{M}$  NADPH and 10 mM  $\text{MgCl}_2$  in 50 mM Tris-HCl buffer (pH 7.5) at 25  $^\circ\text{C}$  for 3 h. After reaction, the solution was hydrolyzed to release polyketide chains as described below, then the products were submitted to LC-ESI-HRMS analysis.

**Hydrolysis of thioester-bound products and LC-ESI-HRMS analysis.** After enzymatic assay, the reaction was quenched by the addition of 20% trichloroacetic acid (TCA). The precipitated protein was pelleted by centrifugation and was washed twice with 10% TCA. The protein pellet was then dissolved in 100  $\mu\text{l}$  KOH (0.1 M) for 2 h at room temperature. 5  $\mu\text{l}$  trifluoroacetic acid (TFA, 50%) was then added, and the solution was centrifuged to remove precipitated proteins. The solution was finally applied to LCESI-HRMS for analysis. LC-ESI-HRMS analysis was carried out on a Thermo Electron LTQ-Orbitrap XL using negative mode electrospray ionization, coupled to Thermo Accela 600 fitted with a Phenomenex Luna C18 column (250 $\times$ 4.6 mm, 5  $\mu\text{m}$ ) at a flow rate of 0.8 mL/min. The gradient elution system for separation of protein is a mixture of solvent A ( $\text{H}_2\text{O}$ ) and solvent B (acetonitrile). The procedure of the elution system is as following: 0-10 min, 2-25% B; 10-20 min, 25-75% B; 20-25 min, 100% B; 25-30 min, 2% B. The mass spectrometer was set to full scan (from  $m/z$  60 to 500).

**Synthesis of (*E*)-2-butenoyl-SNAC (2).** Crotonic acid (430 mg) was dissolved in  $\text{CH}_2\text{Cl}_2$  (15 mL) on 0  $^\circ\text{C}$  for 15 minutes. Then, added DMAP (122 mg), EDC·HCl (230 mg) and SNAC (500 mg) to this solution. The mixture was stirred overnight at room temperature. Saturated aqueous  $\text{NH}_4\text{Cl}$  was added to quench this reaction. After this, the mixture was extracted three times with  $\text{CH}_2\text{Cl}_2$ , and concentrated under reduced pressure. The final pure (*E*)-2-butenoyl-SNAC (2) was purified by HPLC with a yield of 51%. DMAP: 4-(*N,N*-dimethylamino) pyridine, SNAC: 2-(acetylamino)ethanethiol, EDC·HCl: *N*-ethyl-*N'*-(3-dimethylaminopropyl)carbodiimide hydrochloride.  $^1\text{H}$  NMR (400 MHz,  $\text{CD}_3\text{OD}$ ):  $\delta_{\text{H}}$  6.91 (dq,  $J = 15.3$  Hz, 6.9 Hz, 1H), 6.17 (dd,  $J = 15.4$  Hz, 1.4 Hz, 1H), 3.31 (t,  $J = 6.7$  Hz, 2H), 3.08 (t,  $J = 6.7$  Hz, 2H), 1.90 (s, 3H), 1.89 (dd,  $J = 6.9$  Hz, 1.4 Hz, 3H);  $^{13}\text{C}$  NMR (100 MHz,  $\text{CD}_3\text{OD}$ ):  $\delta_{\text{C}}$  190.8, 173.5, 142.9, 131.0, 40.3, 28.9, 22.7, 18.2 (Figures S62 and S63). ESI-HRMS ( $m/z$ ):  $[\text{M}+\text{H}]^+$  calculated for  $\text{C}_8\text{H}_{14}\text{NO}_2\text{S}^+$ , 188.0740; found, 188.0732 (Figure S64).

## SUPPORTING INFORMATION

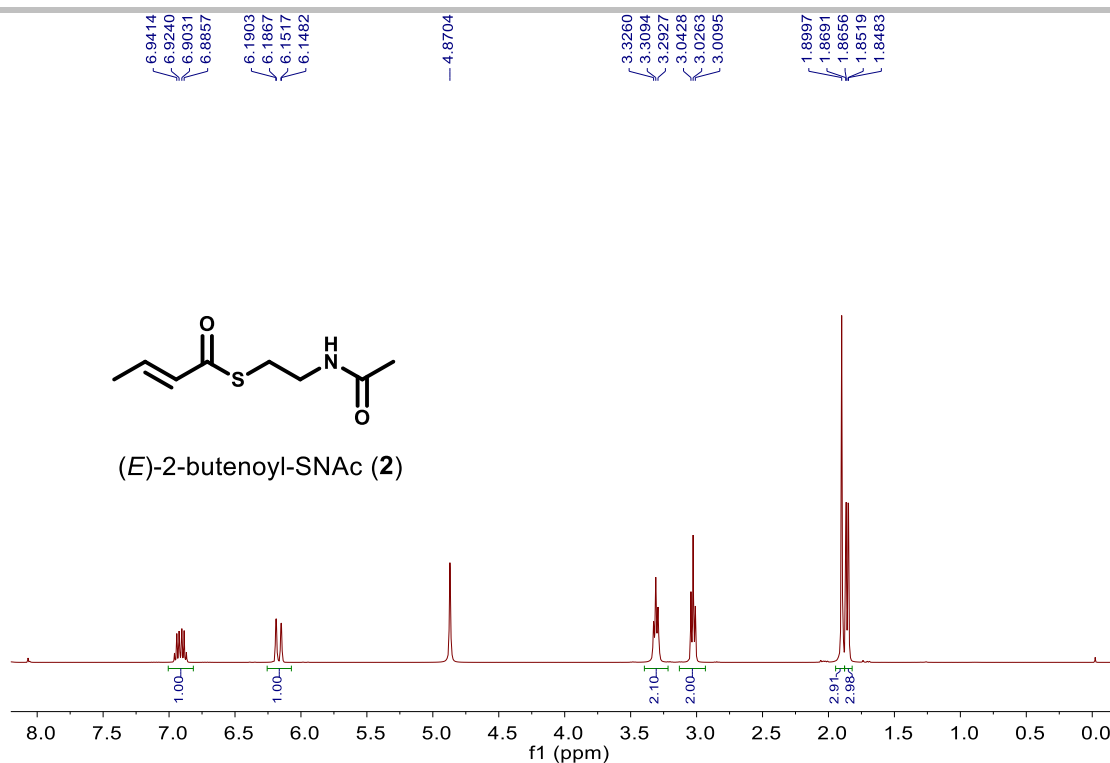

Figure S62. <sup>1</sup>H NMR spectrum of compound **2** (400 MHz, (CD<sub>3</sub>)<sub>2</sub>SO).

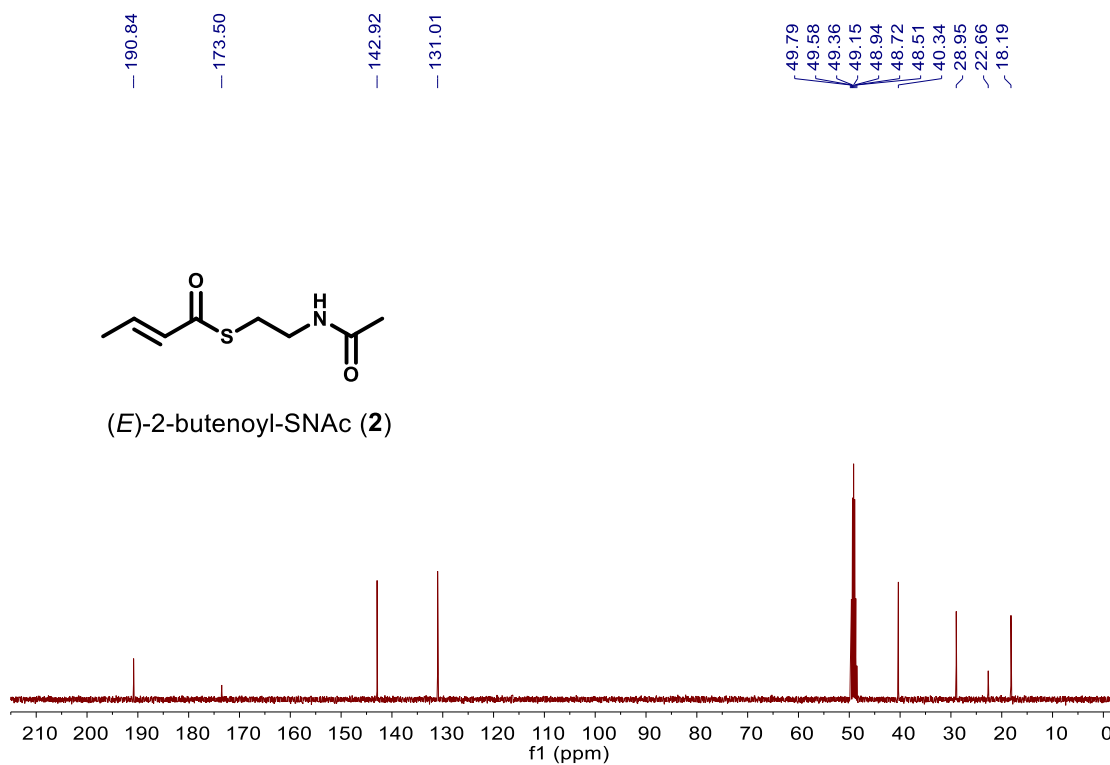

Figure S63. <sup>13</sup>C NMR spectrum of compound **2** (150 MHz, (CD<sub>3</sub>)<sub>2</sub>SO).

## SUPPORTING INFORMATION

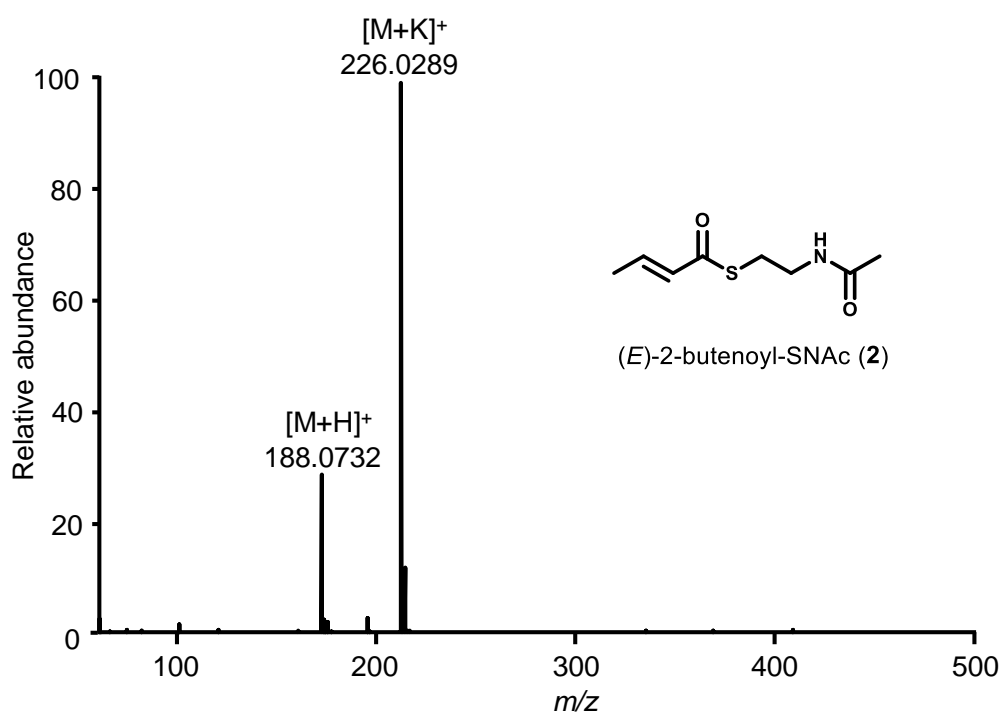

Figure S64. ESI-HRMS of compound **2**.

## SUPPORTING INFORMATION

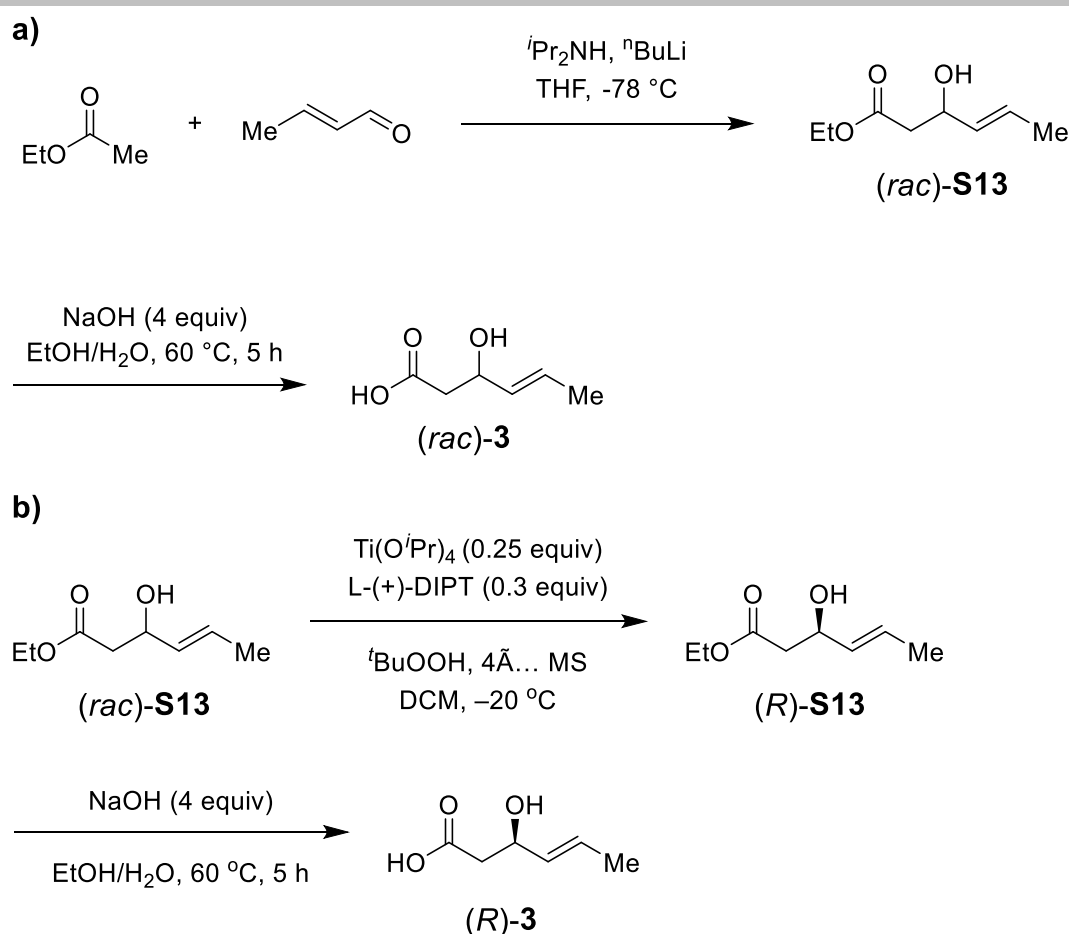

**Scheme S2.** Preparation of a) (*rac*)-**3** and b) enantiomerically enriched (*R*)-**3** by kinetic resolution through Sharpless epoxidation of ethyl (*rac*)-3-hydroxyhex-4-enoate (**S13**) and saponification. The *S* enantiomer is epoxidised faster than the *R* enantiomer, leading to its enrichment.

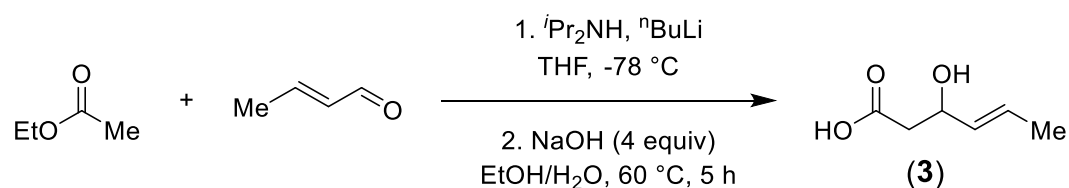

**Synthesis of (*E*)-3-hydroxyhex-4-enoic acid (**3**)** To a solution of  $t\text{Pr}_2\text{NH}$  (3.5 mL, 28 mmol) in THF (10 mL) was added  $n\text{BuLi}$  (10 mL, 2.5 M in hexane, 25 mmol) dropwise at  $-78\text{ }^\circ\text{C}$  under  $\text{N}_2$ . EtOAc (2 mL, 24 mmol) was then added dropwise. The resulting mixture was allowed to stir at  $-78\text{ }^\circ\text{C}$  for 40 min, and then a solution of crotonaldehyde (1.6 mL, 20 mmol) in THF (2 mL) was added dropwise. After 1 h at  $-78\text{ }^\circ\text{C}$ , the solution was poured into an ice-cold mixture of a saturated solution of  $\text{NH}_4\text{Cl}$  and EtOAc. The resulting mixture was stirred vigorously for a few minutes, and the layers were separated. The aqueous layer was extracted with EtOAc twice. The combined organic layers were dried over  $\text{MgSO}_4$ , filtered and concentrated to afford the ethyl (*E*)-3-hydroxyhex-4-enoate (*rac*)-**S13** as a colorless oil. To the residue was added NaOH (3.2 g, 80 mmol), EtOH (14 mL) and  $\text{H}_2\text{O}$  (4 mL). The resulting mixture was allowed to stir at  $60\text{ }^\circ\text{C}$  for 5 h. The solvent was removed under reduced pressure. The residue was dissolved in  $\text{H}_2\text{O}$ , and then the aqueous solution was washed with  $\text{Et}_2\text{O}$ . The aqueous solution was acidified to pH 1 with an aqueous solution of HCl (2 M) and extracted with EtOAc. The combined extracts were washed with brine, dried over  $\text{Na}_2\text{SO}_4$ , filtered and concentrated. Purification by column chromatography (5% MeOH in DCM) gave (*E*)-3-hydroxyhex-4-enoic acid (**3**)<sup>[10]</sup> as a yellow solid (1.53 g, 67 % yield over 2 steps).  $^1\text{H NMR}$  (400 MHz,  $\text{CD}_3\text{OD}$ ):  $\delta$  5.71 (dq,  $J = 15.2, 6.4$  Hz, 1H), 5.51 (dd,  $J = 15.2, 6.4$  Hz, 1H), 4.42 (q,  $J = 6.8$  Hz, 1H), 2.45 (dd,  $J = 15.1, 6.8$  Hz, 1H),

## SUPPORTING INFORMATION

2.43 (dd,  $J = 15.1, 6.8$  Hz, 1H), 1.66 (d,  $J = 6.8$  Hz, 3H).  $^{13}\text{C}$  NMR (100 MHz,  $\text{CD}_3\text{OD}$ ):  $\delta$  175.0, 134.0, 127.6, 70.2, 43.3, 17.8 (Figures S65 and S66). ESI-HRMS ( $m/z$ ):  $[\text{M}+\text{H}]^+$  calculated for  $\text{C}_6\text{H}_9\text{O}_3^+$ , 129.0546; found, 129.0558 (Figure S67).

**Synthesis of (3*R*,4*E*)-3-hydroxyhex-4-enoic acid (*R*)-**S13**.**<sup>[10]</sup> To a mixture of 4 Å molecular sieves (0.15 g) and  $\text{Ti}(\text{O}^i\text{Pr})_4$  (0.25 g, 1 mmol) in  $\text{CH}_2\text{Cl}_2$  (8 mL) was added L-(+)-DIPT (0.25 mL, 1.2 mmol) dropwise at  $-20$  °C. The mixture was stirred at  $-20$  °C for 30 min, and a solution of (*rac*)-ethyl (4*E*)-3-hydroxy-4-hexenoate (**S13**, 0.63 g, 4 mmol) in  $\text{CH}_2\text{Cl}_2$  (2 mL) was injected. The mixture was stirred for additional 30 min at  $-20$  °C, and then cooled to  $-40$  °C. A solution of  $t\text{BuOOH}$  in decane (0.8 mL, 5 M, 4 mmol) was added dropwise. The reaction was carried out at  $-20$  °C for 30 h, and quenched by addition of  $\text{Me}_2\text{S}$  (0.29 mL, 4 mmol). After 30 min at  $-20$  °C, 10% tartaric acid (2 mL), KF (0.29 g, 5 mmol), and Celite (0.25 g) were added. The resulting mixture was stirred at room temperature for 30 min and filtered through a pad of Celite with EtOAc. The residue was purified by column chromatography (10% EtOAc in hexanes) to produce ethyl (3*R*,4*E*)-3-hydroxy-4-hexenoate (*R*)-**S13** as a colorless oil (276.5 mg, 43% yield):  $[\alpha]_D^{20} = +4.9$  ( $c = 0.208$ ,  $\text{CHCl}_3$ ). The enantiomeric excess of ethyl (3*R*,4*E*)-3-hydroxy-4-hexenoate was determined by HPLC analysis on chiral column (Daicel, Chiralcel AD-H). Conditions: hexane/isopropanol = 98/2, flow rate = 0.5 mL/min, UV-Vis detection at  $\lambda_{\text{max}} = 214$  nm,  $t_R = 31.6$  min (major), 33.4 min (minor).

**Synthesis of (3*R*,4*E*)-3-hydroxyhex-4-enoic acid.** A 5 mL flask was charged with ethyl (3*R*,4*E*)-3-hydroxy-4-hexenoate ((*R*)-**S13**, 114.3 mg, 0.63 mmol), NaOH (106.4 mg, 4 mmol), EtOH (0.7 mL) and  $\text{H}_2\text{O}$  (0.2 mL). The resulting mixture was allowed to stir at 60 °C for 5 h. The solvent was removed under reduced pressure. The residue was dissolved in  $\text{H}_2\text{O}$ , and then the aqueous solution was washed with  $\text{Et}_2\text{O}$ . The aqueous solution was acidified to pH = 1 with an aqueous solution of HCl (2 M) and extracted with EtOAc. The combined extracts were washed with brine, dried over  $\text{Na}_2\text{SO}_4$ , filtered and concentrated. Purification by column chromatography (5% MeOH in DCM) gave (3*R*,4*E*)-3-hydroxyhex-4-enoic acid (*R*)-**3** as a yellow oil (46.8 mg, 57 % yield).  $^1\text{H}$  NMR (400 MHz,  $\text{CD}_3\text{OD}$ ):  $\delta$  5.71 (dq,  $J = 15.2, 6.4$  Hz, 1H), 5.51 (dd,  $J = 15.2, 6.4$  Hz, 1H), 4.42 (q,  $J = 6.8$  Hz, 1H), 2.45 (d,  $J = 4.0$  Hz, 1H), 2.43 (d,  $J = 3.6$  Hz, 1H), 1.66 (d,  $J = 6.8$  Hz, 3H).  $^{13}\text{C}$  NMR (100 MHz,  $\text{CD}_3\text{OD}$ ):  $\delta$  175.0, 134.0, 127.5, 70.1, 43.3, 17.8. The enantiomeric excess of (3*R*,4*E*)-3-hydroxyhex-4-enoic acid was determined by HPLC analysis on chiral column (Daicel, Chiralcel AD-H). Conditions: hexane/isopropanol = 95/5, flow rate = 1.0 mL/min, UV-Vis detection at  $\lambda_{\text{max}} = 210$  nm,  $t_R = 12.178$  min (major), 13.417 min (minor) (Figure S68).

## SUPPORTING INFORMATION

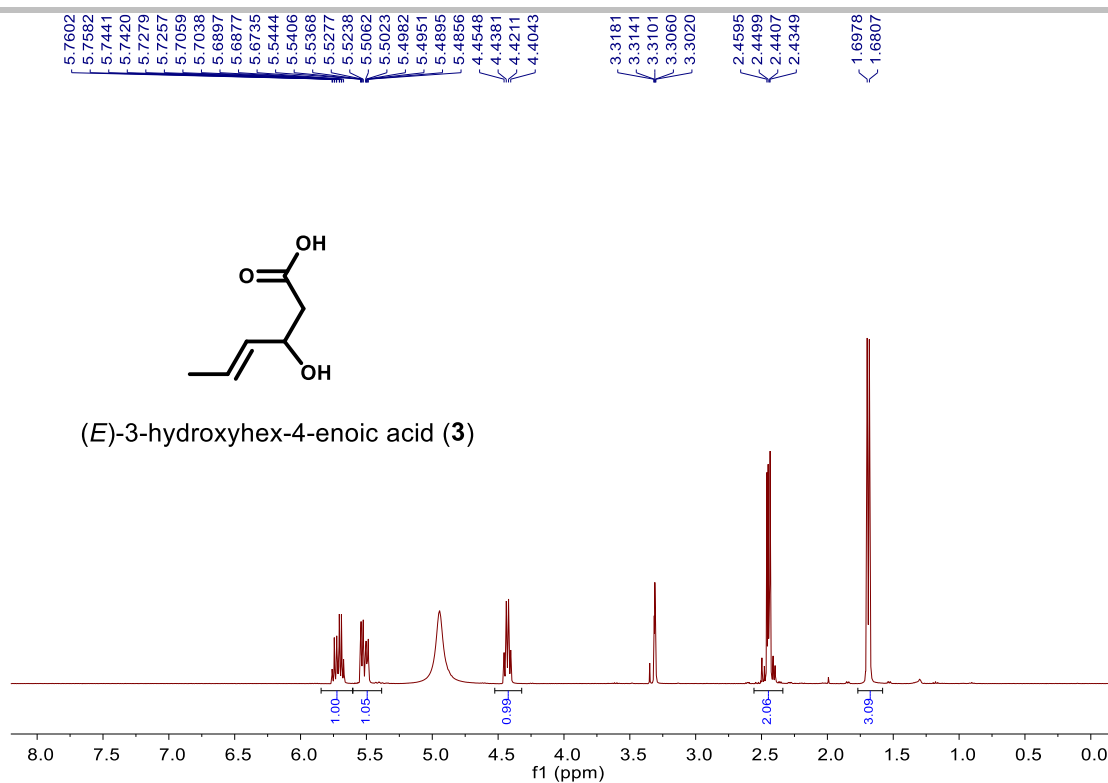

Figure S65. <sup>1</sup>H NMR spectrum of compound **3** (400 MHz, CD<sub>3</sub>OD).

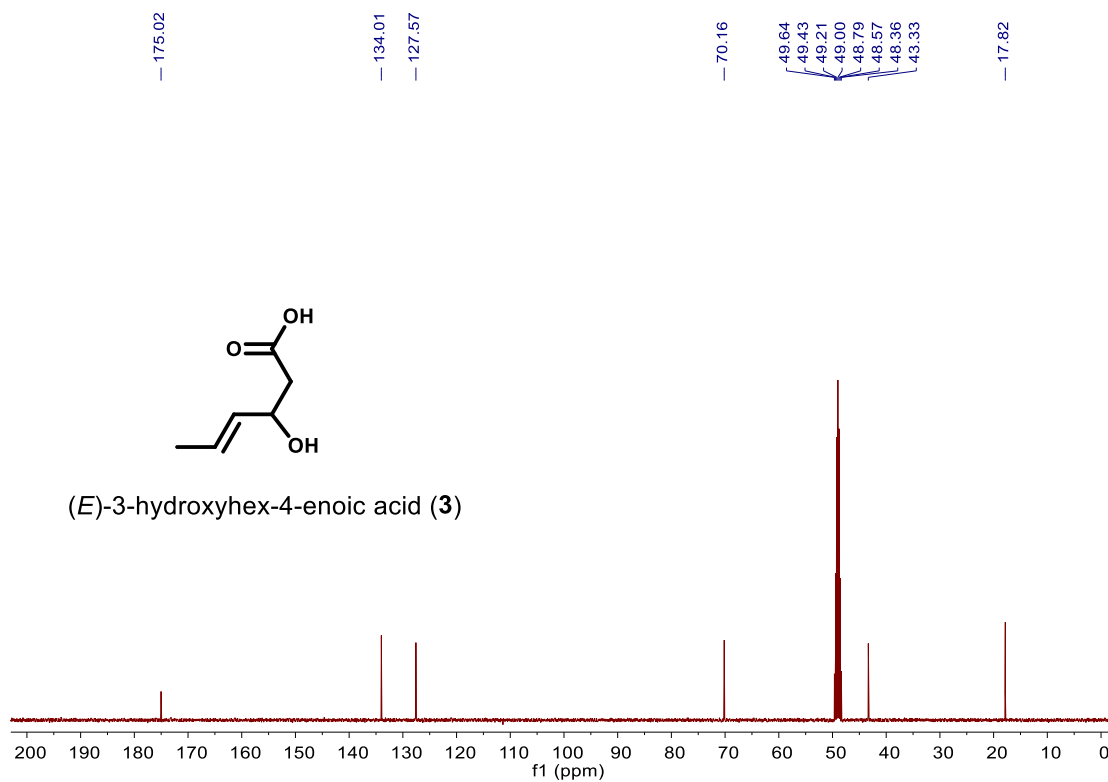

Figure S66. <sup>13</sup>C NMR spectrum of compound **3** (100 MHz, CD<sub>3</sub>OD).



## SUPPORTING INFORMATION

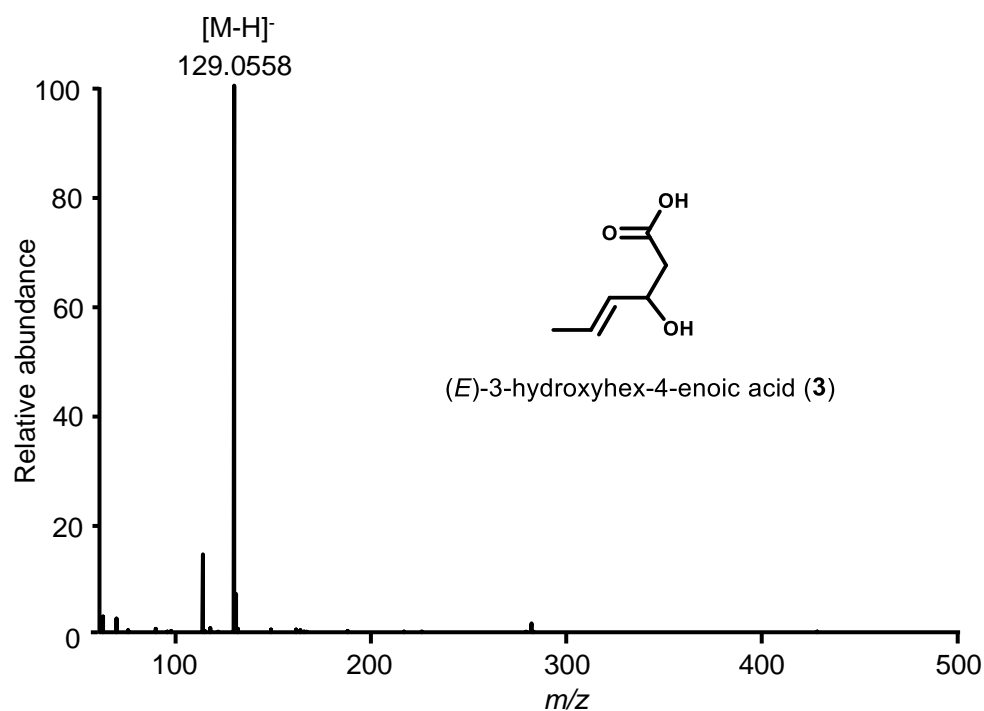

Figure S67. ESI-HRMS of compound **3**.

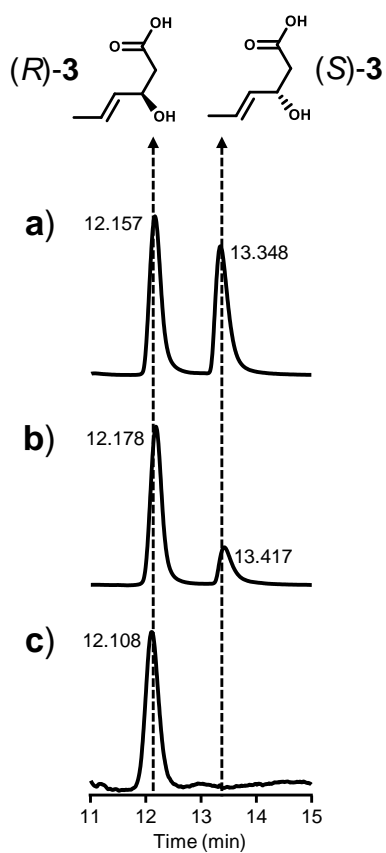

Figure S68. Confirmation of configuration of C3-hydroxy group in the product **3** from in vitro assay of *holo*-module 2 with synthetic **2** by chiral HPLC analysis. a) Synthetic racemic **3**. b) Synthetic enantiomerically enriched **3**. c) Product **3** from in vitro assay of *holo*-module 2 with synthetic **2**.

## SUPPORTING INFORMATION

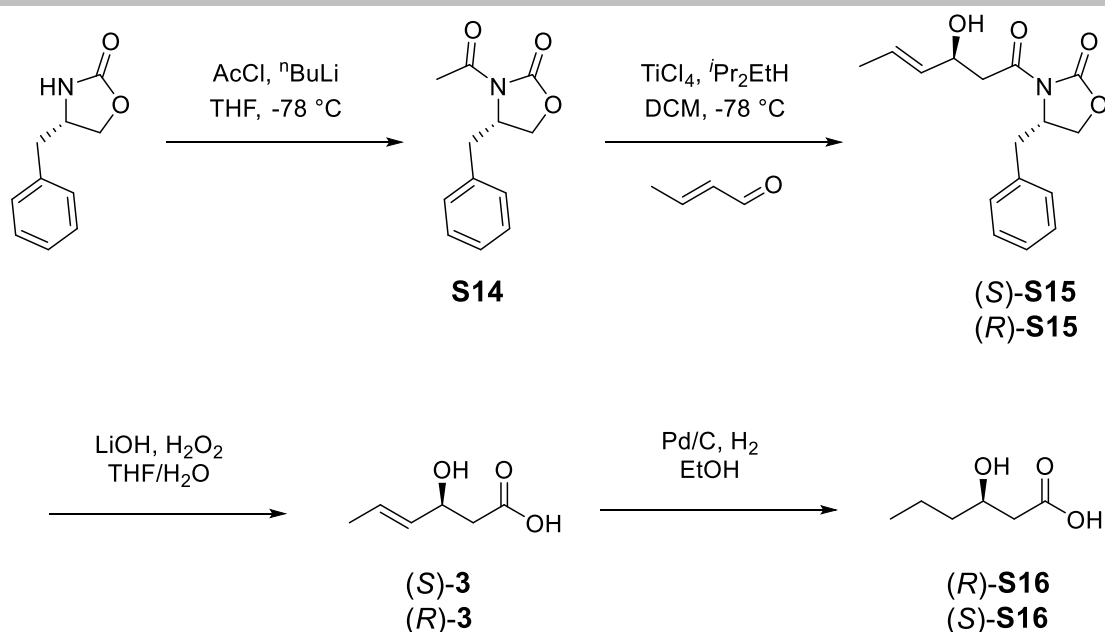

**Scheme S3.** Preparation of (S)-3 and (R)-3 by Evans' acyl oxazolidinone.

**Synthesis of (S)-3-acetyl-4-benzyl-2-oxazolidinone (S14).**<sup>[11]</sup> To a (S)-4-benzyl-2-oxazolidinone (3.30 g, 18.5 mmol) in THF (30 mL) was added  $^n\text{BuLi}$  (11.7 mL, 1.6 M in hexane, 18.7 mmol) dropwise at  $-78\text{ }^\circ\text{C}$  under Ar. After 20 min, AcCl (1.65 g, 21.1 mmol) was added dropwise. The reaction mixture was allowed to stir at  $-78\text{ }^\circ\text{C}$  for 2.5 h. The mixture was poured into a saturated aqueous solution of  $\text{NH}_4\text{Cl}$  (15 mL). After removal of THF under reduced pressure, the aqueous layer was extracted with  $\text{CH}_2\text{Cl}_2$  (2 x 30 mL). The combined organic layers were washed with 10% NaOH solution and dried with  $\text{MgSO}_4$ , filtered and concentrated to dryness. The residue was purified through silica gel column chromatography (cyclohexane/EtOAc, 5 : 1) to afford ethyl (S)-3-acetyl-4-benzyl-2-oxazolidinone (S14)<sup>[11]</sup> as a white solid (2.80 g, 12.8 mmol, 69 % yield).  $^1\text{H NMR}$  (500 MHz,  $\text{CDCl}_3$ ):  $\delta_{\text{H}}$  7.33 (m, 2H), 7.28 (m, 1H), 7.21 (m, 2H), 4.67 (ddt,  $J = 9.6, 7.6, 3.2$  Hz, 1H), 4.18 (m, 2H), 3.31 (dd,  $J = 13.4, 3.4$  Hz, 1H), 2.78 (dd,  $J = 13.4, 9.6$  Hz, 1H), 2.56 (s, 3H) ppm;  $^{13}\text{C NMR}$  (125 MHz,  $\text{CDCl}_3$ ):  $\delta_{\text{C}}$  190.8, 170.4, 153.8, 135.3, 129.6, 129.1, 127.5, 66.2, 55.1, 38.0, 24.0 ppm (Figures S69 and S70).

**Synthesis of (S)-4-benzyl-3-((S,E)-3-hydroxyhex-4-enoyl)oxazolidin-2-one ((S)-S15) and (S)-4-benzyl-3-((R,E)-3-hydroxyhex-4-enoyl)oxazolidin-2-one ((R)-S15).**<sup>[12]</sup> (S)-3-Acetyl-4-benzyl-2-oxazolidinone (2.00 g, 9.1 mmol) was dissolved in  $\text{CH}_2\text{Cl}_2$  (45 mL,  $-78\text{ }^\circ\text{C}$ ) under Ar. A solution of  $\text{TiCl}_4$  (3.46 g, 18.2 mmol) in  $\text{CH}_2\text{Cl}_2$  (18 mL) was added dropwise, followed by the addition of diisopropylethylamine (2.35 g, 18.2 mmol). The resulting mixture was allowed to stir at  $-78\text{ }^\circ\text{C}$  for 1 h, and then a solution of crotonaldehyde (1.28 g, 18.2 mmol) was added dropwise. Stirring was continued at  $-78\text{ }^\circ\text{C}$  for 5 h and then allowed to warm to room temperature with continued stirring overnight. The mixture was poured onto a saturated aqueous solution of  $\text{NH}_4\text{Cl}$  (30 mL). The aqueous layer was extracted with  $\text{CH}_2\text{Cl}_2$  (2 x 100 mL). The combined organic layers were washed with brine, dried with  $\text{MgSO}_4$ , filtered and concentrated to dryness. Purification of the crude product by column chromatography on silica gel (cyclohexane/EtOAc, 3 : 1) gave (S)-4-benzyl-3-((S,E)-3-hydroxyhex-4-enoyl)oxazolidin-2-one ((S)-S15) (685 mg, 2.4 mmol, 26 % yield) and (S)-4-benzyl-3-((R,E)-3-hydroxyhex-4-enoyl)oxazolidin-2-one ((R)-S15) (359 mg, 1.2 mmol, 14 % yield) as yellow solids.

(S)-4-Benzyl-3-((S,E)-3-hydroxyhex-4-enoyl)oxazolidin-2-one ((S)-S15).<sup>[13]</sup>  $^1\text{H NMR}$  (500 MHz,  $\text{C}_6\text{D}_6$ ):  $\delta_{\text{H}}$  7.04 (m, 3H), 6.85 (m, 2H), 5.72 (dq,  $J = 15.4, 6.5, 1.3$  Hz, 1H), 5.55 (ddq,  $J = 15.3, 5.9, 1.6$  Hz, 1H), 4.68 (dq,  $J = 9.2, 4.2$  Hz, 1H), 4.07 (ddt,  $J = 9.3, 8.0, 3.1$  Hz, 1H), 3.42 (dd,  $J = 9.0, 2.8$  Hz, 1H), 3.35 (dd,  $J = 16.8, 3.5$  Hz, 1H), 3.14 (dd,  $J = 8.9, 8.0$  Hz, 1H), 3.07 (dd,  $J = 16.8, 3.5$  Hz, 1H), 2.87 (m, 2H), 2.24 (dd,  $J = 13.4, 9.3$  Hz, 1H), 1.53 (dt,  $J = 6.5, 1.4$  Hz, 3H) ppm;  $^{13}\text{C NMR}$  (125 MHz,  $\text{C}_6\text{D}_6$ ):  $\delta_{\text{C}}$  172.1, 153.3, 135.8, 133.2, 129.7, 129.0, 127.4, 126.3, 69.0, 65.7, 54.9, 43.3, 37.6, 17.7 ppm (Figures S71 and S72).

(S)-4-Benzyl-3-((R,E)-3-hydroxyhex-4-enoyl)oxazolidin-2-one ((R)-S15).  $^1\text{H NMR}$  (500 MHz,  $\text{C}_6\text{D}_6$ ):  $\delta_{\text{H}}$  7.04 (m, 3H), 6.85 (m, 2H), 5.71 (dq,  $J = 15.4, 6.5, 1.3$  Hz, 1H), 5.54 (ddq,  $J = 15.3, 6.0, 1.6$  Hz, 1H), 4.70z (m, 1H), 4.05 (ddt,  $J = 9.5, 8.0, 3.1$  Hz, 1H), 3.41 (dd,  $J =$

## SUPPORTING INFORMATION

8.9, 2.8 Hz, 1H), 3.23 (d,  $J = 3.26$  Hz, 1H), 3.22 (d,  $J = 0.9$  Hz, 1H), 3.10 (ddd,  $J = 8.9, 8.0, 0.7$  Hz, 1H), 2.93 (dd,  $J = 13.4, 3.3$  Hz, 1H), 2.74 (d,  $J = 4.5$  Hz, 1H), 2.26 (dd,  $J = 13.4, 9.5$  Hz, 1H), 1.53 (dt,  $J = 6.5, 1.4$  Hz, 3H) ppm;  $^{13}\text{C}$  NMR (125 MHz,  $\text{C}_6\text{D}_6$ ):  $\delta_{\text{C}}$  172.1, 153.3, 135.8, 133.1, 129.6, 129.0, 127.4, 126.4, 68.9, 65.7, 54.9, 43.4, 37.8, 17.7 ppm (Figures S73 and S74). HRMS (APCI):  $[\text{M}+\text{H}]^+$  calculated for  $\text{C}_{16}\text{H}_{20}\text{NO}_4^+$   $m/z$  290.1387; found  $m/z$  290.1385.

**Synthesis of (S,E)-3-hydroxyhex-4-enoic acid ((S)-3).** According to a known procedure,<sup>[14]</sup> (S)-4-benzyl-3-((S,E)-3-hydroxyhex-4-enoyl)oxazolidin-2-one ((S)-S15) (145 mg, 0.5 mmol) was dissolved in THF (2.1 mL) and  $\text{H}_2\text{O}$  (0.5 mL). The solution was cooled to 0 °C and a solution of  $\text{H}_2\text{O}_2$  (35%, 0.21 mL, 18.2 mmol) was added dropwise. LiOH (36 mg, 1.5 mmol) was added and the resulting mixture was allowed to stir for 2 h, and then quenched by the addition of an aqueous solution of  $\text{Na}_2\text{SO}_3$  (270 mg in 1.6 mL  $\text{H}_2\text{O}$ ). After removal of THF under reduced pressure the aqueous phase was extracted with  $\text{CH}_2\text{Cl}_2$  (10 mL), then acidified by the addition of 2 N HCl solution to pH 1, and extracted with  $\text{Et}_2\text{O}$  (3 x 10 mL). The combined organic layers were dried with  $\text{MgSO}_4$ , filtered and concentrated to yield (S,E)-3-hydroxyhex-4-enoic acid ((S)-3)<sup>[15]</sup> as a colorless oil (40 mg, 0.3 mmol, 61 % yield). Optical rotation:  $[\alpha]_{\text{D}}^{25} = -7.5$  (c 0.3, EtOH), lit.  $[\alpha]_{\text{D}}^{25} = -22.2$  (c 0.4, EtOH);<sup>[15]</sup>  $^1\text{H}$  NMR (500 MHz,  $\text{C}_6\text{D}_6$ ):  $\delta_{\text{H}}$  5.45 (dq,  $J = 15.3, 6.5, 1.3$  Hz, 1H), 5.26 (ddq,  $J = 15.3, 6.3, 1.6$  Hz, 1H), 4.29 (dddq,  $J = 8.4, 6.3, 4.1, 1.1$  Hz, 1H), 2.32 (dd,  $J = 16.0, 8.4$  Hz, 1H), 2.22 (dd,  $J = 16.0, 4.1$  Hz, 1H), 1.43 (ddd,  $J = 6.5, 1.7, 1.0$  Hz, 3H) ppm;  $^{13}\text{C}$  NMR (125 MHz,  $\text{C}_6\text{D}_6$ ):  $\delta_{\text{C}}$  176.9, 132.5, 126.8, 68.8, 41.7, 17.6 ppm (Figures S75 and S76).

**Synthesis of (R,E)-3-hydroxyhex-4-enoic acid ((R)-3).** Following the same procedure,<sup>[14]</sup> (S)-4-benzyl-3-((R,E)-3-hydroxyhex-4-enoyl)oxazolidin-2-one ((R)-S15) (145 mg, 0.5 mmol) was converted to yield (R,E)-3-hydroxyhex-4-enoic acid ((R)-3)<sup>[15]</sup> as a colorless oil (50 mg, 0.4 mmol, 77 % yield). Optical rotation:  $[\alpha]_{\text{D}}^{25} = +12.5$  (c 0.4, EtOH), lit.  $[\alpha]_{\text{D}}^{25} = +22.5$  (c 0.4, EtOH)<sup>[15]</sup>

**Synthesis of (R)-3-hydroxyhexanoic acid ((R)-S16).** (S,E)-3-Hydroxyhex-4-enoic acid ((S)-3) (10 mg, 0.08 mmol) was dissolved in EtOH (5 mL). A catalytic amount of Pd/C (5%, 5 mg) was added and the atmosphere was exchanged to  $\text{H}_2$  (10 bar). The reaction mixture was stirred for 1 h, the catalyst was filtered off, and the filtrate was concentrated to yield (R)-3-hydroxyhexanoic acid ((R)-S16)<sup>[12]</sup> as a colorless oil (10 mg, 0.08 mmol, 100 % yield). Optical rotation:  $[\alpha]_{\text{D}}^{25} = -16.3$  (c 0.3,  $\text{CHCl}_3$ ), lit.  $[\alpha]_{\text{D}}^{22} = -20.0$  (c 1.0,  $\text{CHCl}_3$ );<sup>[12]</sup>  $^1\text{H}$  NMR (500 MHz,  $\text{CDCl}_3$ ):  $\delta_{\text{H}}$  4.05 (m, 1H), 2.58 (dd,  $J = 16.6, 3.0$  Hz, 1H), 2.48 (dd,  $J = 16.6, 8.9$  Hz, 1H), 1.46 (m, 2H), 0.95 (t,  $J = 7.0$  Hz, 3H) ppm;  $^{13}\text{C}$  NMR (125 MHz,  $\text{CDCl}_3$ ):  $\delta_{\text{C}}$  177.0, 67.9, 41.0, 38.8, 18.8, 14.1 ppm (Figures S77 and S78).

**Synthesis of (S)-3-hydroxyhexanoic acid ((S)-S16).** Following the same procedure, (R,E)-3-hydroxyhex-4-enoic acid ((R)-3) (4 mg, 0.03 mmol) was converted into (S,E)-3-hydroxyhex-4-enoic acid ((S)-S16)<sup>[16]</sup> that was obtained as a colorless oil (4 mg, 0.03 mmol, 100 % yield). Optical rotation:  $[\alpha]_{\text{D}}^{25} = +13.8$  (c 0.5,  $\text{CHCl}_3$ ), lit.  $[\alpha]_{\text{D}}^{20} = +13.0$  (c 0.5,  $\text{CHCl}_3$ ).<sup>[16]</sup>

## SUPPORTING INFORMATION

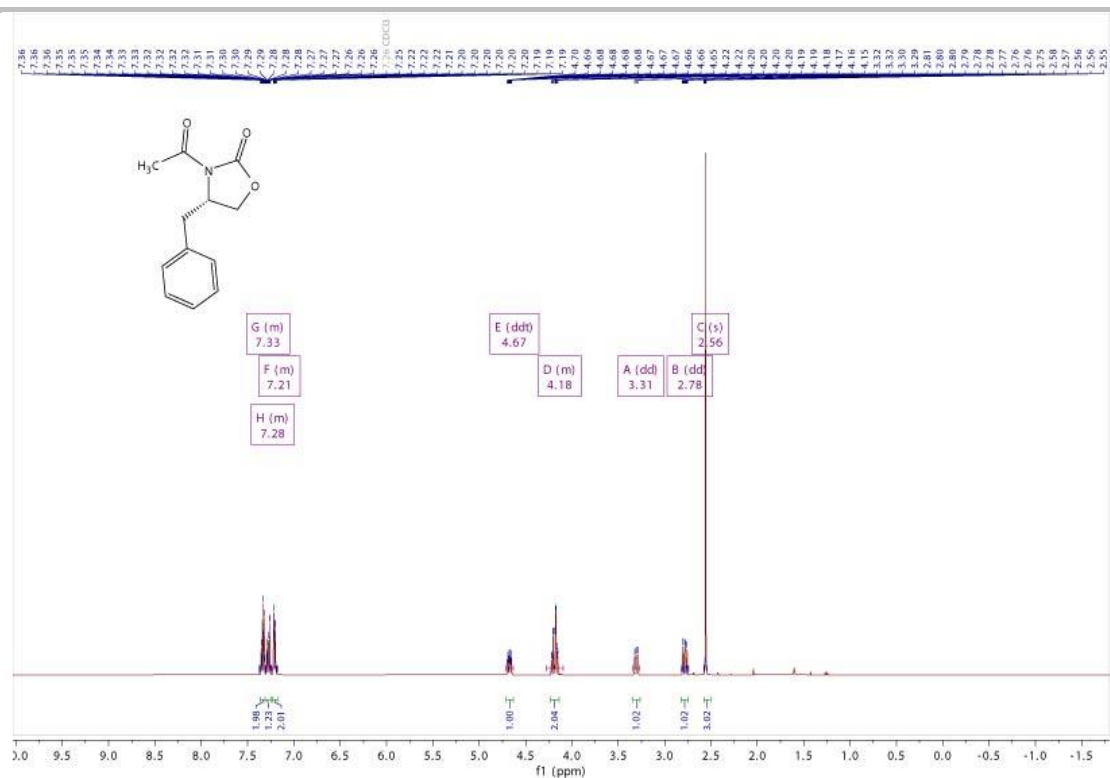

**Figure S69.**  $^1\text{H}$  NMR spectrum of compound **S14** (500 MHz,  $\text{CDCl}_3$ ).

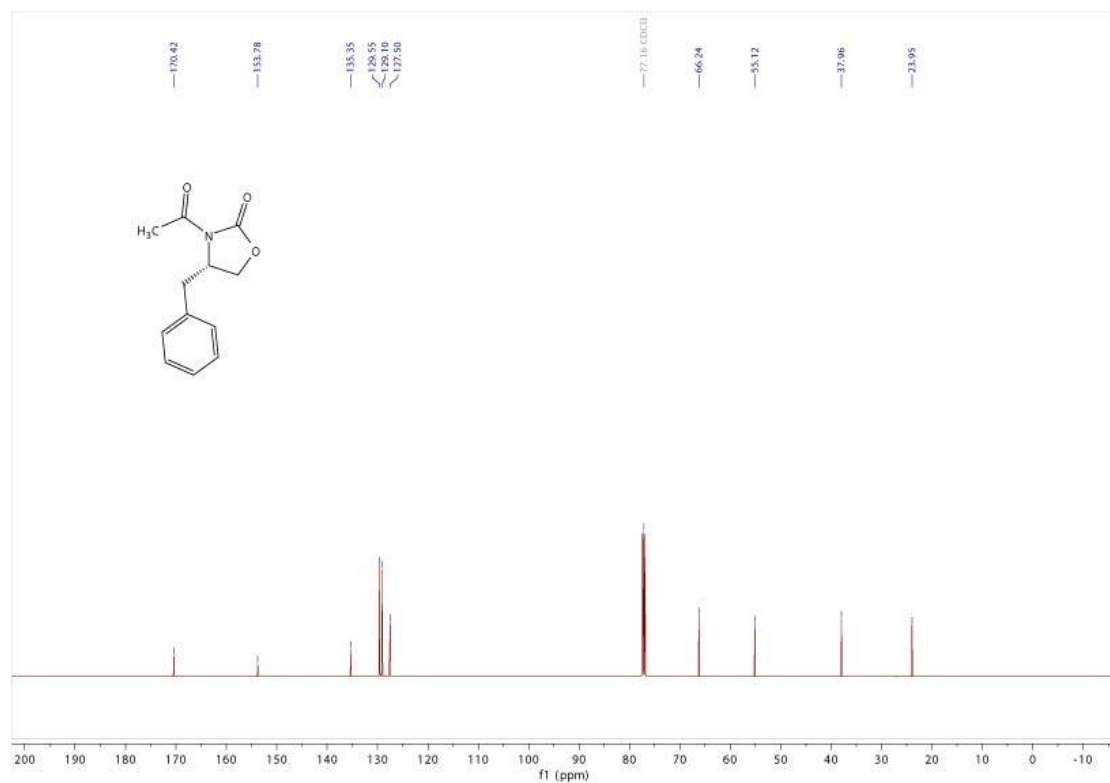

**Figure S70.**  $^{13}\text{C}$  NMR spectrum of compound **S14** (125 MHz,  $\text{CDCl}_3$ ).

## SUPPORTING INFORMATION

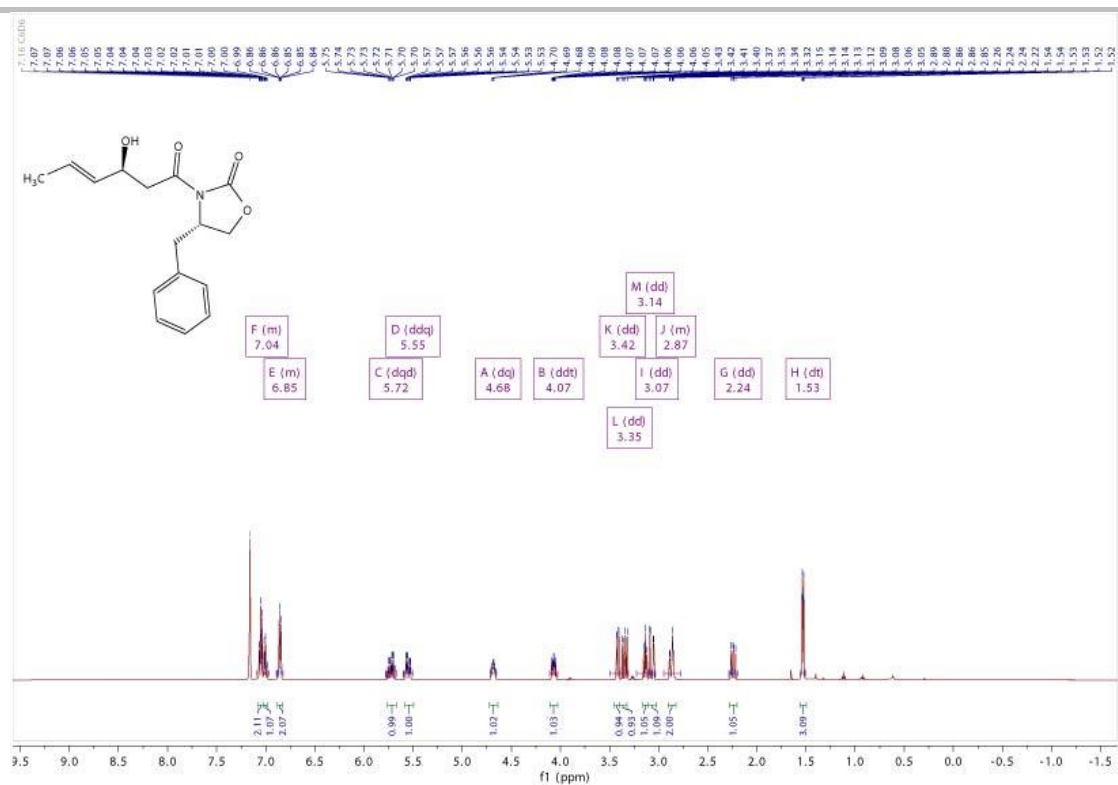

**Figure S71.**  $^1\text{H}$  NMR spectrum of compound (*S*)-**S15** (500 MHz,  $\text{C}_6\text{D}_6$ ).

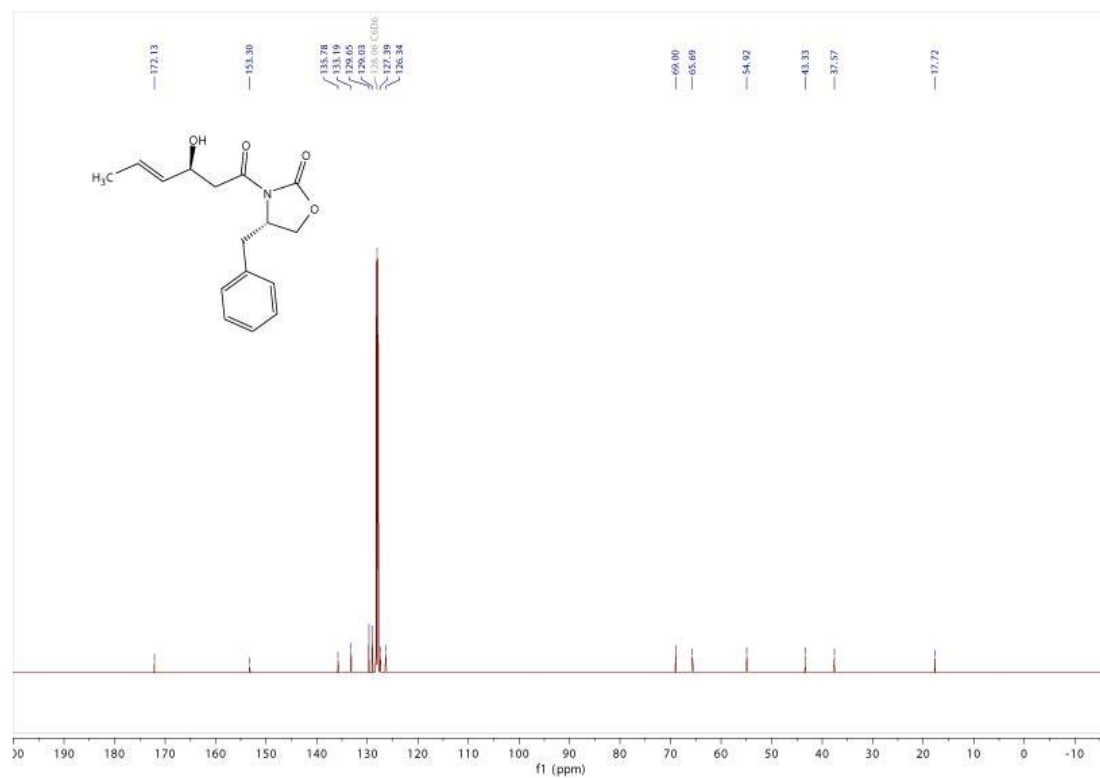

**Figure S72.**  $^{13}\text{C}$  NMR spectrum of compound (*S*)-**S15** (125 MHz,  $\text{C}_6\text{D}_6$ ).

## SUPPORTING INFORMATION

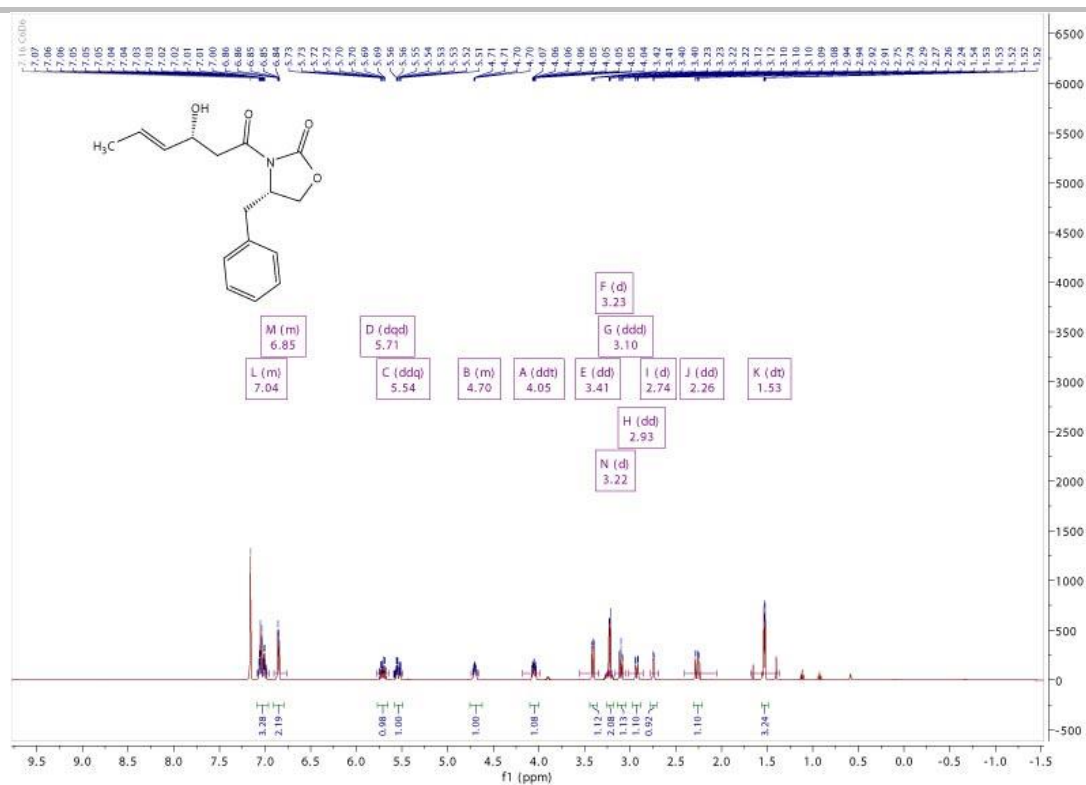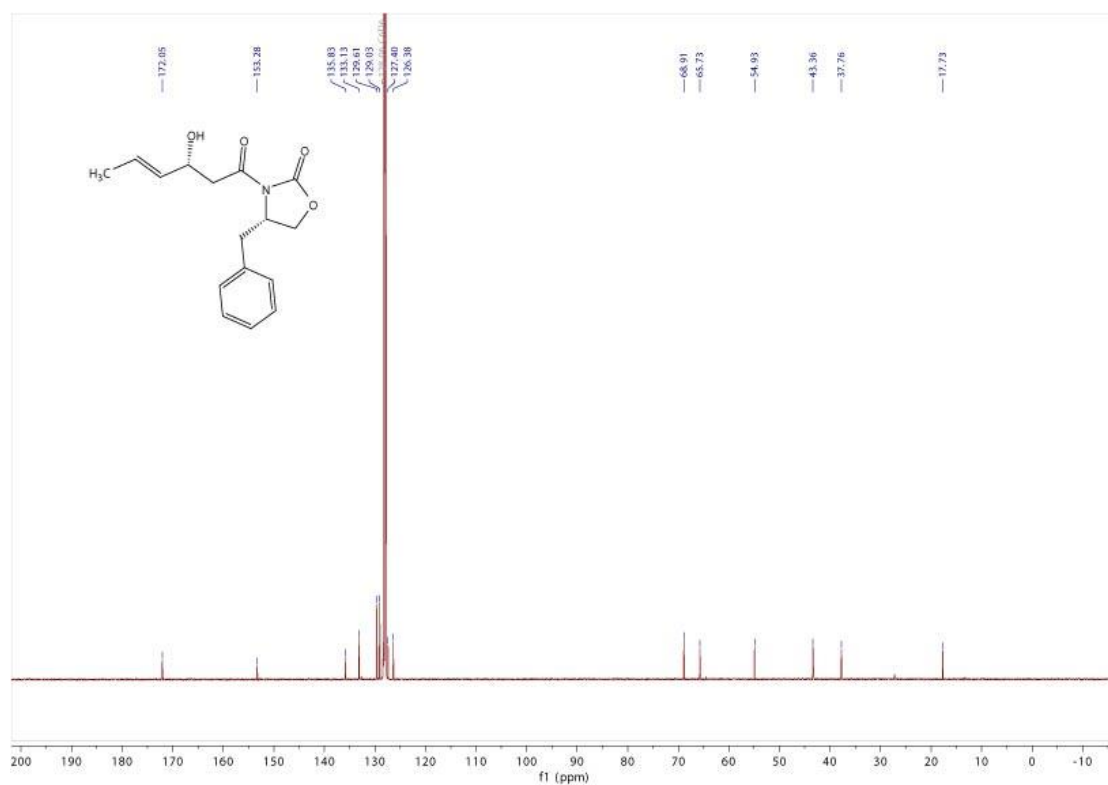

## SUPPORTING INFORMATION

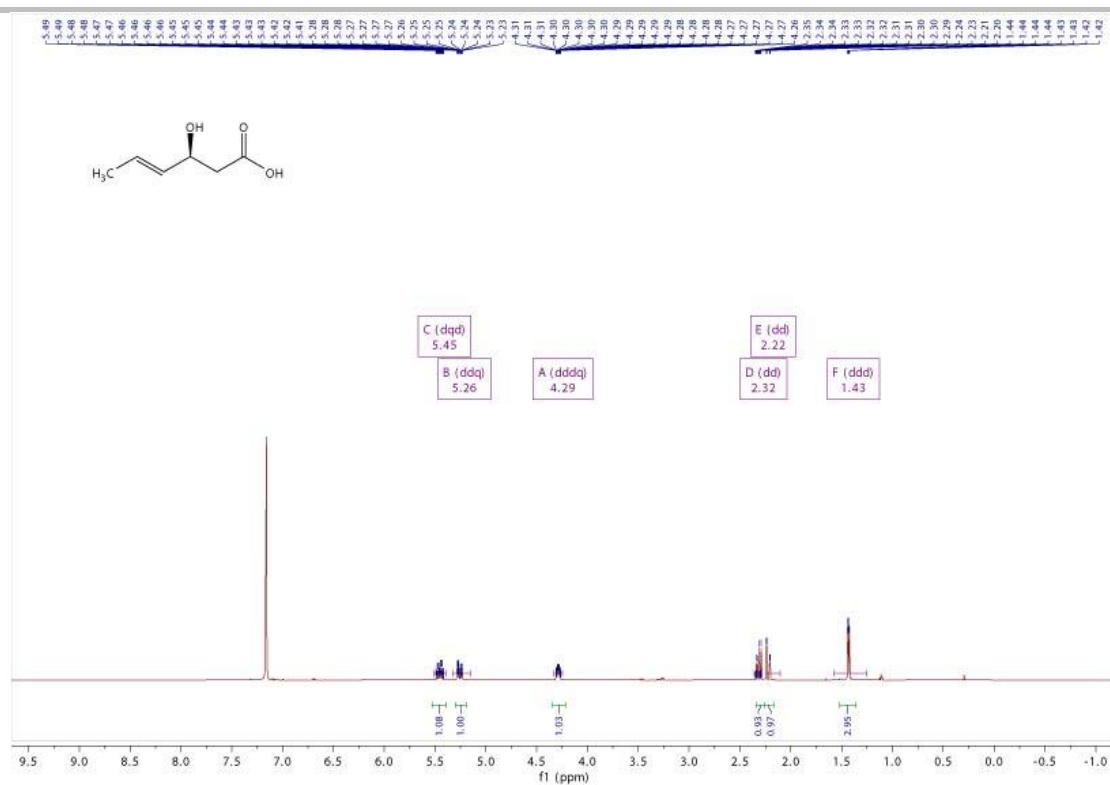

Figure S75. <sup>1</sup>H NMR spectrum of compound 3 (500 MHz, C<sub>6</sub>D<sub>6</sub>).

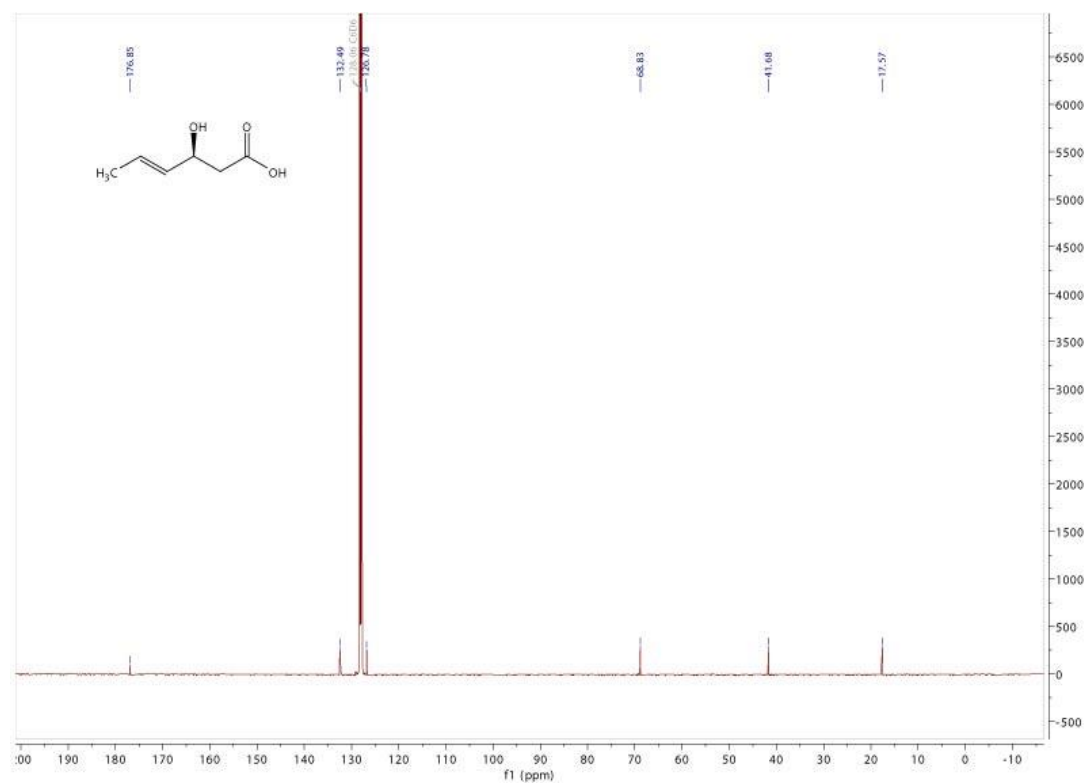

Figure S76. <sup>13</sup>C NMR spectrum of compound 3 (125 MHz, C<sub>6</sub>D<sub>6</sub>).

## SUPPORTING INFORMATION

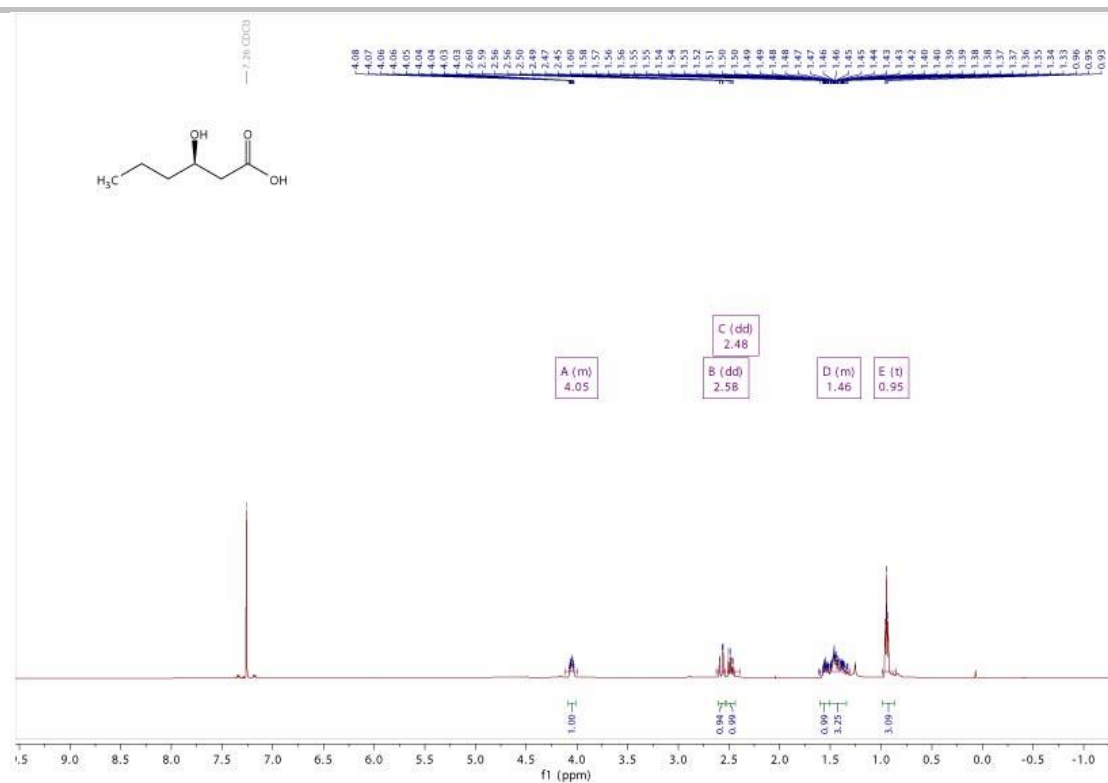

Figure S77.  $^1\text{H}$  NMR spectrum of compound **S16** (500 MHz,  $\text{CDCl}_3$ ).

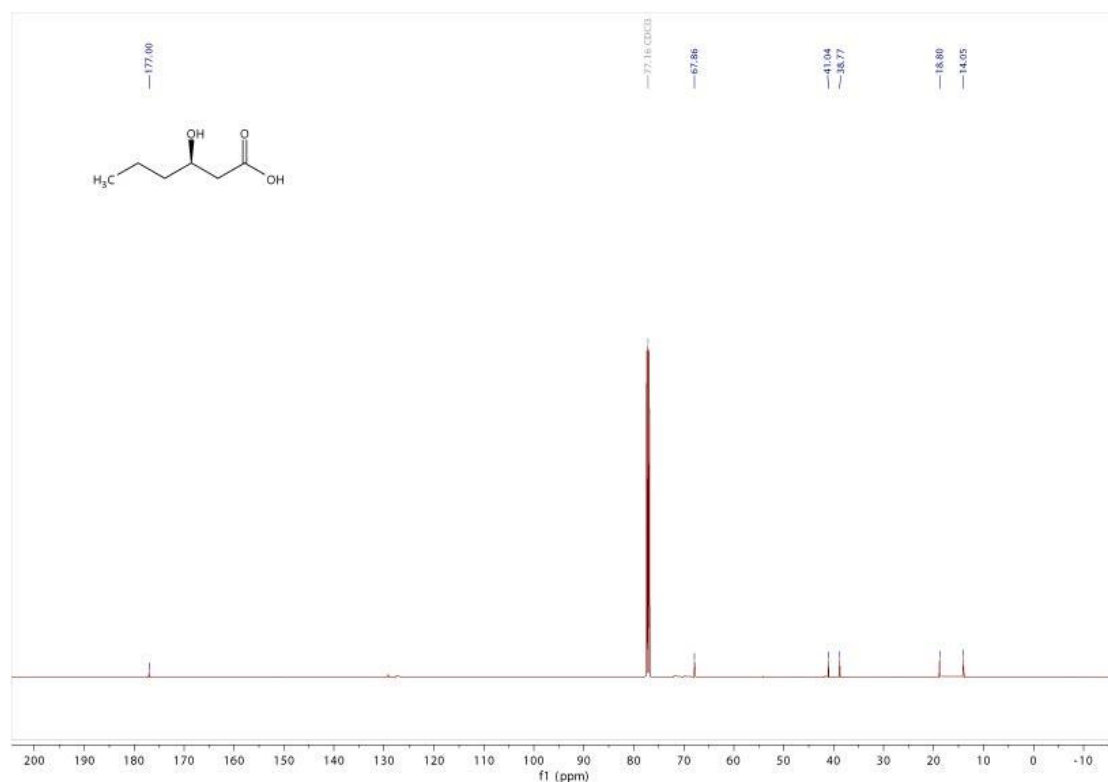

Figure S78.  $^{13}\text{C}$  NMR spectrum of compound **S16** (125 MHz,  $\text{CDCl}_3$ ).



## SUPPORTING INFORMATION

## References

- [1] M. S. B. Paget, L. Chamberlin, A. Atrih, S. J. Foster, M. J. Buttner, *J. Bacteriol.* **1999**, *181*, 204–211.
- [2] B. A. Pfeifer, S. J. Admiraal, H. Gramajo, D. E. Cane, C. Khosla, *Science* **2001**, *291*, 1790–1792.
- [3] Y. Liu, X. Chen, Z. Li, W. Xu, W. Tao, J. Wu, J. Yang, Z. Deng, Y. Sun, *ACS Chem. Biol.* **2017**, *12*, 2589–2597.
- [4] Y. Sun, X. He, J. Liang, X. Zhou, Z. Deng, *Appl. Microbiol. Biotechnol.* **2009**, *82*, 303–310.
- [5] H. Qu, X. Gao, H. Zhao, Z. Wang, J. Yi, *Carbohydr. Polym.* **2019**, *223*, 115056.
- [6] L. T. González, N. W. Minsky, L. E. Espinosa, R. S. Aranda, J. P. Meseguer, P. C. Pérez, *BMC Complement. Altern. Med.* **2017**, *17*, 39.
- [7] L. Zuo, B. Jiang, Z. Jiang, W. Zhao, S. Li, H. Liu, B. Hong, L. Yu, L. Zuo, L. Wu, *J. Antibiot. (Tokyo)* **2016**, *69*, 835–838.
- [8] M. Handa, K. A. Scheidt, M. Bossart, N. Zheng, W. R. Roush, *J. Org. Chem.* **2008**, *73*, 1031–1035.
- [9] K. Nishihara, M. Kanemori, M. Kitagawa, H. Yanagi, T. Yura, *Appl. Environ. Microbiol.* **1998**, *64*, 1694–1699.
- [10] Y. Wang, R. Takeyama, Y. Kobayashi, *Angew. Chem. Int. Ed.* **2006**, *45*, 3320–3323.
- [11] A. May, P. Willoughby, T. Hoye, *J. Org. Chem.* **2008**, *73*, 3292–3294.
- [12] S. Le, D. Muñoz, N. Saunders, T. Simpson, D. Smith, F. Soulas, C. Willis, *Org. Biomol. Chem.* **2005**, *3*, 1719–1728.
- [13] J. Son, M. Hwang, W. Lee, D. Lee, *Org. Lett.* **2007**, *9*, 3897–3900.
- [14] M. Martín, R. Rodríguez-Acebes, Y. Garcia-Ramos, V. Martínez, C. Murcia, I. Digón, I. Marco, M. Pelay-Gimeno, R. Fernández, F. Reyes, A. Francesch, S. Munt, J. Tulls- Puche, F. Albericio, C. Cuevas, *J. Am. Chem.Soc.* **2014**, *136*, 6754–6762.
- [15] T. Yan, A. Hung, H. Lee, C. Chang, W. Liu, *J. Org. Chem.* **1995**, *60*, 3301–3306.
- [16] S. Smith, M. Uteuliyev, J. Takacs, *Chem. Commun.* **2011**, *47*, 7812–7814.

## Author Contributions

M.L., Y. D. and L.T. performed the genetic and enzymatic assay. H.X., K.S., J. L. and Z.Y. synthesised the substrates. M.Q. and J.X. performed hepatoprotective experiment. G.S. and Z.D. analyzed the data and revised the manuscript. Y.S. and J.S.D. conceived the overall project, analyzed the data and wrote the manuscript.
